# Supplementary material for: Somatic sex-specific transcriptome differences in Drosophila revealed by whole transcriptome sequencing
Source: BMC Genomics. 2011 Jul 14;12:364. doi: 10.1186/1471-2164-12-364 (PMC3152543; doi:10.1186/1471-2164-12-364)
Supplement: Additional file 11 — Genes expressing more than 1 isoform. 1,722 genes expressing more than 1 isoform. Bold indicate genes downstream of tra. [file 1471-2164-12-364-S11.XLSX]

## Sheet: Sheet1
1,722 genes expressing more than 1 isoform. Bold indicate genes downstream of tra.
Gene	Name	Chr	Pos	Annotation	Isoforms	FvM.FDR	FvT.FDR	5primePos	3primePos	5primeCassette	3primeCassette	icassette	altexon
FBgn0026197	noe	3L	17394448	The gene noe is referred to in FlyBase by the symbol Dmel\noe (CG32172, FBgn0026197). It is a protein_coding_gene from Drosophila melanogaster. Its sequence location is 3L:17393447..17394448. It has the cytological map location 74B1. Its molecular function is unknown. The biological processes in which it is involved are not known. One allele is reported. No phenotypic data is available. It has 2 …	2	0	0		99				altexon
FBgn0041605	cpx	3R	105906	The gene complexin is referred to in FlyBase by the symbol Dmel\cpx (CG32490, FBgn0041605). It is a protein_coding_gene from Drosophila melanogaster. Its sequence location is 3R:105906..128309. It has the cytological map location 82A1-82A3. Based on sequence similarity, it is predicted to have molecular function</span>: neurotransmitter transporter activity. There is experimental evidence that it…	14	0	0	5primeCassette		101			altexon
FBgn0004169	up	X	13496536	The gene upheld is referred to in FlyBase by the symbol Dmel\up (CG7107, FBgn0004169). It is a protein_coding_gene from Drosophila melanogaster. Its sequence location is X:13487610..13496536. It has the cytological map location 12A7. There is experimental evidence that it has the molecular function</span>: calcium ion binding. There is experimental evidence that it is involved in the biological p…	5	1.43168e-265	2.73784e-135					79
FBgn0003748	Treh	2R	16961530	The gene Trehalase is referred to in FlyBase by the symbol Dmel\Treh (CG9364, FBgn0003748). It is a protein_coding_gene from Drosophila melanogaster. Its sequence location is 2R:16961530..16975734. It has the cytological map location 57B16-57B19. There is experimental evidence that it has the molecular function</span>: trehalase activity. Based on sequence similarity, it is predicted to be involv…	4	4.26786e-229	9.3401e-236	5primeCassette		47			altexon
FBgn0004625	norpA	X	4216659	The gene no receptor potential A is referred to in FlyBase by the symbol Dmel\norpA (CG3620, FBgn0004625). It is a protein_coding_gene from Drosophila melanogaster. Its sequence location is X:4216659..4256487. It has the cytological map location 4B6-4C1. It is reported to have molecular function</span>: GTPase activator activity; phosphoinositide phospholipase C activity; phospholipase C activity…	3	1.85262e-218	1	5primeCassette		530			altexon
FBgn0003659	Sxl	X	6992086	The gene Sex lethal is referred to in FlyBase by the symbol Dmel\Sxl (CG18350, FBgn0003659). It is a protein_coding_gene from Drosophila melanogaster. Its sequence location is X:6969698..6992086. It has the cytological map location 6F3-6F5. There is experimental evidence that it has the molecular function</span>: poly-pyrimidine tract binding; protein binding; growth factor activity; mRNA 5'-UTR …	4	1.37846e-127	1		3primeCassette		3703	190	altexon
FBgn0004551	Ca-P60A	2R	19823408	The gene Calcium ATPase at 60A is referred to in FlyBase by the symbol Dmel\Ca-P60A (CG3725, FBgn0004551). It is a protein_coding_gene from Drosophila melanogaster. Its sequence location is 2R:19814479..19823408. It has the cytological map location 60A11-60A12. There is experimental evidence that it has the molecular function</span>: protein binding. There is experimental evidence that it is invo…	4	2.2328e-107	0	5primeCassette	3primeCassette	61	226		altexon
FBgn0005671	Vha55	3R	8453551	The gene Vacuolar H<sup>+</sup>-ATPase 55kD B subunit is referred to in FlyBase by the symbol Dmel\Vha55 (CG17369, FBgn0005671). It is a protein_coding_gene from Drosophila melanogaster. Its sequence location is 3R:8449484..8453551. It has the cytological map location 87C2-87C3. Based on sequence similarity, it is predicted to have molecular function</span>: hydrogen-exporting ATPase activity, ph…	3	8.12424e-106	0	13	545				altexon
FBgn0004652	fru	3R	14371308	The gene fruitless is referred to in FlyBase by the symbol Dmel\fru (CG14307, FBgn0004652). It is a protein_coding_gene from Drosophila melanogaster. Its sequence location is 3R:14242315..14371308. It has the cytological map location 91A7-91B3. It is reported to have molecular function</span>: RNA polymerase II transcription factor activity; transcription factor activity. There is experimental ev…	4	4.64966e-94	9.63988e-177						altexon
FBgn0064225	RpL5	2L	22429419	The gene Ribosomal protein L5 is referred to in FlyBase by the symbol Dmel\RpL5 (CG17489, FBgn0064225). It is a protein_coding_gene from Drosophila melanogaster. Its sequence location is 2L:22427533..22429419. It has the cytological map location 40F7. There is experimental evidence that it has the molecular function</span>: protein binding. Based on sequence similarity, it is predicted to be invo…	2	1.84818e-93	1.87595e-188	5primeCassette		67			altexon
FBgn0003721	Tm1	3R	11107254	The gene Tropomyosin 1 is referred to in FlyBase by the symbol Dmel\Tm1 (CG4898, FBgn0003721). It is a protein_coding_gene from Drosophila melanogaster. Its sequence location is 3R:11107254..11133702. It has the cytological map location 88E12-88E13. Based on sequence similarity, it is predicted to have molecular function</span>: actin binding. There is experimental evidence that it is involved in…	4	5.19631e-82	1.15344e-30					71
FBgn0030830	CG5172	X	17115475	This gene is referred to in FlyBase by the symbol Dmel\CG5172 (CG5172, FBgn0030830). It is a protein_coding_gene from Drosophila melanogaster. Its sequence location is X:17115475..17116682. It has the cytological map location 15F4. Its molecular function is unknown. The biological processes in which it is involved are not known. 2 alleles are reported. No phenotypic data is available. It has 2 an…	2	1.8901e-81	0		119				altexon
FBgn0003423	slgA	X	21245368	The gene sluggish A is referred to in FlyBase by the symbol Dmel\slgA (CG1417, FBgn0003423). It is a protein_coding_gene from Drosophila melanogaster. Its sequence location is X:21245368..21256188. It has the cytological map location 19F6-20A1. Based on sequence similarity, it is predicted to have molecular function</span>: proline dehydrogenase activity. There is experimental evidence that it is…	4	4.30596e-77	1.05263e-95	5primeCassette		481			altexon
FBgn0034412	abba	2R	14874846	The gene another B-box affiliate is referred to in FlyBase by the symbol Dmel\abba (CG15105, FBgn0034412). It is a protein_coding_gene from Drosophila melanogaster. Its sequence location is 2R:14874846..14896469. It has the cytological map location 56A2-56A3. An electronic pipeline based on InterPro domains suggests that it has the molecular function</span>: protein binding; zinc ion binding. The…	3	3.63199e-76	0	5primeCassette		351			altexon
FBgn0086778	gfA	X	19242477	The gene giant fibre A is referred to in FlyBase by the symbol Dmel\gfA (CG32538, FBgn0086778). It is a protein_coding_gene from Drosophila melanogaster. Its sequence location is X:19222594..19242477. It has the cytological map location 18C2-18C3. Based on sequence similarity, it is predicted to have molecular function</span>: nicotinic acetylcholine-activated cation-selective channel activity. T…	3	1.40558e-73	0.00111228						altexon
FBgn0013948	Eip93F	3R	17774836	The gene Eip93F is referred to in FlyBase by the symbol Dmel\Eip93F (CG18389, FBgn0013948). It is a protein_coding_gene from Drosophila melanogaster. Its sequence location is 3R:17774836..17837910. It has the cytological map location 93F14. It is reported to have molecular function</span>: DNA binding; transcription factor activity. There is experimental evidence that it is involved in the biolog…	2	1.51687e-71	8.14415e-161	5primeCassette	5385	289			altexon
FBgn0014163	fax	3L	16404939	The gene failed axon connections is referred to in FlyBase by the symbol Dmel\fax (CG4609, FBgn0014163). It is a protein_coding_gene from Drosophila melanogaster. Its sequence location is 3L:16396387..16404939. It has the cytological map location 72E5-72F1. Its molecular function is unknown. There is experimental evidence that it is involved in the biological process</span>: axonogenesis. 22 alle…	3	1.35077e-59	2.45606e-248	5primeCassette		838			altexon
FBgn0028704	Nckx30C	2L	9746483	The gene Nckx30C is referred to in FlyBase by the symbol Dmel\Nckx30C (CG18660, FBgn0028704). It is a protein_coding_gene from Drosophila melanogaster. Its sequence location is 2L:9716190..9746483. It has the cytological map location 30C6-30C7. There is experimental evidence that it has the molecular function</span>: calcium, potassium:sodium antiporter activity. There is experimental evidence th…	2	1.95066e-59	1	19					altexon
FBgn0005563	cac	X	11875209	The gene cacophony is referred to in FlyBase by the symbol Dmel\cac (CG1522, FBgn0005563). It is a protein_coding_gene from Drosophila melanogaster. Its sequence location is X:11827719..11875209. It has the cytological map location 10F8-10F11. There is experimental evidence that it has the molecular function</span>: voltage-gated calcium channel activity. There is experimental evidence for 12 uni…	3	1.48083e-58	1.07892e-13					101
FBgn0038294	Mf	3R	11006143	The gene Myofilin is referred to in FlyBase by the symbol Dmel\Mf (CG6803, FBgn0038294). It is a protein_coding_gene from Drosophila melanogaster. Its sequence location is 3R:10996347..11006143. It has the cytological map location 88E2. Its molecular function is unknown. It is reported to be involved in the biological process</span>: muscle thick filament assembly. 4 alleles are reported. No phen…	7	1.84225e-56	0					207
FBgn0029687	Vap-33-1	X	3843009	The gene Vap-33-1 is referred to in FlyBase by the symbol Dmel\Vap-33-1 (CG5014, FBgn0029687). It is a protein_coding_gene from Drosophila melanogaster. Its sequence location is X:3843009..3848138. It has the cytological map location 3F9. An electronic pipeline based on InterPro domains suggests that it has the molecular function</span>: structural molecule activity. There is experimental evidenc…	3	2.70713e-54	8.24615e-225						altexon
FBgn0002921	Atpalpha	3R	16774436	The gene Na pump Î± subunit is referred to in FlyBase by the symbol Dmel\AtpÎ± (CG5670, FBgn0002921). It is a protein_coding_gene from Drosophila melanogaster. Its sequence location is 3R:16774436..16801022. It has the cytological map location 93A4. There is experimental evidence that it has the molecular function</span>: sodium:potassium-exchanging ATPase activity; cation transmembrane transport…	4	1.12172e-49	0	5primeCassette	969	116		95	altexon
FBgn0261014	TER94	2R	5876666	The gene TER94 is referred to in FlyBase by the symbol Dmel\TER94 (CG2331, FBgn0261014). It is a protein_coding_gene from Drosophila melanogaster. Its sequence location is 2R:5876666..5881072. It has the cytological map location 46D-46D1. It is reported to have molecular function</span>: ATPase activity. There is experimental evidence that it is involved in the biological process</span>: protein …	2	1.55583e-49	1.57663e-125	45	4			103	altexon
FBgn0013342	n-syb	3L	1637767	The gene n-synaptobrevin is referred to in FlyBase by the symbol Dmel\n-syb (CG17248, FBgn0013342). It is a protein_coding_gene from Drosophila melanogaster. Its sequence location is 3L:1631910..1637767. It has the cytological map location 62A9. Based on sequence similarity, it is predicted to have molecular function</span>: SNAP receptor activity. Based on sequence similarity, it is predicted to…	4	4.23194e-46	9.12002e-271		283			73	altexon
FBgn0004828	His3.3B	X	9050721	The gene Histone H3.3B is referred to in FlyBase by the symbol Dmel\His3.3B (CG8989, FBgn0004828). It is a protein_coding_gene from Drosophila melanogaster. Its sequence location is X:9047271..9050721. It has the cytological map location 8C14. Based on sequence similarity, it is predicted to have molecular function</span>: DNA binding. There is experimental evidence that it is involved in the bio…	2	7.36351e-46	0.0127231	5primeCassette		109		221
FBgn0086708	stv	3L	13470653	The gene starvin is referred to in FlyBase by the symbol Dmel\stv (CG32130, FBgn0086708). It is a protein_coding_gene from Drosophila melanogaster. Its sequence location is 3L:13470653..13476621. It has the cytological map location 70B2. An electronic pipeline based on InterPro domains suggests that it has the molecular function</span>: protein binding; serine-type endopeptidase activity. An elec…	4	8.68634e-46	4.35981e-54						altexon
FBgn0043070	MESK2	2R	17389591	The gene Misexpression suppressor of KSR 2 is referred to in FlyBase by the symbol Dmel\MESK2 (CG15669, FBgn0043070). It is a protein_coding_gene from Drosophila melanogaster. Its sequence location is 2R:17389591..17404747. It has the cytological map location 57E8-57E9. Its molecular function is unknown. The biological processes in which it is involved are not known. 25 alleles are reported. The …	7	1.03471e-42	6.12047e-68	213				428	altexon
FBgn0004242	Syt1	2L	2799970	The gene Synaptotagmin 1 is referred to in FlyBase by the symbol Dmel\Syt1 (CG3139, FBgn0004242). It is a protein_coding_gene from Drosophila melanogaster. Its sequence location is 2L:2780741..2799970. It has the cytological map location 23A6-23B1. There is experimental evidence that it has the molecular function</span>: protein binding. There is experimental evidence that it is involved in the b…	4	1.10126e-41	4.09548e-74					351
FBgn0013759	Caki	3R	17648364	The gene Calcium/calmodulin-dependent protein kinase is referred to in FlyBase by the symbol Dmel\Caki (CG6703, FBgn0013759). It is a protein_coding_gene from Drosophila melanogaster. Its sequence location is 3R:17611484..17648364. It has the cytological map location 93F10-93F12. There is experimental evidence that it has the molecular function</span>: calmodulin-dependent protein kinase activity…	6	5.05772e-41	4.01935e-55	5primeCassette		160		136	altexon
FBgn0004907	14-3-3zeta	2R	5987184	The gene 14-3-3Î¶ is referred to in FlyBase by the symbol Dmel\14-3-3Î¶ (CG17870, FBgn0004907). It is a protein_coding_gene from Drosophila melanogaster. Its sequence location is 2R:5987184..5997192. It has the cytological map location 46E6-46E8. There is experimental evidence that it has the molecular function</span>: protein binding. There is experimental evidence that it is involved in the bio…	5	2.03767e-40	0		730			164	altexon
FBgn0259214	PMCA	4	379298	The gene plasma membrane calcium ATPase is referred to in FlyBase by the symbol Dmel\PMCA (CG42314, FBgn0259214). It is a protein_coding_gene from Drosophila melanogaster. Its sequence location is 4:349442..379298. It has the cytological map location 102B5. Based on sequence similarity, it is predicted to have molecular function</span>: calcium-transporting ATPase activity. There is experimental …	6	2.1461e-40	5.18113e-223					69
FBgn0004624	CaMKII	4	1074329	The gene Calcium/calmodulin-dependent protein kinase II is referred to in FlyBase by the symbol Dmel\CaMKII (CG18069, FBgn0004624). It is a protein_coding_gene from Drosophila melanogaster. Its sequence location is 4:1056643..1074329. It has the cytological map location 102F6-102F7. There is experimental evidence that it has the molecular function</span>: protein serine/threonine kinase activity;…	6	3.07292e-37	8.19175e-136	5primeCassette	1138	206		26	altexon
FBgn0000557	Ef1alpha100E	3R	27564190	The gene Elongation factor 1Î±100E is referred to in FlyBase by the symbol Dmel\Ef1Î±100E (CG1873, FBgn0000557). It is a protein_coding_gene from Drosophila melanogaster. Its sequence location is 3R:27564190..27569028. It has the cytological map location 100D2. Based on sequence similarity, it is predicted to have molecular function</span>: translation elongation factor activity. Based on sequenc…	3	3.55501e-37	6.59734e-27	5primeCassette		62			altexon
FBgn0003392	shi	X	15786149	The gene shibire is referred to in FlyBase by the symbol Dmel\shi (CG18102, FBgn0003392). It is a protein_coding_gene from Drosophila melanogaster. Its sequence location is X:15786149..15800285. It has the cytological map location 13F18. There is experimental evidence that it has the molecular function</span>: actin binding; microtubule binding. There is experimental evidence for 29 unique biolog…	6	2.36063e-32	0	5primeCassette	3primeCassette	69	479	6	altexon
FBgn0004028	wupA	X	18010855	The gene wings up A is referred to in FlyBase by the symbol Dmel\wupA (CG7178, FBgn0004028). It is a protein_coding_gene from Drosophila melanogaster. Its sequence location is X:17999586..18010855. It has the cytological map location 16F7. It is reported to have molecular function</span>: tropomyosin binding; actin binding. There is experimental evidence that it is involved in the biological proc…	4	4.00352e-32	1.05483236728515e-315					101
FBgn0015772	Nak	2L	18968721	The gene Numb-associated kinase is referred to in FlyBase by the symbol Dmel\Nak (CG10637, FBgn0015772). It is a protein_coding_gene from Drosophila melanogaster. Its sequence location is 2L:18957900..18968721. It has the cytological map location 37B7. There is experimental evidence that it has the molecular function</span>: protein binding. There is experimental evidence that it is involved in t…	3	2.4156e-31	2.8524e-100		3primeCassette		2781		altexon
FBgn0025631	moody	X	1943620	The gene moody is referred to in FlyBase by the symbol Dmel\moody (CG4322, FBgn0025631). It is a protein_coding_gene from Drosophila melanogaster. Its sequence location is X:1938325..1943620. It has the cytological map location 2C7-2C8. Based on sequence similarity, it is predicted to have molecular function</span>: G-protein coupled receptor activity; melatonin receptor activity. There is experi…	3	7.1229e-31	1.9299e-27	5primeCassette		392			altexon
FBgn0014362	mub	3L	21872710	The gene mushroom-body expressed is referred to in FlyBase by the symbol Dmel\mub (CG7437, FBgn0014362). It is a protein_coding_gene from Drosophila melanogaster. Its sequence location is 3L:21872710..21919801. It has the cytological map location 79A2-79A3. Based on sequence similarity, it is predicted to have molecular function</span>: poly(C) RNA binding. There is experimental evidence that it …	3	2.74193e-30	3.13261e-32		476				altexon
FBgn0261794	kcc	2R	19795651	The gene kazachoc is referred to in FlyBase by the symbol Dmel\kcc (CG5594, FBgn0261794). It is a protein_coding_gene from Drosophila melanogaster. Its sequence location is 2R:19795651..19812619. It has the cytological map location 60A9-60A11. Based on sequence similarity, it is predicted to have molecular function</span>: amino acid transmembrane transporter activity; potassium:chloride symporte…	3	8.03586e-30	0.0118985	5primeCassette	30	504		161	altexon
FBgn0085450	Snoo	2L	7984158	The gene Sno oncogene is referred to in FlyBase by the symbol Dmel\Snoo (CG34421, FBgn0085450). It is a protein_coding_gene from Drosophila melanogaster. Its sequence location is 2L:7892316..7984158. It has the cytological map location 28D3. An electronic pipeline based on InterPro domains suggests that it has the molecular function</span>: protein binding; nucleotide binding. There is experiment…	4	1.15877e-29	4.16884e-130						altexon
FBgn0037796	CG12814	3R	6013742	This gene is referred to in FlyBase by the symbol Dmel\CG12814 (CG12814, FBgn0037796). It is a protein_coding_gene from Drosophila melanogaster. Its sequence location is 3R:5996877..6013742. It has the cytological map location 85F16. Its molecular function is unknown. The biological processes in which it is involved are not known. 4 alleles are reported. No phenotypic data is available. It has 2 …	2	1.55591e-29	1.0271e-06	5primeCassette		75			altexon
FBgn0003435	sm	2R	15519007	The gene smooth is referred to in FlyBase by the symbol Dmel\sm (CG9218, FBgn0003435). It is a protein_coding_gene from Drosophila melanogaster. Its sequence location is 2R:15417414..15519007. It has the cytological map location 56D15-56E1. Based on sequence similarity, it is predicted to have molecular function</span>: mRNA binding. There is experimental evidence that it is involved in the biolo…	3	3.09961e-29	2.48908e-72	1					altexon
FBgn0013733	shot	2R	9829615	The gene short stop is referred to in FlyBase by the symbol Dmel\shot (CG18076, FBgn0013733). It is a protein_coding_gene from Drosophila melanogaster. Its sequence location is 2R:9751742..9829615. It has the cytological map location 50C6-50C9. There is experimental evidence that it has the molecular function</span>: protein binding. There is experimental evidence that it is involved in the biolo…	5	9.08218e-29	8.9328493673993e-311	5primeCassette		194		60	altexon
FBgn0005616	msl-2	2L	3466111	The gene male-specific lethal 2 is referred to in FlyBase by the symbol Dmel\msl-2 (CG3241, FBgn0005616). It is a protein_coding_gene from Drosophila melanogaster. Its sequence location is 2L:3462213..3466111. It has the cytological map location 23F3. There is experimental evidence that it has the molecular function</span>: chromatin binding. There is experimental evidence that it is involved in …	2	2.79979e-28	1						altexon
FBgn0261671	tweek	2L	16889003	The gene tweek is referred to in FlyBase by the symbol Dmel\tweek (CG42555, FBgn0261671). It is a protein_coding_gene from Drosophila melanogaster. Its sequence location is 2L:16889003..16917052. It has the cytological map location 36B4. Its molecular function is unknown. There is experimental evidence that it is involved in the biological process</span>: synaptic vesicle endocytosis. 11 alleles …	2	4.28286e-28	1						altexon
FBgn0261802	CG42748	2L	22134351	This gene is referred to in FlyBase by the symbol Dmel\CG42748 (CG42748, FBgn0261802). It is a protein_coding_gene from Drosophila melanogaster. Its sequence location is 2L:22134351..22164838. It has the cytological map location 40F1. An electronic pipeline based on InterPro domains suggests that it has the molecular function</span>: zinc ion binding. The biological processes in which it is invol…	4	5.79951e-28	3.27939e-53	5primeCassette		241			altexon
FBgn0034237	eIF3-S9	2R	13423718	The gene eIF3-S9 is referred to in FlyBase by the symbol Dmel\eIF3-S9 (CG4878, FBgn0034237). It is a protein_coding_gene from Drosophila melanogaster. Its sequence location is 2R:13423718..13426647. It has the cytological map location 54C3. Based on sequence similarity, it is predicted to have molecular function</span>: mRNA binding; translation initiation factor activity. Based on sequence simil…	2	6.25274e-28	1.55547e-144		79				altexon
FBgn0259243	Pka-R1	3L	20809205	The gene cAMP-dependent protein kinase R1 is referred to in FlyBase by the symbol Dmel\Pka-R1 (CG42341, FBgn0259243). It is a protein_coding_gene from Drosophila melanogaster. Its sequence location is 3L:20809205..20829148. It has the cytological map location 77E8-77F1. There is experimental evidence that it has the molecular function</span>: cAMP-dependent protein kinase regulator activity. Ther…	4	7.58181e-28	3.10134e-53	5primeCassette	1390	712			altexon
FBgn0026439	Eaat1	2L	9333568	The gene Excitatory amino acid transporter 1 is referred to in FlyBase by the symbol Dmel\Eaat1 (CG3747, FBgn0026439). It is a protein_coding_gene from Drosophila melanogaster. Its sequence location is 2L:9333568..9341625. It has the cytological map location 30A8. There is experimental evidence that it has the molecular function</span>: L-glutamate transmembrane transporter activity; glutamate:so…	2	5.03539e-27	5.63285e-198	22					altexon
FBgn0032497	CG6043	2L	13261010	This gene is referred to in FlyBase by the symbol Dmel\CG6043 (CG6043, FBgn0032497). It is a protein_coding_gene from Drosophila melanogaster. Its sequence location is 2L:13261010..13284043. It has the cytological map location 34B3-34B4. Its molecular function is unknown. The biological processes in which it is involved are not known. 4 alleles are reported. No phenotypic data is available. It ha…	3	2.29042e-26	5.5379e-24					278
FBgn0016694	Pdp1	3L	7860472	The gene PAR-domain protein 1 is referred to in FlyBase by the symbol Dmel\Pdp1 (CG17888, FBgn0016694). It is a protein_coding_gene from Drosophila melanogaster. Its sequence location is 3L:7807437..7860472. It has the cytological map location 66A14-66A17. There is experimental evidence that it has the molecular function</span>: DNA binding. There is experimental evidence that it is involved in t…	6	1.23937e-25	1.0265e-188	5primeCassette		272		343	altexon
FBgn0035895	Unr	3L	8431786	The gene Upstream of N-ras is referred to in FlyBase by the symbol Dmel\Unr (CG7015, FBgn0035895). It is a protein_coding_gene from Drosophila melanogaster. Its sequence location is 3L:8427149..8431786. It has the cytological map location 66C12-66C13. There is experimental evidence that it has the molecular function</span>: protein binding; mRNA 3'-UTR binding; mRNA binding. There is experimental…	2	1.82782e-25	1						altexon
FBgn0014037	Su(Tpl)	3L	19902500	The gene Su(Tpl) is referred to in FlyBase by the symbol Dmel\Su(Tpl) (CG32217, FBgn0014037). It is a protein_coding_gene from Drosophila melanogaster. Its sequence location is 3L:19884505..19902500. It has the cytological map location 76D3-76D4. Based on sequence similarity, it is predicted to have molecular function</span>: transcription elongation regulator activity; RNA polymerase II transcri…	2	4.74473e-25	1						altexon
FBgn0038143	CG9813	3R	9205494	This gene is referred to in FlyBase by the symbol Dmel\CG9813 (CG9813, FBgn0038143). It is a protein_coding_gene from Drosophila melanogaster. Its sequence location is 3R:9198821..9205494. It has the cytological map location 87E8. An electronic pipeline based on InterPro domains suggests that it has the molecular function</span>: ATP binding. The biological processes in which it is involved are n…	5	1.60726e-24	3.59516e-118						altexon
FBgn0000504	dsx	3R	3793130	The gene doublesex is referred to in FlyBase by the symbol Dmel\dsx (CG11094, FBgn0000504). It is a protein_coding_gene from Drosophila melanogaster. Its sequence location is 3R:3750045..3793130. It has the cytological map location 84E5-84E6. There is experimental evidence that it has the molecular function</span>: protein binding; protein homodimerization activity. There is experimental evidence…	3	3.31994e-24	2.2538e-24		3primeCassette		1038		altexon
FBgn0053113	Rtnl1	2L	5009744	The gene Rtnl1 is referred to in FlyBase by the symbol Dmel\Rtnl1 (CG33113, FBgn0053113). It is a protein_coding_gene from Drosophila melanogaster. Its sequence location is 2L:4993641..5009744. It has the cytological map location 25B9-25C1. Its molecular function is unknown. There is experimental evidence that it is involved in the biological process</span>: inter-male aggressive behavior; olfact…	7	1.70109e-23	7.20844e-43	5primeCassette	505	1564			altexon
FBgn0260934	par-1	2R	15343679	The gene par-1 is referred to in FlyBase by the symbol Dmel\par-1 (CG8201, FBgn0260934). It is a protein_coding_gene from Drosophila melanogaster. Its sequence location is 2R:15343679..15371978. It has the cytological map location 56D9-57D12. There is experimental evidence that it has the molecular function</span>: tau-protein kinase activity; protein kinase activity. There is experimental eviden…	4	1.80488e-23	2.70416e-09	5primeCassette	3primeCassette	802	1125	114	altexon
FBgn0015754	Lis-1	2R	12066309	The gene Lissencephaly-1 is referred to in FlyBase by the symbol Dmel\Lis-1 (CG8440, FBgn0015754). It is a protein_coding_gene from Drosophila melanogaster. Its sequence location is 2R:12066309..12072612. It has the cytological map location 52F4-52F5. Based on sequence similarity, it is predicted to have molecular function</span>: ATPase activity, coupled; dynein binding; enzyme regulator activit…	3	1.08964e-22	2.13031e-21	5primeCassette		149			altexon
FBgn0038984	CG5315	3R	18373567	This gene is referred to in FlyBase by the symbol Dmel\CG5315 (CG5315, FBgn0038984). It is a protein_coding_gene from Drosophila melanogaster. Its sequence location is 3R:18369414..18373567. It has the cytological map location 94B3. Based on sequence similarity, it is predicted to have molecular function</span>: hormone binding. Based on sequence similarity, it is predicted to be involved in the …	3	1.78188e-22	1.30333e-78	5primeCassette	6	187		156	altexon
FBgn0260657	CG42540	3L	4556087	This gene is referred to in FlyBase by the symbol Dmel\CG42540 (CG42540, FBgn0260657). It is a protein_coding_gene from Drosophila melanogaster. Its sequence location is 3L:4556087..4592295. It has the cytological map location 64B11. Its molecular function is unknown. The biological processes in which it is involved are not known. 6 alleles are reported. No phenotypic data is available. It has 4 …	3	5.41698e-21	1.0314e-42	5primeCassette		100		36	altexon
FBgn0086904	Nacalpha	2R	8648377	The gene Nascent polypeptide associated complex protein alpha subunit is referred to in FlyBase by the symbol Dmel\NacÎ± (CG8759, FBgn0086904). It is a protein_coding_gene from Drosophila melanogaster. Its sequence location is 2R:8647198..8648377. It has the cytological map location 49C2-49C3. There is experimental evidence that it has the molecular function</span>: protein binding. There is expe…	3	1.63586e-20	1	5primeCassette	5	50		41	altexon
FBgn0028494	CG6424	2R	13606832	This gene is referred to in FlyBase by the symbol Dmel\CG6424 (CG6424, FBgn0028494). It is a protein_coding_gene from Drosophila melanogaster. Its sequence location is 2R:13590840..13606832. It has the cytological map location 54E1. Its molecular function is unknown. The biological processes in which it is involved are not known. 18 alleles are reported. No phenotypic data is available. It has 3 …	3	1.98015e-20	4.44166e-30	5primeCassette		154			altexon
FBgn0033484	CG2269	2R	5975076	This gene is referred to in FlyBase by the symbol Dmel\CG2269 (CG2269, FBgn0033484). It is a protein_coding_gene from Drosophila melanogaster. Its sequence location is 2R:5975076..5983921. It has the cytological map location 46E4. Its molecular function is unknown. The biological processes in which it is involved are not known. 5 alleles are reported. No phenotypic data is available. It has 3 ann…	3	2.07031e-20	1.34159e-29	2					altexon
FBgn0260945	Atg1	3L	12798214	The gene Autophagy-specific gene 1 is referred to in FlyBase by the symbol Dmel\Atg1 (CG10967, FBgn0260945). It is a protein_coding_gene from Drosophila melanogaster. Its sequence location is 3L:12777529..12798214. It has the cytological map location 69E2-69E4. There is experimental evidence that it has the molecular function</span>: kinesin binding; protein kinase activity. There is experimental…	2	2.86862e-20	4.97882e-80	29	702				altexon
FBgn0034886	Pde8	2R	19545099	The gene Phosphodiesterase 8 is referred to in FlyBase by the symbol Dmel\Pde8 (CG5411, FBgn0034886). It is a protein_coding_gene from Drosophila melanogaster. Its sequence location is 2R:19545099..19568368. It has the cytological map location 59F5-59F6. There is experimental evidence that it has the molecular function</span>: 3',5'-cyclic-AMP phosphodiesterase activity. There is experimental evi…	4	7.00647e-20	5.22463e-10	5primeCassette	1737	439			altexon
FBgn0015024	CkIalpha	X	12547816	The gene Casein kinase IÎ± is referred to in FlyBase by the symbol Dmel\CkIÎ± (CG2028, FBgn0015024). It is a protein_coding_gene from Drosophila melanogaster. Its sequence location is X:12547816..12551354. It has the cytological map location 11B7. There is experimental evidence that it has the molecular function</span>: protein kinase activity. There is experimental evidence that it is involved i…	2	5.14639e-19	1.9247e-07	5primeCassette	46	386			altexon
FBgn0028645	beat-Ib	2L	15962432	The gene beaten path Ib is referred to in FlyBase by the symbol Dmel\beat-Ib (CG7644, FBgn0028645). It is a protein_coding_gene from Drosophila melanogaster. Its sequence location is 2L:15905134..15962432. It has the cytological map location 35D6-35D7. Its molecular function is unknown. It is reported to be involved in the biological process</span>: axon choice point recognition; defasciculation …	2	8.42916e-19	9.59236e-22						altexon
FBgn0052423	shep	3L	5271044	The gene alan shepard is referred to in FlyBase by the symbol Dmel\shep (CG32423, FBgn0052423). It is a protein_coding_gene from Drosophila melanogaster. Its sequence location is 3L:5153786..5271044. It has the cytological map location 64C8-64C11. Based on sequence similarity, it is predicted to have molecular function</span>: mRNA binding. There is experimental evidence that it is involved in th…	5	9.56522e-19	1.4819e-104						altexon
FBgn0016977	spen	2L	159034	The gene split ends is referred to in FlyBase by the symbol Dmel\spen (CG18497, FBgn0016977). It is a protein_coding_gene from Drosophila melanogaster. Its sequence location is 2L:159034..203251. It has the cytological map location 21B3-21B4. There is experimental evidence that it has the molecular function</span>: transcription regulator activity. There is experimental evidence for 12 unique bio…	3	1.15779e-18	1	5primeCassette		786			altexon
FBgn0030412	tomosyn	X	12525653	The gene tomosyn is referred to in FlyBase by the symbol Dmel\tomosyn (CG17762, FBgn0030412). It is a protein_coding_gene from Drosophila melanogaster. Its sequence location is X:12525653..12547377. It has the cytological map location 11B6-11B7. Based on sequence similarity, it is predicted to have molecular function</span>: syntaxin-1 binding. Based on sequence similarity, it is predicted to be …	5	1.67705e-18	6.22822e-60					895	altexon
FBgn0028397	Tob	X	15985369	The gene Tob is referred to in FlyBase by the symbol Dmel\Tob (CG9214, FBgn0028397). It is a protein_coding_gene from Drosophila melanogaster. Its sequence location is X:15973047..15985369. It has the cytological map location 14A8. Its molecular function is unknown. Based on sequence similarity, it is predicted to be involved in the biological process</span>: negative regulation of cell prolifera…	2	2.70965e-18	6.16797e-42	2					altexon
FBgn0050035	CG30035	2R	7553259	This gene is referred to in FlyBase by the symbol Dmel\CG30035 (CG30035, FBgn0050035). It is a protein_coding_gene from Drosophila melanogaster. Its sequence location is 2R:7553259..7562287. It has the cytological map location 48B6-48B7. Based on sequence similarity, it is predicted to have molecular function</span>: glucose transmembrane transporter activity. Based on sequence similarity, it is …	2	5.56383e-18	1	5primeCassette		64			altexon
FBgn0037643	skap	3R	4764405	The gene skpA associated protein is referred to in FlyBase by the symbol Dmel\skap (CG11963, FBgn0037643). It is a protein_coding_gene from Drosophila melanogaster. Its sequence location is 3R:4764405..4768749. It has the cytological map location 85B7. Based on sequence similarity, it is predicted to have molecular function</span>: succinate-CoA ligase (ADP-forming) activity. There is experimenta…	3	7.6215e-18	3.3361e-214		3primeCassette		350	3	altexon
FBgn0031294	ia2	2L	1048053	The gene ia2 is referred to in FlyBase by the symbol Dmel\ia2 (CG31795, FBgn0031294). It is a protein_coding_gene from Drosophila melanogaster. Its sequence location is 2L:1011421..1048053. It has the cytological map location 21E3. Based on sequence similarity, it is predicted to have molecular function</span>: transmembrane receptor protein tyrosine phosphatase activity. It is reported to be inv…	2	1.42699e-17	1.15547e-189	5primeCassette		98		262	altexon
FBgn0015622	Cnx99A	3R	25145366	The gene Calnexin 99A is referred to in FlyBase by the symbol Dmel\Cnx99A (CG11958, FBgn0015622). It is a protein_coding_gene from Drosophila melanogaster. Its sequence location is 3R:25140965..25145366. It has the cytological map location 99A7. Based on sequence similarity, it is predicted to have molecular function</span>: unfolded protein binding. It is reported to be involved in the biologica…	2	1.90142e-17	1.86249e-71					126
FBgn0001991	Ca-alpha1D	2L	16170657	The gene Ca<sup>2+</sup>-channel protein Î±<down>1</down> subunit D is referred to in FlyBase by the symbol Dmel\Ca-Î±1D (CG4894, FBgn0001991). It is a protein_coding_gene from Drosophila melanogaster. Its sequence location is 2L:16170657..16190086. It has the cytological map location 35E5-35E6. Based on sequence similarity, it is predicted to have molecular function</span>: voltage-gated calcium…	3	3.00603e-17	2.16007e-79					41
FBgn0032467	CG9934	2L	13019434	This gene is referred to in FlyBase by the symbol Dmel\CG9934 (CG9934, FBgn0032467). It is a protein_coding_gene from Drosophila melanogaster. Its sequence location is 2L:13013388..13019434. It has the cytological map location 34A4. An electronic pipeline based on InterPro domains suggests that it has the molecular function</span>: protein binding; ubiquitin-ubiquitin ligase activity. Based on se…	2	3.54884e-17	0.445365						altexon
FBgn0005278	Sam-S	2L	106903	The gene S-adenosylmethionine Synthetase is referred to in FlyBase by the symbol Dmel\Sam-S (CG2674, FBgn0005278). It is a protein_coding_gene from Drosophila melanogaster. Its sequence location is 2L:106903..114433. It has the cytological map location 21B2. Based on sequence similarity, it is predicted to have molecular function</span>: methionine adenosyltransferase activity. There is experimen…	4	3.90781e-17	1	5primeCassette	1	79			altexon
FBgn0040002	CG17683	2R	18442	This gene is referred to in FlyBase by the symbol Dmel\CG17683 (CG17683, FBgn0040002). It is a protein_coding_gene from Drosophila melanogaster. Its sequence location is 2R:18442..20468. Its molecular function is unknown. The biological processes in which it is involved are not known. No alleles are reported. It has 5 annotated transcripts and 5 annotated polypeptides.	3	5.73572e-17	5.49616e-39	5primeCassette		143			altexon
FBgn0010434	cora	2R	15116570	The gene coracle is referred to in FlyBase by the symbol Dmel\cora (CG11949, FBgn0010434). It is a protein_coding_gene from Drosophila melanogaster. Its sequence location is 2R:15116570..15131256. It has the cytological map location 56C4. Based on sequence similarity, it is predicted to have molecular function</span>: cytoskeletal protein binding. There is experimental evidence that it is involve…	2	5.79767e-17	1.33019e-66					2997
FBgn0004598	Fur2	X	16267121	The gene Furin 2 is referred to in FlyBase by the symbol Dmel\Fur2 (CG18734, FBgn0004598). It is a protein_coding_gene from Drosophila melanogaster. Its sequence location is X:16267121..16275816. It has the cytological map location 14C1-14C2. There is experimental evidence that it has the molecular function</span>: serine-type endopeptidase activity. It is reported to be involved in the biologica…	3	1.26841e-16	4.09993e-105	17	238				altexon
FBgn0010263	Rbp9	2L	2954762	The gene RNA-binding protein 9 is referred to in FlyBase by the symbol Dmel\Rbp9 (CG3151, FBgn0010263). It is a protein_coding_gene from Drosophila melanogaster. Its sequence location is 2L:2954762..2968434. It has the cytological map location 23C3. Based on sequence similarity, it is predicted to have molecular function</span>: mRNA binding. It is reported to be involved in the biological proces…	3	1.48336e-16	2.72285e-17	5primeCassette		354			altexon
FBgn0011693	Pdh	3L	16347397	The gene Photoreceptor dehydrogenase is referred to in FlyBase by the symbol Dmel\Pdh (CG4899, FBgn0011693). It is a protein_coding_gene from Drosophila melanogaster. Its sequence location is 3L:16346327..16347397. It has the cytological map location 72E2. An electronic pipeline based on InterPro domains suggests that it has the molecular function</span>: binding; alcohol dehydrogenase (NAD) acti…	2	1.52414e-16	1.57203e-05	4					altexon
FBgn0003660	Syb	2R	6139914	The gene Synaptobrevin is referred to in FlyBase by the symbol Dmel\Syb (CG12210, FBgn0003660). It is a protein_coding_gene from Drosophila melanogaster. Its sequence location is 2R:6136940..6139914. It has the cytological map location 46F8. Based on sequence similarity, it is predicted to have molecular function</span>: SNAP receptor activity. Based on sequence similarity, it is predicted to be …	4	1.74829e-16	1					218
FBgn0029663	CG10804	X	3376355	This gene is referred to in FlyBase by the symbol Dmel\CG10804 (CG10804, FBgn0029663). It is a protein_coding_gene from Drosophila melanogaster. Its sequence location is X:3370709..3376355. It has the cytological map location 3D4. Based on sequence similarity, it is predicted to have molecular function</span>: neurotransmitter:sodium symporter activity; neurotransmitter transporter activity. Base…	2	4.35658e-16	4.08473e-37						altexon
FBgn0041182	TepII	2L	7701585	The gene Thiolester containing protein II is referred to in FlyBase by the symbol Dmel\TepII (CG7052, FBgn0041182). It is a protein_coding_gene from Drosophila melanogaster. Its sequence location is 2L:7693800..7701585. It has the cytological map location 28C1. Based on sequence similarity, it is predicted to have molecular function</span>: peptidase inhibitor activity. There is experimental evid…	5	4.47814e-16	0.000615845					151
FBgn0028875	nAcRalpha-34E	2L	14040171	The gene nicotinic Acetylcholine Receptor Î± 34E is referred to in FlyBase by the symbol Dmel\nAcRÎ±-34E (CG32975, FBgn0028875). It is a protein_coding_gene from Drosophila melanogaster. Its sequence location is 2L:14040171..14089437. It has the cytological map location 34F2-34F4. There is experimental evidence that it has the molecular function</span>: acetylcholine binding. An electronic pipeli…	3	4.75785e-16	1.54315e-17						altexon
FBgn0020386	Pk61C	3L	129452	The gene Protein kinase 61C is referred to in FlyBase by the symbol Dmel\Pk61C (CG1210, FBgn0020386). It is a protein_coding_gene from Drosophila melanogaster. Its sequence location is 3L:129452..145293. It has the cytological map location 61B1. Based on sequence similarity, it is predicted to have molecular function</span>: protein serine/threonine kinase activity. There is experimental evidence…	6	5.47671e-16	7.73701e-44	10					altexon
FBgn0013576	l(3)82Fd	3R	1176165	The gene l(3)82Fd is referred to in FlyBase by the symbol Dmel\l(3)82Fd (CG32464, FBgn0013576). It is a protein_coding_gene from Drosophila melanogaster. Its sequence location is 3R:1098665..1176165. It has the cytological map location 82F8-82F10. Its molecular function is unknown. An electronic pipeline based on InterPro domains suggests that it is involved in the biological process</span>: cell…	10	7.73094e-16	2.57213e-137	5primeCassette		194		212	altexon
FBgn0045823	vsg	3L	9707420	The gene visgun is referred to in FlyBase by the symbol Dmel\vsg (CG16707, FBgn0045823). It is a protein_coding_gene from Drosophila melanogaster. Its sequence location is 3L:9707420..9710816. It has the cytological map location 67C5. Its molecular function is unknown. There is experimental evidence that it is involved in the biological process</span>: olfactory learning; learning or memory; regu…	3	9.67695e-16	2.70608e-22	15					altexon
FBgn0003261	Rm62	3R	1834301	The gene Rm62 is referred to in FlyBase by the symbol Dmel\Rm62 (CG10279, FBgn0003261). It is a protein_coding_gene from Drosophila melanogaster. Its sequence location is 3R:1826153..1834301. It has the cytological map location 83D1-83D2. There is experimental evidence that it has the molecular function</span>: protein binding. There is experimental evidence that it is involved in the biological …	3	2.91581e-15	1	6				153	altexon
FBgn0086687	desat1	3R	8265322	The gene desat1 is referred to in FlyBase by the symbol Dmel\desat1 (CG5887, FBgn0086687). It is a protein_coding_gene from Drosophila melanogaster. Its sequence location is 3R:8265322..8273338. It has the cytological map location 87B10-87B11. Based on sequence similarity, it is predicted to have molecular function</span>: stearoyl-CoA 9-desaturase activity. There is experimental evidence that it…	3	1.70401e-14	1	5primeCassette		112			altexon
FBgn0003520	stau	2R	14013337	The gene staufen is referred to in FlyBase by the symbol Dmel\stau (CG5753, FBgn0003520). It is a protein_coding_gene from Drosophila melanogaster. Its sequence location is 2R:14005401..14013337. It has the cytological map location 55B5-55B7. There is experimental evidence that it has the molecular function</span>: mRNA 3'-UTR binding. There is experimental evidence that it is involved in the bio…	3	2.75256e-14	9.08683e-97	5primeCassette	1728	278			altexon
FBgn0036211	CG5946	3L	11815375	This gene is referred to in FlyBase by the symbol Dmel\CG5946 (CG5946, FBgn0036211). It is a protein_coding_gene from Drosophila melanogaster. Its sequence location is 3L:11810083..11815375. It has the cytological map location 68E1. Based on sequence similarity, it is predicted to have molecular function</span>: cytochrome-b5 reductase activity. There is experimental evidence that it is involved …	4	3.75551e-14	6.70724e-27		3primeCassette		334		altexon
FBgn0032946	nrv3	2L	21380000	The gene nervana 3 is referred to in FlyBase by the symbol Dmel\nrv3 (CG8663, FBgn0032946). It is a protein_coding_gene from Drosophila melanogaster. Its sequence location is 2L:21380000..21390347. It has the cytological map location 39D2. It is reported to have molecular function</span>: sodium:potassium-exchanging ATPase activity. An electronic pipeline based on InterPro domains suggests that i…	2	5.07034e-14	2.19171e-105	5primeCassette		362			altexon
FBgn0014863	Mlp84B	3R	2943453	The gene Muscle LIM protein at 84B is referred to in FlyBase by the symbol Dmel\Mlp84B (CG1019, FBgn0014863). It is a protein_coding_gene from Drosophila melanogaster. Its sequence location is 3R:2939244..2943453. It has the cytological map location 84C1. There is experimental evidence that it has the molecular function</span>: structural constituent of muscle. There is experimental evidence that…	2	5.1119e-14	1	5primeCassette		81		63
FBgn0002579	RpL36	X	523495	The gene Ribosomal protein L36 is referred to in FlyBase by the symbol Dmel\RpL36 (CG7622, FBgn0002579). It is a protein_coding_gene from Drosophila melanogaster. Its sequence location is X:522350..523495. It has the cytological map location 1B12. Based on sequence similarity, it is predicted to have molecular function</span>: structural constituent of ribosome. Based on sequence similarity, it i…	3	7.49993e-14	1.38931e-25	53					altexon
FBgn0259745	wech	2R	3377368	The gene wech is referred to in FlyBase by the symbol Dmel\wech (CG42396, FBgn0259745). It is a protein_coding_gene from Drosophila melanogaster. Its sequence location is 2R:3369381..3377368. It has the cytological map location 43C5. Its molecular function is unknown. The biological processes in which it is involved are not known. 20 alleles are reported. The phenotypes of these alleles are annot…	3	8.26264e-14	1.73571e-07	25					altexon
FBgn0013799	Deaf1	3L	19811280	The gene Deformed epidermal autoregulatory factor-1 is referred to in FlyBase by the symbol Dmel\Deaf1 (CG8567, FBgn0013799). It is a protein_coding_gene from Drosophila melanogaster. Its sequence location is 3L:19811280..19822623. It has the cytological map location 76D1. There is experimental evidence that it has the molecular function</span>: transcription factor activity; sequence-specific DN…	2	1.09591e-13	3.04715e-11	6					altexon
FBgn0259240	Ten-a	X	12087914	The gene Tenascin accessory is referred to in FlyBase by the symbol Dmel\Ten-a (CG42338, FBgn0259240). It is a protein_coding_gene from Drosophila melanogaster. Its sequence location is X:12087914..12226216. It has the cytological map location 11A6-11A8. Its molecular function is unknown. There is experimental evidence that it is involved in the biological process</span>: periodic partitioning by…	3	3.14435e-13	7.85353e-97	5primeCassette	7	855			altexon
FBgn0029764	yu	X	5314896	The gene yu is referred to in FlyBase by the symbol Dmel\yu (CG3249, FBgn0029764). It is a protein_coding_gene from Drosophila melanogaster. Its sequence location is X:5307840..5314896. It has the cytological map location 4F9-4F10. Based on sequence similarity, it is predicted to have molecular function</span>: protein kinase A binding. There is experimental evidence that it is involved in the bi…	2	4.44231e-13	1	5primeCassette		412			altexon
FBgn0261565	Lmpt	3L	16858400	The gene Limpet is referred to in FlyBase by the symbol Dmel\Lmpt (CG42679, FBgn0261565). It is a protein_coding_gene from Drosophila melanogaster. Its sequence location is 3L:16858400..16915587. It has the cytological map location 73D5-73D6. It is reported to have molecular function</span>: transcription factor activity. The biological processes in which it is involved are not known. 44 alleles …	7	4.48655e-13	1.03159e-41	5primeCassette		91		63	altexon
FBgn0061200	Nup153	X	16493356	The gene Nucleoporin 153 is referred to in FlyBase by the symbol Dmel\Nup153 (CG4453, FBgn0061200). It is a protein_coding_gene from Drosophila melanogaster. Its sequence location is X:16493356..16504492. It has the cytological map location 14F2. An electronic pipeline based on InterPro domains suggests that it has the molecular function</span>: zinc ion binding. The biological processes in which…	3	1.03414e-12	0.259159					138	altexon
FBgn0027588	CG14476	X	21476294	This gene is referred to in FlyBase by the symbol Dmel\CG14476 (CG14476, FBgn0027588). It is a protein_coding_gene from Drosophila melanogaster. Its sequence location is X:21471627..21476294. It has the cytological map location 20A4. Based on sequence similarity, it is predicted to have molecular function</span>: alpha-glucosidase activity. An electronic pipeline based on InterPro domains suggest…	2	1.19267e-12	1	68					altexon
FBgn0261836	Msp-300	2L	5100877	The gene Muscle-specific protein 300 is referred to in FlyBase by the symbol Dmel\Msp-300 (CG42768, FBgn0261836). It is a protein_coding_gene from Drosophila melanogaster. Its sequence location is 2L:5100877..5205690. It has the cytological map location 25C6-25C10. There is experimental evidence that it has the molecular function</span>: actin binding. There is experimental evidence that it is in…	3	1.72479e-12	6.75036e-141	5primeCassette	3primeCassette	168	587		altexon
FBgn0010609	Acsl	2R	4553360	The gene Acyl-CoA synthetase long-chain is referred to in FlyBase by the symbol Dmel\Acsl (CG8732, FBgn0010609). It is a protein_coding_gene from Drosophila melanogaster. Its sequence location is 2R:4553360..4570296. It has the cytological map location 44E1-44E2. Based on sequence similarity, it is predicted to have molecular function</span>: long-chain-fatty-acid-CoA ligase activity. There is ex…	3	3.93651e-12	1.65575e-113	5primeCassette		139			altexon
FBgn0259700	CG42354	X	15998945	This gene is referred to in FlyBase by the symbol Dmel\CG42354 (CG42354, FBgn0259700). It is a protein_coding_gene from Drosophila melanogaster. Its sequence location is X:15987090..15998945. It has the cytological map location 14A9. Its molecular function is unknown. The biological processes in which it is involved are not known. 5 alleles are reported. No phenotypic data is available. It has 3 …	2	4.78768e-12	1	5primeCassette	13	109			altexon
FBgn0025683	CG3164	2L	130791	This gene is referred to in FlyBase by the symbol Dmel\CG3164 (CG3164, FBgn0025683). It is a protein_coding_gene from Drosophila melanogaster. Its sequence location is 2L:122624..130791. It has the cytological map location 21B2. Based on sequence similarity, it is predicted to have molecular function</span>: ATPase activity, coupled to transmembrane movement of substances; transporter activity. T…	2	5.01975e-12	1						altexon
FBgn0033872	CG6329	2R	9713880	This gene is referred to in FlyBase by the symbol Dmel\CG6329 (CG6329, FBgn0033872). It is a protein_coding_gene from Drosophila melanogaster. Its sequence location is 2R:9713880..9720419. It has the cytological map location 50C6. Its molecular function is unknown. The biological processes in which it is involved are not known. 5 alleles are reported. No phenotypic data is available. It has 4 ann…	2	6.61875e-12	2.31309e-157	5primeCassette	1539	107			altexon
FBgn0052451	SPoCk	3L	22742544	The gene Secretory Pathway Calcium atpase is referred to in FlyBase by the symbol Dmel\SPoCk (CG32451, FBgn0052451). It is a protein_coding_gene from Drosophila melanogaster. Its sequence location is 3L:22742544..22779797. It has the cytological map location 80A1-80A2. Based on sequence similarity, it is predicted to have molecular function</span>: manganese-transporting ATPase activity; calcium-…	3	8.07691e-12	1.41331e-117	5primeCassette		549			altexon
FBgn0050122	CG30122	2R	14526773	This gene is referred to in FlyBase by the symbol Dmel\CG30122 (CG30122, FBgn0050122). It is a protein_coding_gene from Drosophila melanogaster. Its sequence location is 2R:14519833..14526773. It has the cytological map location 55E3. Based on sequence similarity, it is predicted to have molecular function</span>: mRNA binding. It is reported to be involved in the biological process</span>: nucle…	2	9.07384e-12	1	5primeCassette	9	450			altexon
FBgn0025864	Crag	X	8486086	The gene Calmodulin-binding protein related to a Rab3 GDP/GTP exchange protein is referred to in FlyBase by the symbol Dmel\Crag (CG12737, FBgn0025864). It is a protein_coding_gene from Drosophila melanogaster. Its sequence location is X:8486086..8495264. It has the cytological map location 7F7-7F8. There is experimental evidence that it has the molecular function</span>: calmodulin binding. Ther…	3	1.16382e-11	2.01742e-10	5primeCassette		539			altexon
FBgn0261547	Exn	3L	16963517	The gene Ephexin is referred to in FlyBase by the symbol Dmel\Exn (CG42665, FBgn0261547). It is a protein_coding_gene from Drosophila melanogaster. Its sequence location is 3L:16963517..16987501. It has the cytological map location 73E1-73E2. An electronic pipeline based on InterPro domains suggests that it has the molecular function</span>: Rho guanyl-nucleotide exchange factor activity. There i…	4	1.70662e-11	2.30744e-42	16					altexon
FBgn0001215	Hrb98DE	3R	24425529	The gene Heterogeneous nuclear ribonucleoprotein at 98DE is referred to in FlyBase by the symbol Dmel\Hrb98DE (CG9983, FBgn0001215). It is a protein_coding_gene from Drosophila melanogaster. Its sequence location is 3R:24425529..24431499. It has the cytological map location 98D6. There is experimental evidence that it has the molecular function</span>: sequence-specific DNA binding. There is expe…	4	1.78051e-11	1.11308e-05						altexon
FBgn0024277	trio	3L	1034875	The gene trio is referred to in FlyBase by the symbol Dmel\trio (CG18214, FBgn0024277). It is a protein_coding_gene from Drosophila melanogaster. Its sequence location is 3L:995982..1034875. It has the cytological map location 61E1-61E2. There is experimental evidence that it has the molecular function</span>: Rho guanyl-nucleotide exchange factor activity. There is experimental evidence that it …	4	4.15528e-11	1.07833e-47	5primeCassette		559			altexon
FBgn0051122	CG31122	3R	14238589	This gene is referred to in FlyBase by the symbol Dmel\CG31122 (CG31122, FBgn0051122). It is a protein_coding_gene from Drosophila melanogaster. Its sequence location is 3R:14232353..14238589. It has the cytological map location 91A6. Its molecular function is unknown. The biological processes in which it is involved are not known. 4 alleles are reported. No phenotypic data is available. It has 2…	2	4.36027e-11	1.83476e-12						altexon
FBgn0037094	CG7611	3L	21516278	This gene is referred to in FlyBase by the symbol Dmel\CG7611 (CG7611, FBgn0037094). It is a protein_coding_gene from Drosophila melanogaster. Its sequence location is 3L:21516278..21521263. It has the cytological map location 78D5. Its molecular function is unknown. The biological processes in which it is involved are not known. 4 alleles are reported. No phenotypic data is available. It has 9 a…	6	4.39509e-11	1.58347e-12	10					altexon
FBgn0024832	AP-50	3R	18288153	The gene AP-50 is referred to in FlyBase by the symbol Dmel\AP-50 (CG7057, FBgn0024832). It is a protein_coding_gene from Drosophila melanogaster. Its sequence location is 3R:18288153..18290325. It has the cytological map location 94A15-94A16. An electronic pipeline based on InterPro domains suggests that it has the molecular function</span>: protein binding. There is experimental evidence that i…	2	5.79062e-11	0.00164536	9					altexon
FBgn0029997	CG2258	X	7996087	This gene is referred to in FlyBase by the symbol Dmel\CG2258 (CG2258, FBgn0029997). It is a protein_coding_gene from Drosophila melanogaster. Its sequence location is X:7990610..7996087. It has the cytological map location 7D6. There is experimental evidence that it has the molecular function</span>: protein binding. The biological processes in which it is involved are not known. 4 alleles are r…	3	6.1438e-11	1	5primeCassette		968		363
FBgn0032129	jp	2L	9566750	The gene junctophilin is referred to in FlyBase by the symbol Dmel\jp (CG4405, FBgn0032129). It is a protein_coding_gene from Drosophila melanogaster. Its sequence location is 2L:9547717..9566750. It has the cytological map location 30B10-30B12. Its molecular function is unknown. The biological processes in which it is involved are not known. 5 alleles are reported. No phenotypic data is availabl…	3	6.57064e-11	1.7728e-30	5primeCassette	496	318			altexon
FBgn0004656	fs(1)h	X	7955469	The gene female sterile (1) homeotic is referred to in FlyBase by the symbol Dmel\fs(1)h (CG2252, FBgn0004656). It is a protein_coding_gene from Drosophila melanogaster. Its sequence location is X:7933976..7955469. It has the cytological map location 7D3-7D5. It is reported to have molecular function</span>: protein kinase activity; DNA binding. There is experimental evidence that it is involved …	3	1.02227e-10	3.4735e-11	5primeCassette		173			altexon
FBgn0261788	Ank2	3L	7711439	The gene Ankyrin 2 is referred to in FlyBase by the symbol Dmel\Ank2 (CG42734, FBgn0261788). It is a protein_coding_gene from Drosophila melanogaster. Its sequence location is 3L:7648489..7711439. It has the cytological map location 66A10. Based on sequence similarity, it is predicted to have molecular function</span>: structural constituent of cytoskeleton; cytoskeletal protein binding. There is…	3	1.15518e-10	1.27135e-55	5primeCassette		513		2290	altexon
FBgn0027930	MP1	3R	133630	The gene Melanization Protease 1 is referred to in FlyBase by the symbol Dmel\MP1 (CG1102, FBgn0027930). It is a protein_coding_gene from Drosophila melanogaster. Its sequence location is 3R:133630..135559. It has the cytological map location 82A3. Based on sequence similarity, it is predicted to have molecular function</span>: serine-type endopeptidase activity. There is experimental evidence th…	2	1.34796e-10	1						altexon
FBgn0010100	Acon	2L	21168356	The gene Aconitase is referred to in FlyBase by the symbol Dmel\Acon (CG9244, FBgn0010100). It is a protein_coding_gene from Drosophila melanogaster. Its sequence location is 2L:21168356..21173017. It has the cytological map location 39A7. Based on sequence similarity, it is predicted to have molecular function</span>: aconitate hydratase activity. An electronic pipeline based on InterPro domains…	2	1.41517e-10	3.27359e-100	5primeCassette		449			altexon
FBgn0001098	Gdh	3R	19768824	The gene Glutamate dehydrogenase is referred to in FlyBase by the symbol Dmel\Gdh (CG5320, FBgn0001098). It is a protein_coding_gene from Drosophila melanogaster. Its sequence location is 3R:19761680..19768824. It has the cytological map location 95C13-95D1. There is experimental evidence that it has the molecular function</span>: glutamate dehydrogenase [NAD(P)+] activity; glutamate dehydrogenas…	2	1.90786e-10	3.68085e-53	4				39	altexon
FBgn0028325	l(1)G0334	X	4596305	The gene lethal (1) G0334 is referred to in FlyBase by the symbol Dmel\l(1)G0334 (CG7010, FBgn0028325). It is a protein_coding_gene from Drosophila melanogaster. Its sequence location is X:4596305..4599156. It has the cytological map location 4C14. Based on sequence similarity, it is predicted to have molecular function</span>: pyruvate dehydrogenase (acetyl-transferring) activity. Based on seque…	3	3.12752e-10	1.43713e-50	91					altexon
FBgn0034135	Syn2	2R	12439765	The gene Syntrophin-like 2 is referred to in FlyBase by the symbol Dmel\Syn2 (CG4905, FBgn0034135). It is a protein_coding_gene from Drosophila melanogaster. Its sequence location is 2R:12439765..12445988. It has the cytological map location 53C7. Based on sequence similarity, it is predicted to have molecular function</span>: structural constituent of muscle; cytoskeletal protein binding. The bi…	3	3.39383e-10	4.73467e-14	5primeCassette		362			altexon
FBgn0261243	Psa	3L	1502843	The gene Puromycin sensitive aminopeptidase is referred to in FlyBase by the symbol Dmel\Psa (CG1009, FBgn0261243). It is a protein_coding_gene from Drosophila melanogaster. Its sequence location is 3L:1502843..1523380. It has the cytological map location 62A3-62A4. It is reported to have molecular function</span>: aminopeptidase activity. An electronic pipeline based on InterPro domains suggests…	4	3.61232e-10	0.0103971					66	altexon
FBgn0259110	mmd	X	15866467	The gene mind-meld is referred to in FlyBase by the symbol Dmel\mmd (CG42252, FBgn0259110). It is a protein_coding_gene from Drosophila melanogaster. Its sequence location is X:15842400..15866467. It has the cytological map location 14A1-14A3. Based on sequence similarity, it is predicted to have molecular function</span>: metalloendopeptidase activity. An electronic pipeline based on InterPro do…	3	3.78123e-10	2.69288e-58					31	altexon
FBgn0024183	vig	2L	15070316	The gene vasa intronic gene is referred to in FlyBase by the symbol Dmel\vig (CG4170, FBgn0024183). It is a protein_coding_gene from Drosophila melanogaster. Its sequence location is 2L:15064198..15070316. It has the cytological map location 35C1. Based on sequence similarity, it is predicted to have molecular function</span>: mRNA binding. There is experimental evidence that it is involved in th…	2	5.03968e-10	5.49425e-38	25					altexon
FBgn0028343	l(1)G0222	X	17473262	The gene lethal (1) G0222 is referred to in FlyBase by the symbol Dmel\l(1)G0222 (CG8465, FBgn0028343). It is a protein_coding_gene from Drosophila melanogaster. Its sequence location is X:17465887..17473262. It has the cytological map location 16B5-16B6. Its molecular function is unknown. The biological processes in which it is involved are not known. 9 alleles are reported. No phenotypic data i…	2	5.31033e-10	0.615674	5primeCassette		125			altexon
FBgn0022063	Pcf11	2R	10758575	The gene Pcf11 is referred to in FlyBase by the symbol Dmel\Pcf11 (CG10228, FBgn0022063). It is a protein_coding_gene from Drosophila melanogaster. Its sequence location is 2R:10748661..10758575. It has the cytological map location 51C5-51C7. There is experimental evidence that it has the molecular function</span>: negative transcription elongation factor activity; RNA binding. Based on sequence …	4	5.993e-10	2.1286e-29		3primeCassette		966		altexon
FBgn0016650	Fsh	3R	13551248	The gene Fsh-Tsh-like receptor is referred to in FlyBase by the symbol Dmel\Fsh (CG7665, FBgn0016650). It is a protein_coding_gene from Drosophila melanogaster. Its sequence location is 3R:13551248..13558952. It has the cytological map location 90C2. Based on sequence similarity, it is predicted to have molecular function</span>: G-protein coupled receptor activity; protein-hormone receptor activ…	2	9.49745e-10	1						altexon
FBgn0025726	unc-13	4	925419	The gene unc-13 is referred to in FlyBase by the symbol Dmel\unc-13 (CG2999, FBgn0025726). It is a protein_coding_gene from Drosophila melanogaster. Its sequence location is 4:891551..925419. It has the cytological map location 102E5-102F1. Based on sequence similarity, it is predicted to have molecular function</span>: diacylglycerol binding. There is experimental evidence that it is involved in…	3	1.23725e-09	3.92782e-08		2			9	altexon
FBgn0032901	CG9339	2L	20918928	This gene is referred to in FlyBase by the symbol Dmel\CG9339 (CG9339, FBgn0032901). It is a protein_coding_gene from Drosophila melanogaster. Its sequence location is 2L:20871335..20918928. It has the cytological map location 38F3-38F5. An electronic pipeline based on InterPro domains suggests that it has the molecular function</span>: Rab GTPase activator activity. An electronic pipeline based …	3	1.39989e-09	4.57832e-09	5primeCassette		130			altexon
FBgn0014024	Rnp4F	X	5216759	The gene RNA-binding protein 4F is referred to in FlyBase by the symbol Dmel\Rnp4F (CG3312, FBgn0014024). It is a protein_coding_gene from Drosophila melanogaster. Its sequence location is X:5212961..5216759. It has the cytological map location 4F5. There is experimental evidence that it has the molecular function</span>: RNA binding. There is experimental evidence that it is involved in the biol…	3	1.5726e-09	3.78711e-30	16					altexon
FBgn0032036	CG13384	2L	8384430	This gene is referred to in FlyBase by the symbol Dmel\CG13384 (CG13384, FBgn0032036). It is a protein_coding_gene from Drosophila melanogaster. Its sequence location is 2L:8384430..8388804. It has the cytological map location 29B4-29C1. Based on sequence similarity, it is predicted to have molecular function</span>: amino acid transmembrane transporter activity. Based on sequence similarity, it …	6	1.66093e-09	6.09459e-17	5primeCassette		88			altexon
FBgn0050296	CG30296	2R	16905290	This gene is referred to in FlyBase by the symbol Dmel\CG30296 (CG30296, FBgn0050296). It is a protein_coding_gene from Drosophila melanogaster. Its sequence location is 2R:16905290..16912423. It has the cytological map location 57B9-57B12. Its molecular function is unknown. The biological processes in which it is involved are not known. 2 alleles are reported. No phenotypic data is available. It…	3	2.35979e-09	1					120
FBgn0000546	EcR	2R	2056681	The gene Ecdysone receptor is referred to in FlyBase by the symbol Dmel\EcR (CG1765, FBgn0000546). It is a protein_coding_gene from Drosophila melanogaster. Its sequence location is 2R:1977924..2056681. It has the cytological map location 42A9-42A12. There is experimental evidence that it has the molecular function</span>: ecdysteroid hormone receptor activity; protein binding; protein heterodime…	4	2.39309e-09	4.47923e-21		1858			966	altexon
FBgn0261556	CG42674	3L	20190804	This gene is referred to in FlyBase by the symbol Dmel\CG42674 (CG42674, FBgn0261556). It is a protein_coding_gene from Drosophila melanogaster. Its sequence location is 3L:20142714..20190804. It has the cytological map location 77A1. An electronic pipeline based on InterPro domains suggests that it has the molecular function</span>: Rho guanyl-nucleotide exchange factor activity. There is experi…	3	4.33151e-09	0.527233					543
FBgn0083919	Zasp52	2R	11704314	The gene Z band alternatively spliced PDZ-motif protein 52 is referred to in FlyBase by the symbol Dmel\Zasp52 (CG30084, FBgn0083919). It is a protein_coding_gene from Drosophila melanogaster. Its sequence location is 2R:11650070..11704314. It has the cytological map location 52C4-52C7. There is experimental evidence that it has the molecular function</span>: protein binding. The biological proce…	6	5.56034e-09	1.32962e-62	5primeCassette		217			altexon
FBgn0039600	CG1646	3R	24637826	This gene is referred to in FlyBase by the symbol Dmel\CG1646 (CG1646, FBgn0039600). It is a protein_coding_gene from Drosophila melanogaster. Its sequence location is 3R:24637826..24643076. It has the cytological map location 98E5. An electronic pipeline based on InterPro domains suggests that it has the molecular function</span>: heat shock protein binding. There is experimental evidence that i…	2	6.24351e-09	1.37231e-20						altexon
FBgn0011584	Trp1	2L	10009386	The gene Translocation protein 1 is referred to in FlyBase by the symbol Dmel\Trp1 (CG4758, FBgn0011584). It is a protein_coding_gene from Drosophila melanogaster. Its sequence location is 2L:10009386..10013171. It has the cytological map location 30F5. An electronic pipeline based on InterPro domains suggests that it has the molecular function</span>: protein transporter activity. Based on seque…	2	6.2998e-09	1	5primeCassette		151			altexon
FBgn0036927	CG7433	3L	19993786	This gene is referred to in FlyBase by the symbol Dmel\CG7433 (CG7433, FBgn0036927). It is a protein_coding_gene from Drosophila melanogaster. Its sequence location is 3L:19990814..19993786. It has the cytological map location 76D8-76E1. Based on sequence similarity, it is predicted to have molecular function</span>: 4-aminobutyrate transaminase activity. Based on sequence similarity, it is predi…	2	7.17818e-09	1.92551e-122	5primeCassette		48			altexon
FBgn0051145	CG31145	3R	19495378	This gene is referred to in FlyBase by the symbol Dmel\CG31145 (CG31145, FBgn0051145). It is a protein_coding_gene from Drosophila melanogaster. Its sequence location is 3R:19431473..19495378. It has the cytological map location 95A4-95A7. Its molecular function is unknown. The biological processes in which it is involved are not known. 12 alleles are reported. No phenotypic data is available. It…	2	8.29136e-09	6.34167e-42		1001			53	altexon
FBgn0037442	CG10277	3R	2208633	This gene is referred to in FlyBase by the symbol Dmel\CG10277 (CG10277, FBgn0037442). It is a protein_coding_gene from Drosophila melanogaster. Its sequence location is 3R:2208633..2214026. It has the cytological map location 83E5. An electronic pipeline based on InterPro domains suggests that it has the molecular function</span>: protein binding; zinc ion binding. The biological processes in wh…	2	8.81191e-09	1.76393e-66		511				altexon
FBgn0031144	CG1529	X	20902977	This gene is referred to in FlyBase by the symbol Dmel\CG1529 (CG1529, FBgn0031144). It is a protein_coding_gene from Drosophila melanogaster. Its sequence location is X:20899674..20902977. It has the cytological map location 19E7. An electronic pipeline based on InterPro domains suggests that it has the molecular function</span>: zinc ion binding. The biological processes in which it is involved…	2	9.20688e-09	1		5				altexon
FBgn0039358	CG5028	3R	21506540	This gene is referred to in FlyBase by the symbol Dmel\CG5028 (CG5028, FBgn0039358). It is a protein_coding_gene from Drosophila melanogaster. Its sequence location is 3R:21506540..21509363. It has the cytological map location 96E9. Based on sequence similarity, it is predicted to have molecular function</span>: isocitrate dehydrogenase (NAD+) activity. Based on sequence similarity, it is predict…	5	1.11946e-08	2.44121e-207	5primeCassette		206			altexon
FBgn0052521	CG32521	X	21152198	This gene is referred to in FlyBase by the symbol Dmel\CG32521 (CG32521, FBgn0052521). It is a protein_coding_gene from Drosophila melanogaster. Its sequence location is X:21076337..21152198. It has the cytological map location 19F2-19F3. Its molecular function is unknown. The biological processes in which it is involved are not known. 16 alleles are reported. The phenotype of these alleles is an…	2	1.21109e-08	3.74557e-13					68
FBgn0000414	Dab	3L	16706242	The gene Disabled is referred to in FlyBase by the symbol Dmel\Dab (CG9695, FBgn0000414). It is a protein_coding_gene from Drosophila melanogaster. Its sequence location is 3L:16706242..16717089. It has the cytological map location 73C1. There is experimental evidence that it has the molecular function</span>: SH2 domain binding; protein binding; SH3 domain binding. There is experimental evidence…	2	1.2398e-08	1.45724e-57	724	240				altexon
FBgn0259176	bun	2L	12546630	The gene bunched is referred to in FlyBase by the symbol Dmel\bun (CG42281, FBgn0259176). It is a protein_coding_gene from Drosophila melanogaster. Its sequence location is 2L:12456577..12546630. It has the cytological map location 33E5-33E9. Based on sequence similarity, it is predicted to have molecular function</span>: protein homodimerization activity. There is experimental evidence for 13 un…	6	1.26381e-08	1.73442e-47	5primeCassette		2825		335	altexon
FBgn0016976	stnA	X	22406483	The gene stoned A is referred to in FlyBase by the symbol Dmel\stnA (CG12500, FBgn0016976). It is a protein_coding_gene from Drosophila melanogaster. Its sequence location is X:22382558..22406483. It has the cytological map location 20F3. There is experimental evidence that it has the molecular function</span>: protein binding. There is experimental evidence that it is involved in the biological …	2	1.96363e-08	7.1771e-10						altexon
FBgn0013334	Sap47	3R	11760822	The gene Synapse-associated protein 47kD is referred to in FlyBase by the symbol Dmel\Sap47 (CG8884, FBgn0013334). It is a protein_coding_gene from Drosophila melanogaster. Its sequence location is 3R:11760822..11787847. It has the cytological map location 89A8. Its molecular function is unknown. It is reported to be involved in the biological process</span>: synaptic transmission. 20 alleles are…	3	2.25888e-08	6.20058e-17					318	altexon
FBgn0004370	Ptp10D	X	11516061	The gene Protein tyrosine phosphatase 10D is referred to in FlyBase by the symbol Dmel\Ptp10D (CG1817, FBgn0004370). It is a protein_coding_gene from Drosophila melanogaster. Its sequence location is X:11516061..11571371. It has the cytological map location 10D1-10D4. There is experimental evidence that it has the molecular function</span>: phosphoprotein phosphatase activity; protein tyrosine ph…	3	2.45728e-08	5.8033e-27		1085			1296	altexon
FBgn0085402	Ect4	3L	8067547	The gene Ect4 is referred to in FlyBase by the symbol Dmel\Ect4 (CG34373, FBgn0085402). It is a protein_coding_gene from Drosophila melanogaster. Its sequence location is 3L:8067547..8101938. It has the cytological map location 66B5-66B6. An electronic pipeline based on InterPro domains suggests that it has the molecular function</span>: binding; transmembrane receptor activity. An electronic pip…	5	2.5571e-08	2.02265e-29	5primeCassette		379		874	altexon
FBgn0038504	Sur-8	3R	13228233	The gene Sur-8 is referred to in FlyBase by the symbol Dmel\Sur-8 (CG5407, FBgn0038504). It is a protein_coding_gene from Drosophila melanogaster. Its sequence location is 3R:13220921..13228233. It has the cytological map location 90A5. Based on sequence similarity, it is predicted to have molecular function</span>: Ras GTPase binding. The biological processes in which it is involved are not know…	2	2.58634e-08	1	5primeCassette	1	368			altexon
FBgn0017418	ari-1	X	18031682	The gene ariadne is referred to in FlyBase by the symbol Dmel\ari-1 (CG5659, FBgn0017418). It is a protein_coding_gene from Drosophila melanogaster. Its sequence location is X:18026169..18031682. It has the cytological map location 16F7. It is reported to have molecular function</span>: ubiquitin-protein ligase activity. The biological processes in which it is involved are not known. 14 alleles a…	2	2.86262e-08	1	5primeCassette		74			altexon
FBgn0034282	Mapmodulin	2R	13759515	The gene Mapmodulin is referred to in FlyBase by the symbol Dmel\Mapmodulin (CG5784, FBgn0034282). It is a protein_coding_gene from Drosophila melanogaster. Its sequence location is 2R:13753827..13759515. It has the cytological map location 54F4. Based on sequence similarity, it is predicted to have molecular function</span>: phosphatase inhibitor activity; microtubule binding. Based on sequence …	3	3.25129e-08	9.50986e-95						altexon
FBgn0036663	CG9674	3L	16800828	This gene is referred to in FlyBase by the symbol Dmel\CG9674 (CG9674, FBgn0036663). It is a protein_coding_gene from Drosophila melanogaster. Its sequence location is 3L:16780915..16800828. It has the cytological map location 73C4-73D1. Based on sequence similarity, it is predicted to have molecular function</span>: glutamate synthase (NADPH) activity. An electronic pipeline based on InterPro do…	4	3.43745e-08	8.10289e-183	5primeCassette		89			altexon
FBgn0026418	Hsc70Cb	3L	14030124	The gene Hsc70Cb is referred to in FlyBase by the symbol Dmel\Hsc70Cb (CG6603, FBgn0026418). It is a protein_coding_gene from Drosophila melanogaster. Its sequence location is 3L:14030124..14036659. It has the cytological map location 70C15. Based on sequence similarity, it is predicted to have molecular function</span>: chaperone binding. Based on sequence similarity, it is predicted to be invol…	3	4.27644e-08	1						altexon
FBgn0035229	CG7852	3L	1537149	This gene is referred to in FlyBase by the symbol Dmel\CG7852 (CG7852, FBgn0035229). It is a protein_coding_gene from Drosophila melanogaster. Its sequence location is 3L:1537149..1544826. It has the cytological map location 62A3. Its molecular function is unknown. The biological processes in which it is involved are not known. 5 alleles are reported. No phenotypic data is available. It has 3 ann…	2	4.28867e-08	1		1				altexon
FBgn0000536	eas	X	16172360	The gene easily shocked is referred to in FlyBase by the symbol Dmel\eas (CG3525, FBgn0000536). It is a protein_coding_gene from Drosophila melanogaster. Its sequence location is X:16172360..16179654. It has the cytological map location 14B7. There is experimental evidence that it has the molecular function</span>: ethanolamine kinase activity. There is experimental evidence that it is involved i…	4	5.31947e-08	0.00387278	50				83	altexon
FBgn0261822	Bsg	2L	8083422	The gene Basigin is referred to in FlyBase by the symbol Dmel\Bsg (CG31605, FBgn0261822). It is a protein_coding_gene from Drosophila melanogaster. Its sequence location is 2L:8083422..8110561. It has the cytological map location 28E3-28E5. Its molecular function is unknown. There is experimental evidence that it is involved in the biological process</span>: inter-male aggressive behavior; sperma…	5	5.32613e-08	9.49195e-57	5primeCassette	3primeCassette	100	81	906	altexon
FBgn0039944	CG17162	XHet	75553	This gene is referred to in FlyBase by the symbol Dmel\CG17162 (CG17162, FBgn0039944). It is a protein_coding_gene from Drosophila melanogaster. Its sequence location is XHet:64549..75553. It has the cytological map location 20E. Its molecular function is unknown. The biological processes in which it is involved are not known. 2 alleles are reported. No phenotypic data is available. It has 5 anno…	2	6.63658e-08	1	5					altexon
FBgn0028479	CG4389	2L	9576768	This gene is referred to in FlyBase by the symbol Dmel\CG4389 (CG4389, FBgn0028479). It is a protein_coding_gene from Drosophila melanogaster. Its sequence location is 2L:9573563..9576768. It has the cytological map location 30B12. Based on sequence similarity, it is predicted to have molecular function</span>: long-chain-3-hydroxyacyl-CoA dehydrogenase activity; long-chain-enoyl-CoA hydratase ac…	2	7.51049e-08	2.0357e-15	14	12				altexon
FBgn0003887	betaTub56D	2R	15339122	The gene Î²-Tubulin at 56D is referred to in FlyBase by the symbol Dmel\Î²Tub56D (CG9277, FBgn0003887). It is a protein_coding_gene from Drosophila melanogaster. Its sequence location is 2R:15334824..15339122. It has the cytological map location 56D7-56D8. Based on sequence similarity, it is predicted to have molecular function</span>: structural constituent of cytoskeleton; GTP binding. Based on…	3	8.15855e-08	0.008312	49					altexon
FBgn0033739	Dyb	2R	8324840	The gene Dystrobrevin-like is referred to in FlyBase by the symbol Dmel\Dyb (CG8529, FBgn0033739). It is a protein_coding_gene from Drosophila melanogaster. Its sequence location is 2R:8324840..8340428. It has the cytological map location 49A6. Based on sequence similarity, it is predicted to have molecular function</span>: structural constituent of muscle; cytoskeletal protein binding. The biolo…	4	9.16952e-08	4.42348e-29	5primeCassette	11	556		168	altexon
FBgn0003475	spir	2L	20311219	The gene spire is referred to in FlyBase by the symbol Dmel\spir (CG10076, FBgn0003475). It is a protein_coding_gene from Drosophila melanogaster. Its sequence location is 2L:20311219..20348386. It has the cytological map location 38C5. There is experimental evidence that it has the molecular function</span>: protein binding; microtubule binding. There is experimental evidence that it is involved…	3	1.05985e-07	1		3primeCassette		1437	315	altexon
FBgn0052062	CG32062	3L	10509105	This gene is referred to in FlyBase by the symbol Dmel\CG32062 (CG32062, FBgn0052062). It is a protein_coding_gene from Drosophila melanogaster. Its sequence location is 3L:10509105..10584067. It has the cytological map location 67E4-67E5. Based on sequence similarity, it is predicted to have molecular function</span>: mRNA binding. There is experimental evidence that it is involved in the biolog…	4	1.24044e-07	8.17172e-05					72
FBgn0028879	CG15270	2L	15075645	This gene is referred to in FlyBase by the symbol Dmel\CG15270 (CG15270, FBgn0028879). It is a protein_coding_gene from Drosophila melanogaster. Its sequence location is 2L:15075645..15096915. It has the cytological map location 35C1-35C2. Its molecular function is unknown. The biological processes in which it is involved are not known. 3 alleles are reported. No phenotypic data is available. It …	2	1.279e-07	2.21669e-15					99
FBgn0039997	CG17665	2R	130444	This gene is referred to in FlyBase by the symbol Dmel\CG17665 (CG17665, FBgn0039997). It is a protein_coding_gene from Drosophila melanogaster. Its sequence location is 2R:123268..130444. Its molecular function is unknown. The biological processes in which it is involved are not known. One allele is reported. No phenotypic data is available. It has 2 annotated transcripts and 2 annotated polypep…	2	1.5136e-07	0.279882		16			611	altexon
FBgn0034155	unc-104	2R	12660002	The gene unc-104 is referred to in FlyBase by the symbol Dmel\unc-104 (CG8566, FBgn0034155). It is a protein_coding_gene from Drosophila melanogaster. Its sequence location is 2R:12639001..12660002. It has the cytological map location 53D6-53D7. Based on sequence similarity, it is predicted to have molecular function</span>: microtubule motor activity. There is experimental evidence that it is in…	3	1.96008e-07	0.00643457					42
FBgn0051716	CG31716	2L	10396711	This gene is referred to in FlyBase by the symbol Dmel\CG31716 (CG31716, FBgn0051716). It is a protein_coding_gene from Drosophila melanogaster. Its sequence location is 2L:10396711..10402885. It has the cytological map location 31E1. Based on sequence similarity, it is predicted to have molecular function</span>: mRNA binding; transcription repressor activity. Based on sequence similarity, it is…	2	2.00878e-07	3.34944e-54	5primeCassette		272			altexon
FBgn0030400	CG11138	X	12477215	This gene is referred to in FlyBase by the symbol Dmel\CG11138 (CG11138, FBgn0030400). It is a protein_coding_gene from Drosophila melanogaster. Its sequence location is X:12465243..12477215. It has the cytological map location 11B1-11B2. Its molecular function is unknown. The biological processes in which it is involved are not known. 12 alleles are reported. No phenotypic data is available. It …	2	2.52673e-07	0.000173722	5primeCassette		1611			altexon
FBgn0003137	Ppn	3R	24366053	The gene Papilin is referred to in FlyBase by the symbol Dmel\Ppn (CG33103, FBgn0003137). It is a protein_coding_gene from Drosophila melanogaster. Its sequence location is 3R:24346387..24366053. It has the cytological map location 98D3-98D4. There is experimental evidence that it has the molecular function</span>: extracellular matrix structural constituent. There is experimental evidence that i…	2	2.66912e-07	2.18677e-60					171
FBgn0261397	didum	2R	3387660	The gene dilute class unconventional myosin is referred to in FlyBase by the symbol Dmel\didum (CG2146, FBgn0261397). It is a protein_coding_gene from Drosophila melanogaster. Its sequence location is 2R:3387660..3396130. It has the cytological map location 43C7-43D1. There is experimental evidence that it has the molecular function</span>: actin binding; actin-dependent ATPase activity; ATP bind…	2	2.673e-07	2.32141e-38					24
FBgn0260003	Dys	3R	15286810	The gene Dystrophin is referred to in FlyBase by the symbol Dmel\Dys (CG34157, FBgn0260003). It is a protein_coding_gene from Drosophila melanogaster. Its sequence location is 3R:15286810..15421117. It has the cytological map location 92A5-92A10. There is experimental evidence that it has the molecular function</span>: WW domain binding. There is experimental evidence that it is involved in the b…	5	2.92564e-07	0.0329911					303
FBgn0003969	vap	X	15899877	The gene vacuolar peduncle is referred to in FlyBase by the symbol Dmel\vap (CG9209, FBgn0003969). It is a protein_coding_gene from Drosophila melanogaster. Its sequence location is X:15894167..15899877. It has the cytological map location 14A5-14A6. Based on sequence similarity, it is predicted to have molecular function</span>: Ras GTPase activator activity. There is experimental evidence that …	3	3.6236e-07	0.0397701						altexon
FBgn0039905	CG2052	4	414016	This gene is referred to in FlyBase by the symbol Dmel\CG2052 (CG2052, FBgn0039905). It is a protein_coding_gene from Drosophila melanogaster. Its sequence location is 4:396260..414016. It has the cytological map location 102B6-102B7. An electronic pipeline based on InterPro domains suggests that it has the molecular function</span>: zinc ion binding; nucleic acid binding. The biological processe…	2	4.93837e-07	9.00216e-13						altexon
FBgn0250753	exba	3R	1426891	The gene extra bases is referred to in FlyBase by the symbol Dmel\exba (CG2922, FBgn0250753). It is a protein_coding_gene from Drosophila melanogaster. Its sequence location is 3R:1421086..1426891. It has the cytological map location 83B4. There is experimental evidence that it has the molecular function</span>: protein binding; ribosome binding; translation initiation factor binding. There is ex…	5	5.45929e-07	1.57435e-98	5primeCassette		459			altexon
FBgn0032170	CG4658	2L	9957287	This gene is referred to in FlyBase by the symbol Dmel\CG4658 (CG4658, FBgn0032170). It is a protein_coding_gene from Drosophila melanogaster. Its sequence location is 2L:9957287..9960170. It has the cytological map location 30F2. Its molecular function is unknown. The biological processes in which it is involved are not known. 3 alleles are reported. No phenotypic data is available. It has 3 ann…	2	6.93154e-07	2.1586e-16						altexon
FBgn0004838	Hrb27C	2L	6920693	The gene Heterogeneous nuclear ribonucleoprotein at 27C is referred to in FlyBase by the symbol Dmel\Hrb27C (CG10377, FBgn0004838). It is a protein_coding_gene from Drosophila melanogaster. Its sequence location is 2L:6920693..6926046. It has the cytological map location 27C4. There is experimental evidence that it has the molecular function</span>: protein binding; mRNA 3'-UTR binding; single-st…	3	8.37893e-07	7.33271e-21	5primeCassette		169			altexon
FBgn0033246	CG11198	2R	3874729	This gene is referred to in FlyBase by the symbol Dmel\CG11198 (CG11198, FBgn0033246). It is a protein_coding_gene from Drosophila melanogaster. Its sequence location is 2R:3861620..3874729. It has the cytological map location 44A1-44A2. Based on sequence similarity, it is predicted to have molecular function</span>: acetyl-CoA carboxylase activity. An electronic pipeline based on InterPro domain…	2	8.5756e-07	1					177
FBgn0005634	zip	2R	20899488	The gene zipper is referred to in FlyBase by the symbol Dmel\zip (CG15792, FBgn0005634). It is a protein_coding_gene from Drosophila melanogaster. Its sequence location is 2R:20878471..20899488. It has the cytological map location 60E12. There is experimental evidence that it has the molecular function</span>: myosin light chain binding. There is experimental evidence for 16 unique biological pro…	3	9.57407e-07	8.99224e-06						altexon
FBgn0013263	Trl	3L	14754149	The gene Trithorax-like is referred to in FlyBase by the symbol Dmel\Trl (CG33261, FBgn0013263). It is a protein_coding_gene from Drosophila melanogaster. Its sequence location is 3L:14741029..14754149. It has the cytological map location 70F4. There is experimental evidence that it has the molecular function</span>: protein binding; specific RNA polymerase II transcription factor activity; DNA b…	4	9.94044e-07	5.29733e-43		3primeCassette		1809		altexon
FBgn0036202	CG6024	3L	11759282	This gene is referred to in FlyBase by the symbol Dmel\CG6024 (CG6024, FBgn0036202). It is a protein_coding_gene from Drosophila melanogaster. Its sequence location is 3L:11726689..11759282. It has the cytological map location 68D3-68D4. Its molecular function is unknown. The biological processes in which it is involved are not known. 9 alleles are reported. No phenotypic data is available. It ha…	3	1.07396e-06	2.41478e-38		1947				altexon
FBgn0020647	KrT95D	3R	19857532	The gene Krueppel target at 95D is referred to in FlyBase by the symbol Dmel\KrT95D (CG5405, FBgn0020647). It is a protein_coding_gene from Drosophila melanogaster. Its sequence location is 3R:19824162..19857532. It has the cytological map location 95D5-95D8. Its molecular function is unknown. Based on sequence similarity, it is predicted to be involved in the biological process</span>: protein t…	4	1.08528e-06	1.52758e-52	5primeCassette		251			altexon
FBgn0000338	cnc	3R	19047683	The gene cap-n-collar is referred to in FlyBase by the symbol Dmel\cnc (CG17894, FBgn0000338). It is a protein_coding_gene from Drosophila melanogaster. Its sequence location is 3R:19011300..19047683. It has the cytological map location 94E4-94E7. There is experimental evidence that it has the molecular function</span>: DNA binding. There is experimental evidence that it is involved in the biolog…	4	1.17743e-06	8.589e-11	5primeCassette		116			altexon
FBgn0028577	pUf68	3L	1502598	The gene poly U binding factor 68kD is referred to in FlyBase by the symbol Dmel\pUf68 (CG12085, FBgn0028577). It is a protein_coding_gene from Drosophila melanogaster. Its sequence location is 3L:1496853..1502598. It has the cytological map location 62A2-62A3. There is experimental evidence that it has the molecular function</span>: protein binding. There is experimental evidence that it is invo…	4	1.28687e-06	8.11291e-17						altexon
FBgn0005536	Mbs	3L	16045068	The gene Myosin binding subunit is referred to in FlyBase by the symbol Dmel\Mbs (CG32156, FBgn0005536). It is a protein_coding_gene from Drosophila melanogaster. Its sequence location is 3L:16045068..16075126. It has the cytological map location 72D1. There is experimental evidence that it has the molecular function</span>: myosin phosphatase activity. There is experimental evidence that it is i…	7	1.39169e-06	2.41725e-13	5primeCassette		183		419	altexon
FBgn0033108	CG15236	2R	2715863	This gene is referred to in FlyBase by the symbol Dmel\CG15236 (CG15236, FBgn0033108). It is a protein_coding_gene from Drosophila melanogaster. Its sequence location is 2R:2715863..2725865. It has the cytological map location 42D4-42D6. Its molecular function is unknown. The biological processes in which it is involved are not known. 10 alleles are reported. No phenotypic data is available. It h…	2	1.93582e-06	1	50					altexon
FBgn0001235	hth	3R	6464386	The gene homothorax is referred to in FlyBase by the symbol Dmel\hth (CG17117, FBgn0001235). It is a protein_coding_gene from Drosophila melanogaster. Its sequence location is 3R:6335569..6464386. It has the cytological map location 86C1-86C3. There is experimental evidence that it has the molecular function</span>: DNA binding. There is experimental evidence that it is involved in the biological…	4	2.27661e-06	5.29449e-09					48
FBgn0038224	CG3321	3R	10152746	This gene is referred to in FlyBase by the symbol Dmel\CG3321 (CG3321, FBgn0038224). It is a protein_coding_gene from Drosophila melanogaster. Its sequence location is 3R:10152746..10153473. It has the cytological map location 88B4. Based on sequence similarity, it is predicted to have molecular function</span>: hydrogen-exporting ATPase activity, phosphorylative mechanism. Based on sequence simi…	2	2.4322e-06	1						altexon
FBgn0029761	SK	X	5234271	The gene small conductance calcium-activated potassium channel is referred to in FlyBase by the symbol Dmel\SK (CG10706, FBgn0029761). It is a protein_coding_gene from Drosophila melanogaster. Its sequence location is X:5234271..5295156. It has the cytological map location 4F5-4F9. Based on sequence similarity, it is predicted to have molecular function</span>: small conductance calcium-activated…	4	2.74621e-06	7.12932e-35	5primeCassette		84			altexon
FBgn0039406	RpL34a	3R	21884989	The gene Ribosomal protein L34a is referred to in FlyBase by the symbol Dmel\RpL34a (CG6090, FBgn0039406). It is a protein_coding_gene from Drosophila melanogaster. Its sequence location is 3R:21884142..21884989. It has the cytological map location 96F10. There is experimental evidence that it has the molecular function</span>: protein binding. An electronic pipeline based on InterPro domains sug…	2	3.42852e-06	6.45688e-06						altexon
FBgn0250785	vari	2L	20797040	The gene varicose is referred to in FlyBase by the symbol Dmel\vari (CG9326, FBgn0250785). It is a protein_coding_gene from Drosophila melanogaster. Its sequence location is 2L:20788659..20797040. It has the cytological map location 39D3-40B1. Based on sequence similarity, it is predicted to have molecular function</span>: guanylate kinase activity. There is experimental evidence that it is invol…	3	3.65969e-06	1						altexon
FBgn0000581	E(Pc)	2R	7339722	The gene Enhancer of Polycomb is referred to in FlyBase by the symbol Dmel\E(Pc) (CG7776, FBgn0000581). It is a protein_coding_gene from Drosophila melanogaster. Its sequence location is 2R:7339722..7351535. It has the cytological map location 47F13-47F14. Its molecular function is unknown. There is experimental evidence that it is involved in the biological process</span>: chromatin organization…	2	3.80202e-06	4.97788e-08	5primeCassette		167			altexon
FBgn0036896	wnd	3L	19628882	The gene wallenda is referred to in FlyBase by the symbol Dmel\wnd (CG8789, FBgn0036896). It is a protein_coding_gene from Drosophila melanogaster. Its sequence location is 3L:19617506..19628882. It has the cytological map location 76B9. Based on sequence similarity, it is predicted to have molecular function</span>: protein serine/threonine kinase activity. It is reported to be involved in the b…	3	3.82258e-06	1	18					altexon
FBgn0003559	su(f)	XHet	69195	The gene suppressor of forked is referred to in FlyBase by the symbol Dmel\su(f) (CG17170, FBgn0003559). It is a protein_coding_gene from Drosophila melanogaster. Its sequence location is XHet:69195..80010. It has the cytological map location 20E. Its molecular function is unknown. Based on sequence similarity, it is predicted to be involved in the biological process</span>: mRNA cleavage. 50 all…	2	5.43868e-06	3.48784e-11	5primeCassette		111			altexon
FBgn0039908	Asator	4	504406	The gene Asator is referred to in FlyBase by the symbol Dmel\Asator (CG11533, FBgn0039908). It is a protein_coding_gene from Drosophila melanogaster. Its sequence location is 4:491912..504406. It has the cytological map location 102C1. It is reported to have molecular function</span>: protein serine/threonine kinase activity. It is reported to be involved in the biological process</span>: protein…	3	5.61963e-06	1.74177e-09		3primeCassette		1235		altexon
FBgn0261549	rdgA	X	8801101	The gene retinal degeneration A is referred to in FlyBase by the symbol Dmel\rdgA (CG42667, FBgn0261549). It is a protein_coding_gene from Drosophila melanogaster. Its sequence location is X:8801101..8919841. It has the cytological map location 8B8-8C3. Based on sequence similarity, it is predicted to have molecular function</span>: diacylglycerol binding; diacylglycerol kinase activity. There is…	2	6.46804e-06	1	5primeCassette	3primeCassette	577	643	1436	altexon
FBgn0036623	CG4729	3L	16379057	This gene is referred to in FlyBase by the symbol Dmel\CG4729 (CG4729, FBgn0036623). It is a protein_coding_gene from Drosophila melanogaster. Its sequence location is 3L:16374871..16379057. It has the cytological map location 72E4. Based on sequence similarity, it is predicted to have molecular function</span>: 1-acylglycerol-3-phosphate O-acyltransferase activity. An electronic pipeline based o…	3	6.5573e-06	1.59365e-49	5primeCassette		138			altexon
FBgn0020306	dom	2R	17210949	The gene domino is referred to in FlyBase by the symbol Dmel\dom (CG9696, FBgn0020306). It is a protein_coding_gene from Drosophila melanogaster. Its sequence location is 2R:17210949..17229352. It has the cytological map location 57D11-57D12. There is experimental evidence that it has the molecular function</span>: protein binding. There is experimental evidence that it is involved in the biologi…	3	6.62147e-06	2.81204e-05						altexon
FBgn0026401	Nipped-B	2R	616515	The gene Nipped-B is referred to in FlyBase by the symbol Dmel\Nipped-B (CG17704, FBgn0026401). It is a protein_coding_gene from Drosophila melanogaster. Its sequence location is 2R:579177..616515. It has the cytological map location 41B3-41C1. There is experimental evidence that it has the molecular function</span>: transcription activator activity. There is experimental evidence that it is invo…	3	7.43916e-06	5.45087e-74	1					altexon
FBgn0027616	YT521-B	3L	3374166	The gene YT521-B is referred to in FlyBase by the symbol Dmel\YT521-B (CG12076, FBgn0027616). It is a protein_coding_gene from Drosophila melanogaster. Its sequence location is 3L:3371101..3374166. It has the cytological map location 63D2. Its molecular function is unknown. The biological processes in which it is involved are not known. 4 alleles are reported. The phenotype of these alleles is an…	2	7.76996e-06	1						altexon
FBgn0020503	CLIP-190	2L	17384739	The gene Cytoplasmic linker protein 190 is referred to in FlyBase by the symbol Dmel\CLIP-190 (CG5020, FBgn0020503). It is a protein_coding_gene from Drosophila melanogaster. Its sequence location is 2L:17384739..17409698. It has the cytological map location 36C7. There is experimental evidence that it has the molecular function</span>: actin binding; protein binding; microtubule binding. There i…	4	7.88179e-06	3.40222e-55		3primeCassette		340	580	altexon
FBgn0030608	Lsd-2	X	14970236	The gene Lipid storage droplet-2 is referred to in FlyBase by the symbol Dmel\Lsd-2 (CG9057, FBgn0030608). It is a protein_coding_gene from Drosophila melanogaster. Its sequence location is X:14965489..14970236. It has the cytological map location 13A8-13A9. There is experimental evidence that it has the molecular function</span>: protein binding. There is experimental evidence that it is involve…	3	8.23126e-06	1					51
FBgn0035989	CG3967	3L	9419777	This gene is referred to in FlyBase by the symbol Dmel\CG3967 (CG3967, FBgn0035989). It is a protein_coding_gene from Drosophila melanogaster. Its sequence location is 3L:9406696..9419777. It has the cytological map location 67B5. Its molecular function is unknown. The biological processes in which it is involved are not known. 11 alleles are reported. No phenotypic data is available. It has 5 an…	3	8.97479e-06	1.66902e-18	5primeCassette		455			altexon
FBgn0000319	Chc	X	15729507	The gene Clathrin heavy chain is referred to in FlyBase by the symbol Dmel\Chc (CG9012, FBgn0000319). It is a protein_coding_gene from Drosophila melanogaster. Its sequence location is X:15722019..15729507. It has the cytological map location 13F5-13F7. An electronic pipeline based on InterPro domains suggests that it has the molecular function</span>: structural molecule activity; protein bindin…	2	1.17979e-05	1						altexon
FBgn0035500	ens	3L	4134550	The gene ensconsin is referred to in FlyBase by the symbol Dmel\ens (CG14998, FBgn0035500). It is a protein_coding_gene from Drosophila melanogaster. Its sequence location is 3L:4123548..4134550. It has the cytological map location 64A7. Its molecular function is unknown. There is experimental evidence that it is involved in the biological process</span>: regulation of microtubule-based movement.…	5	1.26364e-05	3.84338e-49					54
FBgn0030817	CG4991	X	16995311	This gene is referred to in FlyBase by the symbol Dmel\CG4991 (CG4991, FBgn0030817). It is a protein_coding_gene from Drosophila melanogaster. Its sequence location is X:16995311..16998597. It has the cytological map location 15E3. Based on sequence similarity, it is predicted to have molecular function</span>: amino acid transmembrane transporter activity. Based on sequence similarity, it is pre…	2	1.27681e-05	0.0737368	5primeCassette		108			altexon
FBgn0034091	mrj	2R	12109301	The gene mrj is referred to in FlyBase by the symbol Dmel\mrj (CG8448, FBgn0034091). It is a protein_coding_gene from Drosophila melanogaster. Its sequence location is 2R:12090827..12109301. It has the cytological map location 52F8-52F11. An electronic pipeline based on InterPro domains suggests that it has the molecular function</span>: heat shock protein binding. The biological processes in whi…	3	1.33463e-05	0.00382443	5primeCassette		127			altexon
FBgn0027608	CG2082	3R	1606798	This gene is referred to in FlyBase by the symbol Dmel\CG2082 (CG2082, FBgn0027608). It is a protein_coding_gene from Drosophila melanogaster. Its sequence location is 3R:1584992..1606798. It has the cytological map location 83C3. Its molecular function is unknown. The biological processes in which it is involved are not known. 8 alleles are reported. No phenotypic data is available. It has 12 an…	4	1.34792e-05	8.42018e-131	5primeCassette	300	213		266	altexon
FBgn0034420	CG10737	2R	15051652	This gene is referred to in FlyBase by the symbol Dmel\CG10737 (CG10737, FBgn0034420). It is a protein_coding_gene from Drosophila melanogaster. Its sequence location is 2R:15051652..15065728. It has the cytological map location 56C1. Based on sequence similarity, it is predicted to have molecular function</span>: diacylglycerol binding. An electronic pipeline based on InterPro domains suggests t…	6	1.76741e-05	1	5primeCassette	3primeCassette	29	405	207	altexon
FBgn0039916	CG9935	4	667182	This gene is referred to in FlyBase by the symbol Dmel\CG9935 (CG9935, FBgn0039916). It is a protein_coding_gene from Drosophila melanogaster. Its sequence location is 4:656751..667182. It has the cytological map location 102D1. Based on sequence similarity, it is predicted to have molecular function</span>: kainate selective glutamate receptor activity. An electronic pipeline based on InterPro d…	2	1.81115e-05	0.681873						altexon
FBgn0039958	CG12567	2LHet	32995	This gene is referred to in FlyBase by the symbol Dmel\CG12567 (CG12567, FBgn0039958). It is a protein_coding_gene from Drosophila melanogaster. Its sequence location is 2LHet:19633..32995. Based on sequence similarity, it is predicted to have molecular function</span>: thiamin diphosphokinase activity. The biological processes in which it is involved are not known. One allele is reported. No phe…	3	2.36406e-05	1	5primeCassette		355			altexon
FBgn0014391	sun	X	15743273	The gene stunted is referred to in FlyBase by the symbol Dmel\sun (CG9032, FBgn0014391). It is a protein_coding_gene from Drosophila melanogaster. Its sequence location is X:15741454..15743273. It has the cytological map location 13F12. Based on sequence similarity, it is predicted to have molecular function</span>: hydrogen-exporting ATPase activity, phosphorylative mechanism. There is experimen…	2	2.44029e-05	4.2694e-25					50
FBgn0022085	ssp4	2R	13422942	The gene short spindle 4 is referred to in FlyBase by the symbol Dmel\ssp4 (CG33130, FBgn0022085). It is a protein_coding_gene from Drosophila melanogaster. Its sequence location is 2R:13406523..13422942. It has the cytological map location 54C1-54C3. Based on sequence similarity, it is predicted to have molecular function</span>: microtubule binding. There is experimental evidence that it is inv…	4	2.51787e-05	7.11324e-06	5primeCassette		612			altexon
FBgn0036685	CG6664	3L	17009280	This gene is referred to in FlyBase by the symbol Dmel\CG6664 (CG6664, FBgn0036685). It is a protein_coding_gene from Drosophila melanogaster. Its sequence location is 3L:17005986..17009280. It has the cytological map location 73E4. Its molecular function is unknown. The biological processes in which it is involved are not known. 3 alleles are reported. No phenotypic data is available. It has 4 a…	2	3.18903e-05	0.0022992	150					altexon
FBgn0026199	myoglianin	4	716675	The gene myoglianin is referred to in FlyBase by the symbol Dmel\myoglianin (CG1838, FBgn0026199). It is a protein_coding_gene from Drosophila melanogaster. Its sequence location is 4:711890..716675. It has the cytological map location 102D4. Based on sequence similarity, it is predicted to have molecular function</span>: growth factor activity. An electronic pipeline based on InterPro domains su…	4	3.78043e-05	1.4113e-05		3				altexon
FBgn0000382	csw	X	1988269	The gene corkscrew is referred to in FlyBase by the symbol Dmel\csw (CG3954, FBgn0000382). It is a protein_coding_gene from Drosophila melanogaster. Its sequence location is X:1988269..2007698. It has the cytological map location 2D1-2D2. There is experimental evidence that it has the molecular function</span>: protein tyrosine phosphatase activity; protein binding. There is experimental evidence…	3	3.80756e-05	4.03138e-60	5primeCassette	1	629			altexon
FBgn0028703	Nhe3	2L	6684357	The gene Na<sup>+</sup>/H<sup>+</sup> hydrogen exchanger 3 is referred to in FlyBase by the symbol Dmel\Nhe3 (CG11328, FBgn0028703). It is a protein_coding_gene from Drosophila melanogaster. Its sequence location is 2L:6677835..6684357. It has the cytological map location 26F7. It is reported to have molecular function</span>: sodium:hydrogen antiporter activity. An electronic pipeline based on I…	3	4.12665e-05	2.0604e-27						altexon
FBgn0000307	chif	2L	16352600	The gene chiffon is referred to in FlyBase by the symbol Dmel\chif (CG5813, FBgn0000307). It is a protein_coding_gene from Drosophila melanogaster. Its sequence location is 2L:16342428..16352600. It has the cytological map location 35F1-35F12. An electronic pipeline based on InterPro domains suggests that it has the molecular function</span>: zinc ion binding; DNA binding. There is experimental e…	2	4.49416e-05	5.0995e-17		3primeCassette		877		altexon
FBgn0086899	tlk	X	3614054	The gene Tousled-like kinase is referred to in FlyBase by the symbol Dmel\tlk (CG34412, FBgn0086899). It is a protein_coding_gene from Drosophila melanogaster. Its sequence location is X:3614054..3682010. It has the cytological map location 3F1-3E7. There is experimental evidence that it has the molecular function</span>: protein binding; protein kinase activity. There is experimental evidence th…	6	4.56067e-05	1.00602e-35	5primeCassette	1008	67			altexon
FBgn0030724	Nipsnap	X	15967599	The gene Nipsnap is referred to in FlyBase by the symbol Dmel\Nipsnap (CG9212, FBgn0030724). It is a protein_coding_gene from Drosophila melanogaster. Its sequence location is X:15964395..15967599. It has the cytological map location 14A7-14A8. Its molecular function is unknown. The biological processes in which it is involved are not known. 3 alleles are reported. No phenotypic data is available…	2	5.058e-05	0.0629367	38					altexon
FBgn0259923	2014-09-05	X	16589206	The gene Septin 4 is referred to in FlyBase by the symbol Dmel\Sep4 (CG9699, FBgn0259923). It is a protein_coding_gene from Drosophila melanogaster. Its sequence location is X:16578244..16589206. It has the cytological map location 15A1-15A2. It is reported to have molecular function</span>: GTPase activity. Based on sequence similarity, it is predicted to be involved in the biological process</s…	2	5.63323e-05	1	5primeCassette		217			altexon
FBgn0003256	rl	2RHet	198176	The gene rolled is referred to in FlyBase by the symbol Dmel\rl (CG12559, FBgn0003256). It is a protein_coding_gene from Drosophila melanogaster. Its sequence location is 2RHet:198176..247809. It has the cytological map location h41. There is experimental evidence that it has the molecular function</span>: protein binding; JUN kinase activity. There is experimental evidence that it is involved in…	4	5.98765e-05	1	4	6				altexon
FBgn0259221	CG42321	2R	9326550	This gene is referred to in FlyBase by the symbol Dmel\CG42321 (CG42321, FBgn0259221). It is a protein_coding_gene from Drosophila melanogaster. Its sequence location is 2R:9302483..9326550. It has the cytological map location 50A8. Based on sequence similarity, it is predicted to have molecular function</span>: ATPase activity, coupled to transmembrane movement of ions, phosphorylative mechanism…	6	6.11408e-05	5.68109e-22	5primeCassette		439		595
FBgn0003464	sol	X	21221357	The gene small optic lobes is referred to in FlyBase by the symbol Dmel\sol (CG1391, FBgn0003464). It is a protein_coding_gene from Drosophila melanogaster. Its sequence location is X:21221357..21228939. It has the cytological map location 19F5. Based on sequence similarity, it is predicted to have molecular function</span>: calcium-dependent cysteine-type endopeptidase activity. There is experim…	3	6.5707e-05	2.69911e-21	5primeCassette		521			altexon
FBgn0051973	Cda5	2L	59242	The gene Chitin deacetylase-like 5 is referred to in FlyBase by the symbol Dmel\Cda5 (CG31973, FBgn0051973). It is a protein_coding_gene from Drosophila melanogaster. Its sequence location is 2L:25402..59242. It has the cytological map location 21B1. An electronic pipeline based on InterPro domains suggests that it has the molecular function</span>: hydrolase activity, acting on carbon-nitrogen (…	4	6.75532e-05	1					229
FBgn0031187	CG14619	X	21857639	This gene is referred to in FlyBase by the symbol Dmel\CG14619 (CG14619, FBgn0031187). It is a protein_coding_gene from Drosophila melanogaster. Its sequence location is X:21857639..21870327. It has the cytological map location 20C1. It is reported to have molecular function</span>: ubiquitin-specific protease activity. It is reported to be involved in the biological process</span>: protein deubi…	4	7.56533e-05	0.0146078	5primeCassette		1656			altexon
FBgn0028671	Vha100-1	3R	24956772	The gene Vha100-1 is referred to in FlyBase by the symbol Dmel\Vha100-1 (CG1709, FBgn0028671). It is a protein_coding_gene from Drosophila melanogaster. Its sequence location is 3R:24956772..24963702. It has the cytological map location 98F12. There is experimental evidence that it has the molecular function</span>: calmodulin binding. An electronic pipeline based on InterPro domains suggests tha…	5	9.87209e-05	6.18026e-79					140
FBgn0035936	Tsp66E	3L	8905599	The gene Tetraspanin 66E is referred to in FlyBase by the symbol Dmel\Tsp66E (CG4999, FBgn0035936). It is a protein_coding_gene from Drosophila melanogaster. Its sequence location is 3L:8905599..8925165. It has the cytological map location 66E3-66E4. Its molecular function is unknown. The biological processes in which it is involved are not known. 13 alleles are reported. No phenotypic data is av…	3	9.91702e-05	1.46507e-14	45					altexon
FBgn0005427	ewg	X	173667	The gene erect wing is referred to in FlyBase by the symbol Dmel\ewg (CG3114, FBgn0005427). It is a protein_coding_gene from Drosophila melanogaster. Its sequence location is X:162554..173667. It has the cytological map location 1A1. Based on sequence similarity, it is predicted to have molecular function</span>: specific RNA polymerase II transcription factor activity; DNA binding. There is expe…	4	0.000141451	1					462
FBgn0039668	Trc8	3R	25329519	The gene Trc8 is referred to in FlyBase by the symbol Dmel\Trc8 (CG2304, FBgn0039668). It is a protein_coding_gene from Drosophila melanogaster. Its sequence location is 3R:25324562..25329519. It has the cytological map location 99B1. There is experimental evidence that it has the molecular function</span>: protein binding. There is experimental evidence that it is involved in the biological proc…	2	0.000142299	1	5primeCassette	279	1069			altexon
FBgn0039644	CG11897	3R	24983847	This gene is referred to in FlyBase by the symbol Dmel\CG11897 (CG11897, FBgn0039644). It is a protein_coding_gene from Drosophila melanogaster. Its sequence location is 3R:24983847..24990694. It has the cytological map location 98F13. Based on sequence similarity, it is predicted to have molecular function</span>: xenobiotic-transporting ATPase activity; drug transporter activity. An electronic …	2	0.000169743	1	5					altexon
FBgn0034491	CG11055	2R	16145157	This gene is referred to in FlyBase by the symbol Dmel\CG11055 (CG11055, FBgn0034491). It is a protein_coding_gene from Drosophila melanogaster. Its sequence location is 2R:16145157..16149241. It has the cytological map location 56F11. Based on sequence similarity, it is predicted to have molecular function</span>: triglyceride lipase activity. An electronic pipeline based on InterPro domains sug…	2	0.000181922	1	5primeCassette		101			altexon
FBgn0037336	CG2519	3R	1373490	This gene is referred to in FlyBase by the symbol Dmel\CG2519 (CG2519, FBgn0037336). It is a protein_coding_gene from Drosophila melanogaster. Its sequence location is 3R:1365225..1373490. It has the cytological map location 83B1. Its molecular function is unknown. The biological processes in which it is involved are not known. 6 alleles are reported. No phenotypic data is available. It has 2 ann…	2	0.000184887	6.25195e-20					72
FBgn0029504	CHES-1-like	X	7598851	The gene Checkpoint suppressor homologue is referred to in FlyBase by the symbol Dmel\CHES-1-like (CG12690, FBgn0029504). It is a protein_coding_gene from Drosophila melanogaster. Its sequence location is X:7577491..7598851. It has the cytological map location 7B6. Based on sequence similarity, it is predicted to have molecular function</span>: transcription factor activity. There is experimental…	2	0.000187019	1	5primeCassette		41			altexon
FBgn0032136	CG15828	2L	9641350	This gene is referred to in FlyBase by the symbol Dmel\CG15828 (CG15828, FBgn0032136). It is a protein_coding_gene from Drosophila melanogaster. Its sequence location is 2L:9641350..9656029. It has the cytological map location 30C2. Based on sequence similarity, it is predicted to have molecular function</span>: lipid binding. An electronic pipeline based on InterPro domains suggests that it is i…	2	0.000192427	3.19696e-35						altexon
FBgn0053558	CG33558	2R	2859139	This gene is referred to in FlyBase by the symbol Dmel\CG33558 (CG33558, FBgn0053558). It is a protein_coding_gene from Drosophila melanogaster. Its sequence location is 2R:2813207..2859139. It has the cytological map location 42E1. Based on sequence similarity, it is predicted to have molecular function</span>: actin binding. Based on sequence similarity, it is predicted to be involved in the bi…	4	0.000204643	6.90203e-31		1			1635	altexon
FBgn0035975	PGRP-LA	3L	9327432	The gene Peptidoglycan recognition protein LA is referred to in FlyBase by the symbol Dmel\PGRP-LA (CG32042, FBgn0035975). It is a protein_coding_gene from Drosophila melanogaster. Its sequence location is 3L:9327432..9331436. It has the cytological map location 67B1. Based on sequence similarity, it is predicted to have molecular function</span>: peptidoglycan binding. Based on sequence similari…	3	0.00021518	1	1					altexon
FBgn0000037	mAcR-60C	2R	20277235	The gene muscarinic Acetylcholine Receptor 60C is referred to in FlyBase by the symbol Dmel\mAcR-60C (CG4356, FBgn0000037). It is a protein_coding_gene from Drosophila melanogaster. Its sequence location is 2R:20266159..20277235. It has the cytological map location 60C7. There is experimental evidence that it has the molecular function</span>: muscarinic acetylcholine receptor activity. Based on …	2	0.000259761	6.29526e-09						altexon
FBgn0028428	Ih	2R	10166938	The gene I<down>h</down> channel is referred to in FlyBase by the symbol Dmel\Ih (CG8585, FBgn0028428). It is a protein_coding_gene from Drosophila melanogaster. Its sequence location is 2R:10166938..10186413. It has the cytological map location 50E6-50F1. Based on sequence similarity, it is predicted to have molecular function</span>: intracellular cyclic nucleotide activated cation channel acti…	5	0.000263119	5.46417e-42	5primeCassette		210		96	altexon
FBgn0003896	tup	2L	18881256	The gene tailup is referred to in FlyBase by the symbol Dmel\tup (CG10619, FBgn0003896). It is a protein_coding_gene from Drosophila melanogaster. Its sequence location is 2L:18859500..18881256. It has the cytological map location 37B1. It is reported to have molecular function</span>: specific RNA polymerase II transcription factor activity. There is experimental evidence that it is involved in …	2	0.000279511	3.51411e-07		15				altexon
FBgn0039945	CG17159	XHet	75553	This gene is referred to in FlyBase by the symbol Dmel\CG17159 (CG17159, FBgn0039945). It is a protein_coding_gene from Drosophila melanogaster. Its sequence location is XHet:63778..75553. It has the cytological map location 20E. Its molecular function is unknown. The biological processes in which it is involved are not known. 2 alleles are reported. No phenotypic data is available. It has 3 anno…	2	0.000300393	2.17099e-29	5primeCassette	3primeCassette	29	520	416	altexon
FBgn0035497	CG14995	3L	4102697	This gene is referred to in FlyBase by the symbol Dmel\CG14995 (CG14995, FBgn0035497). It is a protein_coding_gene from Drosophila melanogaster. Its sequence location is 3L:4094343..4102697. It has the cytological map location 64A5-64A6. Its molecular function is unknown. There is experimental evidence that it is involved in the biological process</span>: autophagic cell death; salivary gland cel…	3	0.000303884	0.00111614		161				altexon
FBgn0003079	phl	X	2227994	The gene pole hole is referred to in FlyBase by the symbol Dmel\phl (CG2845, FBgn0003079). It is a protein_coding_gene from Drosophila melanogaster. Its sequence location is X:2227994..2237904. It has the cytological map location 3A1. There is experimental evidence that it has the molecular function</span>: protein binding. There is experimental evidence for 13 unique biological process</span> te…	2	0.000322848	1	5primeCassette		43			altexon
FBgn0010482	l(2)01289	2R	2628149	The gene lethal (2) 01289 is referred to in FlyBase by the symbol Dmel\l(2)01289 (CG9432, FBgn0010482). It is a protein_coding_gene from Drosophila melanogaster. Its sequence location is 2R:2608606..2628149. It has the cytological map location 42C6-42C7. Based on sequence similarity, it is predicted to have molecular function</span>: protein disulfide isomerase activity. An electronic pipeline ba…	5	0.000323147	2.72648e-23		3primeCassette		678	315	altexon
FBgn0004401	Pep	3L	17638131	The gene Protein on ecdysone puffs is referred to in FlyBase by the symbol Dmel\Pep (CG6143, FBgn0004401). It is a protein_coding_gene from Drosophila melanogaster. Its sequence location is 3L:17631217..17638131. It has the cytological map location 74E4. There is experimental evidence that it has the molecular function</span>: single-stranded RNA binding; single-stranded DNA binding; DNA binding.…	3	0.000327955	5.64751e-58					101
FBgn0022382	Pka-R2	2R	5913540	The gene cAMP-dependent protein kinase R2 is referred to in FlyBase by the symbol Dmel\Pka-R2 (CG15862, FBgn0022382). It is a protein_coding_gene from Drosophila melanogaster. Its sequence location is 2R:5883325..5913540. It has the cytological map location 46D1-46D4. There is experimental evidence that it has the molecular function</span>: protein binding. There is experimental evidence that it …	3	0.000405261	0.879846						altexon
FBgn0042135	CG18812	2R	3623124	This gene is referred to in FlyBase by the symbol Dmel\CG18812 (CG18812, FBgn0042135). It is a protein_coding_gene from Drosophila melanogaster. Its sequence location is 2R:3605833..3623124. It has the cytological map location 43E12-43E13. Its molecular function is unknown. The biological processes in which it is involved are not known. 9 alleles are reported. No phenotypic data is available. It …	2	0.000417853	3.6232e-09	5primeCassette		243			altexon
FBgn0004648	svr	X	390504	The gene silver is referred to in FlyBase by the symbol Dmel\svr (CG4122, FBgn0004648). It is a protein_coding_gene from Drosophila melanogaster. Its sequence location is X:390504..403113. It has the cytological map location 1B5-1B7. There is experimental evidence that it has the molecular function</span>: carboxypeptidase activity; metallocarboxypeptidase activity. There is experimental evidence…	3	0.000450848	7.27879e-45	5primeCassette		919		760	altexon
FBgn0259245	CG42343	X	21328761	This gene is referred to in FlyBase by the symbol Dmel\CG42343 (CG42343, FBgn0259245). It is a protein_coding_gene from Drosophila melanogaster. Its sequence location is X:21295615..21328761. It has the cytological map location 20A1. Its molecular function is unknown. The biological processes in which it is involved are not known. 8 alleles are reported. No phenotypic data is available. It has 4 …	2	0.000607218	0.53651						altexon
FBgn0037956	CG6959	3R	7695183	This gene is referred to in FlyBase by the symbol Dmel\CG6959 (CG6959, FBgn0037956). It is a protein_coding_gene from Drosophila melanogaster. Its sequence location is 3R:7648424..7695183. It has the cytological map location 86F9-86F11. Its molecular function is unknown. The biological processes in which it is involved are not known. 11 alleles are reported. No phenotypic data is available. It ha…	2	0.000616807	1					69
FBgn0024187	syd	3L	7929063	The gene sunday driver is referred to in FlyBase by the symbol Dmel\syd (CG8110, FBgn0024187). It is a protein_coding_gene from Drosophila melanogaster. Its sequence location is 3L:7919125..7929063. It has the cytological map location 66A20. There is experimental evidence that it has the molecular function</span>: kinesin binding. There is experimental evidence that it is involved in the biologic…	3	0.000625432	3.75862e-36	5primeCassette	567	586		18	altexon
FBgn0037470	CG1091	3R	2911811	This gene is referred to in FlyBase by the symbol Dmel\CG1091 (CG1091, FBgn0037470). It is a protein_coding_gene from Drosophila melanogaster. Its sequence location is 3R:2908945..2911811. It has the cytological map location 84B2. Its molecular function is unknown. The biological processes in which it is involved are not known. 4 alleles are reported. No phenotypic data is available. It has 2 ann…	2	0.000634194	1	5primeCassette		208			altexon
FBgn0039830	CG1746	3R	27045357	This gene is referred to in FlyBase by the symbol Dmel\CG1746 (CG1746, FBgn0039830). It is a protein_coding_gene from Drosophila melanogaster. Its sequence location is 3R:27041864..27045357. It has the cytological map location 100B7. Based on sequence similarity, it is predicted to have molecular function</span>: hydrogen-exporting ATPase activity, phosphorylative mechanism. Based on sequence sim…	2	0.00064136	1	5primeCassette		100			altexon
FBgn0053181	CG33181	X	8383382	This gene is referred to in FlyBase by the symbol Dmel\CG33181 (CG33181, FBgn0053181). It is a protein_coding_gene from Drosophila melanogaster. Its sequence location is X:8383382..8410015. It has the cytological map location 7F1. Its molecular function is unknown. The biological processes in which it is involved are not known. 10 alleles are reported. No phenotypic data is available. It has 5 an…	3	0.000642159	3.17273e-15	5primeCassette		182			altexon
FBgn0029834	CG5937	X	5934735	This gene is referred to in FlyBase by the symbol Dmel\CG5937 (CG5937, FBgn0029834). It is a protein_coding_gene from Drosophila melanogaster. Its sequence location is X:5934735..5942543. It has the cytological map location 5D2-5D3. An electronic pipeline based on InterPro domains suggests that it has the molecular function</span>: ARF guanyl-nucleotide exchange factor activity. An electronic pip…	2	0.000650622	1	5primeCassette		85			altexon
FBgn0026239	gukh	3R	14809747	The gene GUK-holder is referred to in FlyBase by the symbol Dmel\gukh (CG31043, FBgn0026239). It is a protein_coding_gene from Drosophila melanogaster. Its sequence location is 3R:14809747..14848160. It has the cytological map location 91E2-91E3. There is experimental evidence that it has the molecular function</span>: protein binding. There is experimental evidence that it is involved in the bio…	3	0.000668976	1					753
FBgn0026077	Gasp	3R	1926609	The gene Gasp is referred to in FlyBase by the symbol Dmel\Gasp (CG10287, FBgn0026077). It is a protein_coding_gene from Drosophila melanogaster. Its sequence location is 3R:1914951..1926609. It has the cytological map location 83D4. Based on sequence similarity, it is predicted to have molecular function</span>: chitin binding; structural constituent of peritrophic membrane. An electronic pipeli…	2	0.000701584	1		3primeCassette		465		altexon
FBgn0038947	sar1	3R	18182397	The gene sar1 is referred to in FlyBase by the symbol Dmel\sar1 (CG7073, FBgn0038947). It is a protein_coding_gene from Drosophila melanogaster. Its sequence location is 3R:18182397..18186440. It has the cytological map location 94A5-94A6. Based on sequence similarity, it is predicted to have molecular function</span>: GTPase activity; GTP binding. There is experimental evidence that it is involv…	2	0.000727817	1						altexon
FBgn0039923	MED26	4	809604	The gene Mediator complex subunit 26 is referred to in FlyBase by the symbol Dmel\MED26 (CG1793, FBgn0039923). It is a protein_coding_gene from Drosophila melanogaster. Its sequence location is 4:799080..809604. It has the cytological map location 102E1. Based on sequence similarity, it is predicted to have molecular function</span>: transcription factor activity; RNA polymerase II transcription …	2	0.000745001	1	5primeCassette		84		185
FBgn0039890	CG2316	4	214448	This gene is referred to in FlyBase by the symbol Dmel\CG2316 (CG2316, FBgn0039890). It is a protein_coding_gene from Drosophila melanogaster. Its sequence location is 4:204842..214448. It has the cytological map location 102A6. Based on sequence similarity, it is predicted to have molecular function</span>: ATPase activity, coupled to transmembrane movement of substances; transporter activity. A…	4	0.000833477	5.50398e-12	18				78	altexon
FBgn0250910	Octbeta3R	3R	8373951	The gene OctÎ²3R is referred to in FlyBase by the symbol Dmel\OctÎ²3R (CG42244, FBgn0250910). It is a protein_coding_gene from Drosophila melanogaster. Its sequence location is 3R:8337292..8373951. It has the cytological map location 87B15-87C1. There is experimental evidence that it has the molecular function</span>: octopamine receptor activity. Based on sequence similarity, it is predicted to …	3	0.00102955	2.23148e-24					414
FBgn0034501	CG13868	2R	16204415	This gene is referred to in FlyBase by the symbol Dmel\CG13868 (CG13868, FBgn0034501). It is a protein_coding_gene from Drosophila melanogaster. Its sequence location is 2R:16196217..16204415. It has the cytological map location 56F16. Its molecular function is unknown. The biological processes in which it is involved are not known. 6 alleles are reported. No phenotypic data is available. It has …	2	0.00104391	4.3547e-47	5primeCassette		460			altexon
FBgn0000042	Act5C	X	5794897	The gene Actin 5C is referred to in FlyBase by the symbol Dmel\Act5C (CG4027, FBgn0000042). It is a protein_coding_gene from Drosophila melanogaster. Its sequence location is X:5794897..5798823. It has the cytological map location 5C7. Based on sequence similarity, it is predicted to have molecular function</span>: structural constituent of cytoskeleton. There is experimental evidence that it is …	2	0.00105297	1.5693e-48	5primeCassette		150			altexon
FBgn0002174	l(2)tid	2R	19594385	The gene lethal (2) tumorous imaginal discs is referred to in FlyBase by the symbol Dmel\l(2)tid (CG5504, FBgn0002174). It is a protein_coding_gene from Drosophila melanogaster. Its sequence location is 2R:19594385..19596561. It has the cytological map location 59F6. There is experimental evidence that it has the molecular function</span>: patched binding. There is experimental evidence that it i…	2	0.00106659	1		2				altexon
FBgn0037702	CG8176	3R	5341758	This gene is referred to in FlyBase by the symbol Dmel\CG8176 (CG8176, FBgn0037702). It is a protein_coding_gene from Drosophila melanogaster. Its sequence location is 3R:5341758..5352964. It has the cytological map location 85D19. An electronic pipeline based on InterPro domains suggests that it has the molecular function</span>: protein binding. An electronic pipeline based on InterPro domains …	4	0.00115873	1	5primeCassette	5	132			altexon
FBgn0025936	Eph	4	631312	The gene Eph receptor tyrosine kinase is referred to in FlyBase by the symbol Dmel\Eph (CG1511, FBgn0025936). It is a protein_coding_gene from Drosophila melanogaster. Its sequence location is 4:631312..641552. It has the cytological map location 102D1. Based on sequence similarity, it is predicted to have molecular function</span>: ephrin receptor activity; transmembrane receptor protein tyrosin…	3	0.00120111	3.15351e-07		575			48	altexon
FBgn0039844	CG1607	3R	27207832	This gene is referred to in FlyBase by the symbol Dmel\CG1607 (CG1607, FBgn0039844). It is a protein_coding_gene from Drosophila melanogaster. Its sequence location is 3R:27207832..27217622. It has the cytological map location 100C2-100C3. Based on sequence similarity, it is predicted to have molecular function</span>: amino acid transmembrane transporter activity. Based on sequence similarity, i…	2	0.00122377	0.226807	5primeCassette		226			altexon
FBgn0024734	PRL-1	2L	16257603	The gene PRL-1 is referred to in FlyBase by the symbol Dmel\PRL-1 (CG4993, FBgn0024734). It is a protein_coding_gene from Drosophila melanogaster. Its sequence location is 2L:16245826..16257603. It has the cytological map location 35F1. Based on sequence similarity, it is predicted to have molecular function</span>: prenylated protein tyrosine phosphatase activity. It is reported to be involved i…	2	0.00149783	0.000281157	5primeCassette		528			altexon
FBgn0027108	inx2	X	6892696	The gene innexin 2 is referred to in FlyBase by the symbol Dmel\inx2 (CG4590, FBgn0027108). It is a protein_coding_gene from Drosophila melanogaster. Its sequence location is X:6892696..6898182. It has the cytological map location 6E4. It is reported to have molecular function</span>: gap junction channel activity. There is experimental evidence that it is involved in the biological process</span…	2	0.00181509	1.2401e-174	12					altexon
FBgn0004198	ct	X	7503181	The gene cut is referred to in FlyBase by the symbol Dmel\ct (CG11387, FBgn0004198). It is a protein_coding_gene from Drosophila melanogaster. Its sequence location is X:7503181..7570056. It has the cytological map location 7B4-7B6. It is reported to have molecular function</span>: specific RNA polymerase II transcription factor activity; DNA binding. There is experimental evidence for 12 unique …	3	0.00185037	4.94937e-09	5primeCassette	3primeCassette	391	4620	36	altexon
FBgn0003517	sta	X	1377446	The gene stubarista is referred to in FlyBase by the symbol Dmel\sta (CG14792, FBgn0003517). It is a protein_coding_gene from Drosophila melanogaster. Its sequence location is X:1375830..1377446. It has the cytological map location 2B1. Based on sequence similarity, it is predicted to have molecular function</span>: structural constituent of ribosome. There is experimental evidence that it is inv…	2	0.00187854	1.61297e-17	5primeCassette		156			altexon
FBgn0004368	Ptp4E	X	4833165	The gene Protein tyrosine phosphatase 4E is referred to in FlyBase by the symbol Dmel\Ptp4E (CG6899, FBgn0004368). It is a protein_coding_gene from Drosophila melanogaster. Its sequence location is X:4833165..4849458. It has the cytological map location 4D7. Based on sequence similarity, it is predicted to have molecular function</span>: transmembrane receptor protein tyrosine phosphatase activit…	3	0.00210927	1		3primeCassette		455		altexon
FBgn0031907	CG5171	2L	7395832	This gene is referred to in FlyBase by the symbol Dmel\CG5171 (CG5171, FBgn0031907). It is a protein_coding_gene from Drosophila melanogaster. Its sequence location is 2L:7395832..7404526. It has the cytological map location 27F3. Based on sequence similarity, it is predicted to have molecular function</span>: trehalose-phosphatase activity. An electronic pipeline based on InterPro domains sugges…	3	0.00229478	0.490859	5primeCassette		104			altexon
FBgn0001128	Gpdh	2L	5943682	The gene Glycerol 3 phosphate dehydrogenase is referred to in FlyBase by the symbol Dmel\Gpdh (CG9042, FBgn0001128). It is a protein_coding_gene from Drosophila melanogaster. Its sequence location is 2L:5943682..5949092. It has the cytological map location 26A3. Based on sequence similarity, it is predicted to have molecular function</span>: glycerol-3-phosphate dehydrogenase (NAD+) activity. The…	3	0.00232064	3.93733e-236		3primeCassette		457		altexon
FBgn0000055	Adh	2L	14615555	The gene Alcohol dehydrogenase is referred to in FlyBase by the symbol Dmel\Adh (CG3481, FBgn0000055). It is a protein_coding_gene from Drosophila melanogaster. Its sequence location is 2L:14615555..14618902. It has the cytological map location 35B3. There is experimental evidence that it has the molecular function</span>: protein homodimerization activity; alcohol dehydrogenase (NAD) activity; a…	2	0.00233441	7.41959e-222	5primeCassette		89			altexon
FBgn0001203	Hk	X	10148337	The gene Hyperkinetic is referred to in FlyBase by the symbol Dmel\Hk (CG32688, FBgn0001203). It is a protein_coding_gene from Drosophila melanogaster. Its sequence location is X:10132277..10148337. It has the cytological map location 9B5. Based on sequence similarity, it is predicted to have molecular function</span>: voltage-gated potassium channel activity. There is experimental evidence that …	2	0.00259598	4.62829e-13	5primeCassette		302			altexon
FBgn0011672	Mvl	3R	16886517	The gene Malvolio is referred to in FlyBase by the symbol Dmel\Mvl (CG3671, FBgn0011672). It is a protein_coding_gene from Drosophila melanogaster. Its sequence location is 3R:16877105..16886517. It has the cytological map location 93B7-93B8. There is experimental evidence that it has the molecular function</span>: manganese ion transmembrane transporter activity; iron ion transmembrane transport…	4	0.00269834	2.00307e-19	5primeCassette	3primeCassette	51	860	372	altexon
FBgn0010238	Lac	2R	8340696	The gene Lachesin is referred to in FlyBase by the symbol Dmel\Lac (CG12369, FBgn0010238). It is a protein_coding_gene from Drosophila melanogaster. Its sequence location is 2R:8340696..8353154. It has the cytological map location 49A6-49A7. Its molecular function is unknown. There is experimental evidence that it is involved in the biological process</span>: morphogenesis of embryonic epithelium…	2	0.00270475	1.05159e-40						altexon
FBgn0000541	E(bx)	3L	246901	The gene Enhancer of bithorax is referred to in FlyBase by the symbol Dmel\E(bx) (CG32346, FBgn0000541). It is a protein_coding_gene from Drosophila melanogaster. Its sequence location is 3L:234101..246901. It has the cytological map location 61B2-61B3. There is experimental evidence that it has the molecular function</span>: ligand-dependent nuclear receptor binding. There is experimental eviden…	2	0.00272578	1		3primeCassette		404		altexon
FBgn0259228	C3G	X	6697579	The gene C3G is referred to in FlyBase by the symbol Dmel\C3G (CG42328, FBgn0259228). It is a protein_coding_gene from Drosophila melanogaster. Its sequence location is X:6675449..6697579. It has the cytological map location 6D2. There is experimental evidence that it has the molecular function</span>: Ras guanyl-nucleotide exchange factor activity. There is experimental evidence that it is invol…	4	0.00274998	9.56719e-14	5primeCassette		440		642
FBgn0000053	ade3	2L	7023940	The gene adenosine 3 is referred to in FlyBase by the symbol Dmel\ade3 (CG31628, FBgn0000053). It is a protein_coding_gene from Drosophila melanogaster. Its sequence location is 2L:7014861..7023940. It has the cytological map location 27D4. Based on sequence similarity, it is predicted to have molecular function</span>: phosphoribosylamine-glycine ligase activity; phosphoribosylformylglycinamidin…	2	0.00277907	1		3primeCassette		1514		altexon
FBgn0052000	CG32000	4	152850	This gene is referred to in FlyBase by the symbol Dmel\CG32000 (CG32000, FBgn0052000). It is a protein_coding_gene from Drosophila melanogaster. Its sequence location is 4:152850..163754. It has the cytological map location 102A3-102A4. Based on sequence similarity, it is predicted to have molecular function</span>: ATPase activity, coupled to transmembrane movement of ions. Based on sequence sim…	2	0.00322386	1						altexon
FBgn0030520	CG10990	X	13649421	This gene is referred to in FlyBase by the symbol Dmel\CG10990 (CG10990, FBgn0030520). It is a protein_coding_gene from Drosophila melanogaster. Its sequence location is X:13640511..13649421. It has the cytological map location 12B4-12B10. Its molecular function is unknown. The biological processes in which it is involved are not known. 17 alleles are reported. No phenotypic data is available. It…	2	0.00323656	9.50975e-39	15	150				altexon
FBgn0020762	Atet	2L	4333926	The gene ABC transporter expressed in trachea is referred to in FlyBase by the symbol Dmel\Atet (CG2969, FBgn0020762). It is a protein_coding_gene from Drosophila melanogaster. Its sequence location is 2L:4333926..4345776. It has the cytological map location 24E1. Based on sequence similarity, it is predicted to have molecular function</span>: ATPase activity, coupled to transmembrane movement of…	3	0.00345067	2.2307e-07						altexon
FBgn0035032	CG4692	2R	20487344	This gene is referred to in FlyBase by the symbol Dmel\CG4692 (CG4692, FBgn0035032). It is a protein_coding_gene from Drosophila melanogaster. Its sequence location is 2R:20486611..20487344. It has the cytological map location 60D9. Based on sequence similarity, it is predicted to have molecular function</span>: hydrogen-exporting ATPase activity, phosphorylative mechanism. Based on sequence simi…	2	0.00444717	1	42					altexon
FBgn0040382	CG5273	X	653628	This gene is referred to in FlyBase by the symbol Dmel\CG5273 (CG5273, FBgn0040382). It is a protein_coding_gene from Drosophila melanogaster. Its sequence location is X:653628..655972. It has the cytological map location 1C4. Its molecular function is unknown. There is experimental evidence that it is involved in the biological process</span>: regulation of circadian rhythm. 5 alleles are report…	3	0.004571	1	23					altexon
FBgn0038938	CG7084	3R	18124538	This gene is referred to in FlyBase by the symbol Dmel\CG7084 (CG7084, FBgn0038938). It is a protein_coding_gene from Drosophila melanogaster. Its sequence location is 3R:18124538..18130142. It has the cytological map location 94A4. Based on sequence similarity, it is predicted to have molecular function</span>: secondary active organic cation transmembrane transporter activity. An electronic pip…	2	0.00484442	0.36584	5primeCassette		120			altexon
FBgn0038016	MBD-R2	3R	8182024	The gene MBD-R2 is referred to in FlyBase by the symbol Dmel\MBD-R2 (CG10042, FBgn0038016). It is a protein_coding_gene from Drosophila melanogaster. Its sequence location is 3R:8177865..8182024. It has the cytological map location 87B7-87B8. An electronic pipeline based on InterPro domains suggests that it has the molecular function</span>: protein binding; DNA binding; zinc ion binding. The bio…	2	0.00497363	1.37438e-05	63					altexon
FBgn0011205	fbl	3L	20377531	The gene fumble is referred to in FlyBase by the symbol Dmel\fbl (CG5725, FBgn0011205). It is a protein_coding_gene from Drosophila melanogaster. Its sequence location is 3L:20377531..20385013. It has the cytological map location 77B9-77C1. Based on sequence similarity, it is predicted to have molecular function</span>: pantothenate kinase activity. There is experimental evidence that it is invol…	4	0.00499479	3.48152e-17	5primeCassette	459	428			altexon
FBgn0259220	Doa	3R	24713799	The gene Darkener of apricot is referred to in FlyBase by the symbol Dmel\Doa (CG42320, FBgn0259220). It is a protein_coding_gene from Drosophila melanogaster. Its sequence location is 3R:24713799..24748494. It has the cytological map location 98F1-98F2. There is experimental evidence that it has the molecular function</span>: protein serine/threonine kinase activity; protein kinase activity. The…	5	0.00527685	2.58678e-09	5primeCassette		338			altexon
FBgn0015222	Fer1HCH	3R	26213851	The gene Ferritin 1 heavy chain homologue is referred to in FlyBase by the symbol Dmel\Fer1HCH (CG2216, FBgn0015222). It is a protein_coding_gene from Drosophila melanogaster. Its sequence location is 3R:26211290..26213851. It has the cytological map location 99F2. There is experimental evidence that it has the molecular function</span>: ferrous iron binding. There is experimental evidence that i…	3	0.00540521	9.76514e-84						altexon
FBgn0030613	rab3-GEF	X	14987286	The gene rab3-GEF is referred to in FlyBase by the symbol Dmel\rab3-GEF (CG5627, FBgn0030613). It is a protein_coding_gene from Drosophila melanogaster. Its sequence location is X:14987286..15007795. It has the cytological map location 13A11-13A12. Based on sequence similarity, it is predicted to have molecular function</span>: Rab guanyl-nucleotide exchange factor activity. Based on sequence sim…	2	0.00542226	8.85855e-22					95	altexon
FBgn0031089	CG9572	X	20042159	This gene is referred to in FlyBase by the symbol Dmel\CG9572 (CG9572, FBgn0031089). It is a protein_coding_gene from Drosophila melanogaster. Its sequence location is X:20042159..20049547. It has the cytological map location 19B3. Its molecular function is unknown. The biological processes in which it is involved are not known. One allele is reported. No phenotypic data is available. It has 3 an…	2	0.00553298	3.06851e-12						altexon
FBgn0043904	bru-2	2L	12344381	The gene bruno-2 is referred to in FlyBase by the symbol Dmel\bru-2 (CG31761, FBgn0043904). It is a protein_coding_gene from Drosophila melanogaster. Its sequence location is 2L:12344381..12397534. It has the cytological map location 33E1-33E3. Based on sequence similarity, it is predicted to have molecular function</span>: RNA binding; mRNA binding. Based on sequence similarity, it is predicted …	2	0.00560106	0.15824					468
FBgn0000308	chic	2L	5981025	The gene chickadee is referred to in FlyBase by the symbol Dmel\chic (CG9553, FBgn0000308). It is a protein_coding_gene from Drosophila melanogaster. Its sequence location is 2L:5972900..5981025. It has the cytological map location 26A5-26B2. There is experimental evidence that it has the molecular function</span>: protein binding. There is experimental evidence for 11 unique biological process</…	2	0.00567909	1.40527e-09	5primeCassette		75		159
FBgn0259225	Pde1c	2L	11928570	The gene Phosphodiesterase 1c is referred to in FlyBase by the symbol Dmel\Pde1c (CG42325, FBgn0259225). It is a protein_coding_gene from Drosophila melanogaster. Its sequence location is 2L:11814826..11928570. It has the cytological map location 33A8-33B1. There is experimental evidence that it has the molecular function</span>: 3',5'-cyclic-GMP phosphodiesterase activity; 3',5'-cyclic-AMP phosp…	4	0.00587964	2.91283e-33	5primeCassette		202			altexon
FBgn0083228	Frq2	X	18080190	The gene Frequenin 2 is referred to in FlyBase by the symbol Dmel\Frq2 (CG5907, FBgn0083228). It is a protein_coding_gene from Drosophila melanogaster. Its sequence location is X:18080190..18096871. It has the cytological map location 17A1-17A2. An electronic pipeline based on InterPro domains suggests that it has the molecular function</span>: calcium ion binding. There is experimental evidence …	2	0.00639983	1						altexon
FBgn0021764	sdk	X	580873	The gene sidekick is referred to in FlyBase by the symbol Dmel\sdk (CG5227, FBgn0021764). It is a protein_coding_gene from Drosophila melanogaster. Its sequence location is X:580873..643529. It has the cytological map location 1C2-1C3. Its molecular function is unknown. There is experimental evidence that it is involved in the biological process</span>: negative regulation of photoreceptor cell d…	3	0.00646887	1						altexon
FBgn0050492	CG30492	2R	3510749	This gene is referred to in FlyBase by the symbol Dmel\CG30492 (CG30492, FBgn0050492). It is a protein_coding_gene from Drosophila melanogaster. Its sequence location is 2R:3510749..3539292. It has the cytological map location 43E5-43E7. An electronic pipeline based on InterPro domains suggests that it has the molecular function</span>: zinc ion binding. There is experimental evidence that it is …	4	0.00661659	3.66228e-12	5primeCassette		312			altexon
FBgn0032666	CG5758	2L	18120027	This gene is referred to in FlyBase by the symbol Dmel\CG5758 (CG5758, FBgn0032666). It is a protein_coding_gene from Drosophila melanogaster. Its sequence location is 2L:18120027..18129864. It has the cytological map location 36E5. Its molecular function is unknown. The biological processes in which it is involved are not known. 9 alleles are reported. The phenotype of these alleles is annotated…	2	0.00702149	1	5primeCassette		46			altexon
FBgn0000363	cpo	3R	13757595	The gene couch potato is referred to in FlyBase by the symbol Dmel\cpo (CG31243, FBgn0000363). It is a protein_coding_gene from Drosophila melanogaster. Its sequence location is 3R:13757595..13841501. It has the cytological map location 90D1-90E1. Based on sequence similarity, it is predicted to have molecular function</span>: mRNA binding. There is experimental evidence that it is involved in th…	3	0.00722884	0.00128648	5primeCassette	1047	580		617	altexon
FBgn0014963	gpp	3R	2232598	The gene grappa is referred to in FlyBase by the symbol Dmel\gpp (CG10272, FBgn0014963). It is a protein_coding_gene from Drosophila melanogaster. Its sequence location is 3R:2232598..2271735. It has the cytological map location 83E6-83E7. There is experimental evidence that it has the molecular function</span>: histone methyltransferase activity (H3-K79 specific). The biological processes in whi…	2	0.00754969	1						altexon
FBgn0032840	sNPF	2L	20027915	The gene short neuropeptide F precursor is referred to in FlyBase by the symbol Dmel\sNPF (CG13968, FBgn0032840). It is a protein_coding_gene from Drosophila melanogaster. Its sequence location is 2L:20027915..20056375. It has the cytological map location 38B1. Based on sequence similarity, it is predicted to have molecular function</span>: neuropeptide hormone activity. There is experimental evi…	2	0.00792453	1.58861e-72						altexon
FBgn0029996	Ubc-E2H	X	7988097	The gene Ubc-E2H is referred to in FlyBase by the symbol Dmel\Ubc-E2H (CG2257, FBgn0029996). It is a protein_coding_gene from Drosophila melanogaster. Its sequence location is X:7982035..7988097. It has the cytological map location 7D6. Based on sequence similarity, it is predicted to have molecular function</span>: ubiquitin-protein ligase activity. An electronic pipeline based on InterPro domai…	3	0.00821682	1	5primeCassette		290		186
FBgn0027585	CG8740	2R	4623324	This gene is referred to in FlyBase by the symbol Dmel\CG8740 (CG8740, FBgn0027585). It is a protein_coding_gene from Drosophila melanogaster. Its sequence location is 2R:4623324..4647095. It has the cytological map location 44E3-44E4. Its molecular function is unknown. The biological processes in which it is involved are not known. 6 alleles are reported. No phenotypic data is available. It has …	2	0.00826414	2.17465e-11					325
FBgn0032957	CG2225	2L	21677530	This gene is referred to in FlyBase by the symbol Dmel\CG2225 (CG2225, FBgn0032957). It is a protein_coding_gene from Drosophila melanogaster. Its sequence location is 2L:21663792..21677530. It has the cytological map location 39E6-39E7. Its molecular function is unknown. The biological processes in which it is involved are not known. 11 alleles are reported. No phenotypic data is available. It h…	4	0.00970948	3.1096e-05	5primeCassette		32			altexon
FBgn0261854	aPKC	2R	10850451	The gene atypical protein kinase C is referred to in FlyBase by the symbol Dmel\aPKC (CG42783, FBgn0261854). It is a protein_coding_gene from Drosophila melanogaster. Its sequence location is 2R:10831960..10850451. It has the cytological map location 51D5. There is experimental evidence that it has the molecular function</span>: protein binding. There is experimental evidence that it is involved …	4	0.0103325	4.99049e-20	5primeCassette	3primeCassette	252	773	429	altexon
FBgn0004399	psq	2R	6445409	The gene pipsqueak is referred to in FlyBase by the symbol Dmel\psq (CG2368, FBgn0004399). It is a protein_coding_gene from Drosophila melanogaster. Its sequence location is 2R:6445409..6503753. It has the cytological map location 47A13-47B1. It is reported to have molecular function</span>: DNA binding. There is experimental evidence that it is involved in the biological process</span>: olfactor…	2	0.0108075	0.154215	5primeCassette		630			altexon
FBgn0052425	CG32425	3L	20490412	This gene is referred to in FlyBase by the symbol Dmel\CG32425 (CG32425, FBgn0052425). It is a protein_coding_gene from Drosophila melanogaster. Its sequence location is 3L:20490412..20507212. It has the cytological map location 77C6. Its molecular function is unknown. The biological processes in which it is involved are not known. 10 alleles are reported. No phenotypic data is available. It has …	4	0.0111695	1.05394e-44	5primeCassette	3primeCassette	83	975		altexon
FBgn0039348	CG4673	3R	21450382	This gene is referred to in FlyBase by the symbol Dmel\CG4673 (CG4673, FBgn0039348). It is a protein_coding_gene from Drosophila melanogaster. Its sequence location is 3R:21436735..21450382. It has the cytological map location 96E4-96E6. Based on sequence similarity, it is predicted to have molecular function</span>: structural constituent of nuclear pore. The biological processes in which it is …	2	0.0120285	1	5primeCassette	40	72			altexon
FBgn0261710	nocte	X	10367618	The gene no circadian temperature entrainment is referred to in FlyBase by the symbol Dmel\nocte (CG17255, FBgn0261710). It is a protein_coding_gene from Drosophila melanogaster. Its sequence location is X:10357851..10367618. It has the cytological map location 9C6-9D1. Its molecular function is unknown. There is experimental evidence that it is involved in the biological process</span>: entrainm…	2	0.0122554	1	21					altexon
FBgn0036518	RhoGAP71E	3L	15581980	The gene RhoGAP71E is referred to in FlyBase by the symbol Dmel\RhoGAP71E (CG32149, FBgn0036518). It is a protein_coding_gene from Drosophila melanogaster. Its sequence location is 3L:15581980..15602142. It has the cytological map location 71E1-71E2. Its molecular function is unknown. An electronic pipeline based on InterPro domains suggests that it is involved in the biological process</span>: s…	3	0.0128203	0.00133903					445
FBgn0002968	Nrg	X	8411406	The gene Neuroglian is referred to in FlyBase by the symbol Dmel\Nrg (CG1634, FBgn0002968). It is a protein_coding_gene from Drosophila melanogaster. Its sequence location is X:8411406..8446152. It has the cytological map location 7F2-7F4. There is experimental evidence that it has the molecular function</span>: calcium ion binding. There is experimental evidence for 13 unique biological process<…	2	0.0129142	3.42151e-19		3primeCassette		370		altexon
FBgn0031245	CG3625	2L	291010	This gene is referred to in FlyBase by the symbol Dmel\CG3625 (CG3625, FBgn0031245). It is a protein_coding_gene from Drosophila melanogaster. Its sequence location is 2L:283385..291010. It has the cytological map location 21B7. Its molecular function is unknown. The biological processes in which it is involved are not known. 10 alleles are reported. No phenotypic data is available. It has 3 anno…	3	0.0132989	1	5primeCassette		198			altexon
FBgn0259481	Mob2	3L	11555333	The gene Mob2 is referred to in FlyBase by the symbol Dmel\Mob2 (CG11711, FBgn0259481). It is a protein_coding_gene from Drosophila melanogaster. Its sequence location is 3L:11515857..11555333. It has the cytological map location 68C12-68C13. There is experimental evidence that it has the molecular function</span>: protein binding. There is experimental evidence that it is involved in the biologi…	4	0.0142045	1.7963e-05	5primeCassette		283		362	altexon
FBgn0004924	Top1	X	15213525	The gene Topoisomerase 1 is referred to in FlyBase by the symbol Dmel\Top1 (CG6146, FBgn0004924). It is a protein_coding_gene from Drosophila melanogaster. Its sequence location is X:15213525..15222062. It has the cytological map location 13B6. There is experimental evidence that it has the molecular function</span>: DNA topoisomerase activity; DNA topoisomerase type I activity. There is experime…	2	0.0152077	1.51465e-15	5primeCassette	1498	316			altexon
FBgn0037317	CG14667	3R	1200792	This gene is referred to in FlyBase by the symbol Dmel\CG14667 (CG14667, FBgn0037317). It is a protein_coding_gene from Drosophila melanogaster. Its sequence location is 3R:1200792..1202183. It has the cytological map location 83A1. An electronic pipeline based on InterPro domains suggests that it has the molecular function</span>: zinc ion binding. The biological processes in which it is involve…	2	0.0154096	1.51134e-05						altexon
FBgn0039924	CG17471	4	1217466	This gene is referred to in FlyBase by the symbol Dmel\CG17471 (CG17471, FBgn0039924). It is a protein_coding_gene from Drosophila melanogaster. Its sequence location is 4:1213042..1217466. It has the cytological map location 102F8. Based on sequence similarity, it is predicted to have molecular function</span>: 1-phosphatidylinositol-4-phosphate 5-kinase activity. There is experimental evidence …	2	0.0156558	6.16725e-07						altexon
FBgn0004179	Csp	3L	22260361	The gene Cysteine string protein is referred to in FlyBase by the symbol Dmel\Csp (CG6395, FBgn0004179). It is a protein_coding_gene from Drosophila melanogaster. Its sequence location is 3L:22260361..22266846. It has the cytological map location 79D3. An electronic pipeline based on InterPro domains suggests that it has the molecular function</span>: heat shock protein binding; unfolded protein …	2	0.0156731	3.20979e-13					63	altexon
FBgn0052082	CG32082	3L	11129149	This gene is referred to in FlyBase by the symbol Dmel\CG32082 (CG32082, FBgn0052082). It is a protein_coding_gene from Drosophila melanogaster. Its sequence location is 3L:11129149..11156742. It has the cytological map location 68A8-68A9. Based on sequence similarity, it is predicted to have molecular function</span>: signal transducer activity. An electronic pipeline based on InterPro domains s…	3	0.0168017	1.4495e-15		83			1374	altexon
FBgn0046874	Pif1B	3R	4618269	The gene PFTAIRE-interacting factor 1B is referred to in FlyBase by the symbol Dmel\Pif1B (CG33720, FBgn0046874). It is a protein_coding_gene from Drosophila melanogaster. Its sequence location is 3R:4600008..4618269. It has the cytological map location 85B1. There is experimental evidence that it has the molecular function</span>: protein binding. The biological processes in which it is involved…	2	0.0172249	8.1774e-143	5primeCassette		106			altexon
FBgn0022160	Gpo-1	2R	11750251	The gene Glycerophosphate oxidase-1 is referred to in FlyBase by the symbol Dmel\Gpo-1 (CG8256, FBgn0022160). It is a protein_coding_gene from Drosophila melanogaster. Its sequence location is 2R:11745256..11750251. It has the cytological map location 52C8. There is experimental evidence that it has the molecular function</span>: glycerol-3-phosphate dehydrogenase activity. There is experimental …	4	0.0173135	1.43629e-29	5primeCassette		64		284
FBgn0030808	RhoGAP15B	X	16842895	The gene RhoGAP15B is referred to in FlyBase by the symbol Dmel\RhoGAP15B (CG4937, FBgn0030808). It is a protein_coding_gene from Drosophila melanogaster. Its sequence location is X:16842895..16850031. It has the cytological map location 15C4. Based on sequence similarity, it is predicted to have molecular function</span>: small GTPase regulator activity. An electronic pipeline based on InterPro …	2	0.0174049	0.00579833						altexon
FBgn0013981	His4r	3R	10451461	The gene Histone H4 replacement is referred to in FlyBase by the symbol Dmel\His4r (CG3379, FBgn0013981). It is a protein_coding_gene from Drosophila melanogaster. Its sequence location is 3R:10451461..10452336. It has the cytological map location 88C9. It is reported to have molecular function</span>: DNA binding. It is reported to be involved in the biological process</span>: chromatin assembly…	3	0.0193357	7.87907e-57	5primeCassette		116			altexon
FBgn0027341	Gfat1	3RHet	2470208	The gene Glutamine:fructose-6-phosphate aminotransferase 1 is referred to in FlyBase by the symbol Dmel\Gfat1 (CG12449, FBgn0027341). It is a protein_coding_gene from Drosophila melanogaster. Its sequence location is 3RHet:2470208..2481648. It has the cytological map location 81F. Based on sequence similarity, it is predicted to have molecular function</span>: glutamine-fructose-6-phosphate trans…	4	0.0193699	3.37386e-22					24
FBgn0050021	skf	2R	7120056	The gene skiff is referred to in FlyBase by the symbol Dmel\skf (CG30021, FBgn0050021). It is a protein_coding_gene from Drosophila melanogaster. Its sequence location is 2R:7113962..7120056. It has the cytological map location 47E1. Based on sequence similarity, it is predicted to have molecular function</span>: guanylate kinase activity. The biological processes in which it is involved are not …	2	0.0195051	1.00142e-08					30	altexon
FBgn0035227	CG12090	3L	1534034	This gene is referred to in FlyBase by the symbol Dmel\CG12090 (CG12090, FBgn0035227). It is a protein_coding_gene from Drosophila melanogaster. Its sequence location is 3L:1523412..1534034. It has the cytological map location 62A3. Its molecular function is unknown. The biological processes in which it is involved are not known. 2 alleles are reported. No phenotypic data is available. It has 3 a…	2	0.0196941	1					123
FBgn0020367	Vha68-2	2L	12974322	The gene Vha68-2 is referred to in FlyBase by the symbol Dmel\Vha68-2 (CG3762, FBgn0020367). It is a protein_coding_gene from Drosophila melanogaster. Its sequence location is 2L:12974322..12978615. It has the cytological map location 34A3. Based on sequence similarity, it is predicted to have molecular function</span>: hydrogen-exporting ATPase activity, phosphorylative mechanism. An electronic …	2	0.019728	2.33476e-219	63	6				altexon
FBgn0086604	CG12484	2R	16311840	This gene is referred to in FlyBase by the symbol Dmel\CG12484 (CG12484, FBgn0086604). It is a protein_coding_gene from Drosophila melanogaster. Its sequence location is 2R:16311840..16366459. It has the cytological map location 57A3. Its molecular function is unknown. The biological processes in which it is involved are not known. 12 alleles are reported. No phenotypic data is available. It has …	2	0.0197762	0.710524		3primeCassette		1071	21	altexon
FBgn0085434	NaCP60E	2R	20779163	The gene Na channel protein 60E is referred to in FlyBase by the symbol Dmel\NaCP60E (CG34405, FBgn0085434). It is a protein_coding_gene from Drosophila melanogaster. Its sequence location is 2R:20779163..20807788. It has the cytological map location 60E5. Based on sequence similarity, it is predicted to have molecular function</span>: voltage-gated sodium channel activity. There is experimental …	2	0.0203466	1.48639e-08						altexon
FBgn0004873	hts	2R	15312454	The gene hu li tai shao is referred to in FlyBase by the symbol Dmel\hts (CG9325, FBgn0004873). It is a protein_coding_gene from Drosophila melanogaster. Its sequence location is 2R:15284840..15312454. It has the cytological map location 56D3-56D5. Based on sequence similarity, it is predicted to have molecular function</span>: actin binding. There is experimental evidence that it is involved in …	5	0.0212928	1	3	3primeCassette		1465		altexon
FBgn0020439	fau	3R	6603090	The gene fau is referred to in FlyBase by the symbol Dmel\fau (CG6544, FBgn0020439). It is a protein_coding_gene from Drosophila melanogaster. Its sequence location is 3R:6593888..6603090. It has the cytological map location 86C6. Its molecular function is unknown. The biological processes in which it is involved are not known. 4 alleles are reported. No phenotypic data is available. It has 5 ann…	3	0.0219371	0.0126615		3primeCassette		871		altexon
FBgn0005630	lola	2R	6430767	The gene longitudinals lacking is referred to in FlyBase by the symbol Dmel\lola (CG12052, FBgn0005630). It is a protein_coding_gene from Drosophila melanogaster. Its sequence location is 2R:6369712..6430767. It has the cytological map location 47A11-47A13. There is experimental evidence that it has the molecular function</span>: protein binding. There is experimental evidence for 12 unique biolo…	16	0.0231006	5.2454e-19		3primeCassette		1030		altexon
FBgn0041203	LIMK1	X	12486226	The gene LIM-kinase1 is referred to in FlyBase by the symbol Dmel\LIMK1 (CG1848, FBgn0041203). It is a protein_coding_gene from Drosophila melanogaster. Its sequence location is X:12478418..12486226. It has the cytological map location 11B2. There is experimental evidence that it has the molecular function</span>: protein serine/threonine kinase activity. There is experimental evidence that it is…	4	0.0273439	2.56259e-22	5primeCassette	560	160		93	altexon
FBgn0031836	CG11050	2L	6611023	This gene is referred to in FlyBase by the symbol Dmel\CG11050 (CG11050, FBgn0031836). It is a protein_coding_gene from Drosophila melanogaster. Its sequence location is 2L:6611023..6617064. It has the cytological map location 26F1. An electronic pipeline based on InterPro domains suggests that it has the molecular function</span>: catalytic activity. The biological processes in which it is invol…	3	0.0276915	0.000213158	5primeCassette		246			altexon
FBgn0017397	how	3R	17867914	The gene held out wings is referred to in FlyBase by the symbol Dmel\how (CG10293, FBgn0017397). It is a protein_coding_gene from Drosophila melanogaster. Its sequence location is 3R:17867914..17905043. It has the cytological map location 94A1. There is experimental evidence that it has the molecular function</span>: mRNA 3'-UTR binding; mRNA binding. There is experimental evidence that it is inv…	4	0.0279761	0.00487288		858				altexon
FBgn0031401	CG7082	2L	2220767	This gene is referred to in FlyBase by the symbol Dmel\CG7082 (CG7082, FBgn0031401). It is a protein_coding_gene from Drosophila melanogaster. Its sequence location is 2L:2220767..2225555. It has the cytological map location 22D4. An electronic pipeline based on InterPro domains suggests that it has the molecular function</span>: RNA binding. The biological processes in which it is involved are n…	3	0.0316767	2.12597e-38	5primeCassette		185			altexon
FBgn0003071	Pfk	2R	5997245	The gene Phosphofructokinase is referred to in FlyBase by the symbol Dmel\Pfk (CG4001, FBgn0003071). It is a protein_coding_gene from Drosophila melanogaster. Its sequence location is 2R:5997245..6004696. It has the cytological map location 46E8-46F1. There is experimental evidence that it has the molecular function</span>: 6-phosphofructokinase activity. There is experimental evidence that it is…	2	0.0317564	1					109
FBgn0003178	PyK	3R	18193234	The gene Pyruvate kinase is referred to in FlyBase by the symbol Dmel\PyK (CG7070, FBgn0003178). It is a protein_coding_gene from Drosophila melanogaster. Its sequence location is 3R:18193234..18198464. It has the cytological map location 94A6. There is experimental evidence that it has the molecular function</span>: pyruvate kinase activity. Based on sequence similarity, it is predicted to be in…	2	0.0319092	4.28944e-30	5primeCassette	7	157			altexon
FBgn0261800	LanB1	2L	7811440	The gene LanB1 is referred to in FlyBase by the symbol Dmel\LanB1 (CG7123, FBgn0261800). It is a protein_coding_gene from Drosophila melanogaster. Its sequence location is 2L:7811440..7820774. It has the cytological map location 28C4-28D1. Its molecular function is unknown. There is experimental evidence that it is involved in the biological process</span>: organ development; cell migration; base…	2	0.0324899	1	5primeCassette		333			altexon
FBgn0039936	CG11148	4	887652	This gene is referred to in FlyBase by the symbol Dmel\CG11148 (CG11148, FBgn0039936). It is a protein_coding_gene from Drosophila melanogaster. Its sequence location is 4:876026..887652. It has the cytological map location 102E5. Its molecular function is unknown. The biological processes in which it is involved are not known. 5 alleles are reported. No phenotypic data is available. It has 5 ann…	2	0.0345831	1.31508e-10						altexon
FBgn0259246	brp	2R	5391293	The gene bruchpilot is referred to in FlyBase by the symbol Dmel\brp (CG42344, FBgn0259246). It is a protein_coding_gene from Drosophila melanogaster. Its sequence location is 2R:5391293..5424980. It has the cytological map location 45E3-45F1. There is experimental evidence that it has the molecular function</span>: calcium channel activity. There is experimental evidence that it is involved in t…	4	0.0353835	3.84663e-43	5primeCassette	3primeCassette	58	337		altexon
FBgn0034649	CG9865	2R	17557560	This gene is referred to in FlyBase by the symbol Dmel\CG9865 (CG9865, FBgn0034649). It is a protein_coding_gene from Drosophila melanogaster. Its sequence location is 2R:17555046..17557560. It has the cytological map location 57F7. An electronic pipeline based on InterPro domains suggests that it has the molecular function</span>: transferase activity, transferring hexosyl groups. An electronic …	2	0.0359202	3.98055e-17	140					altexon
FBgn0002909	mus312	3L	7322231	The gene mutagen-sensitive 312 is referred to in FlyBase by the symbol Dmel\mus312 (CG8601, FBgn0002909). It is a protein_coding_gene from Drosophila melanogaster. Its sequence location is 3L:7322231..7326571. It has the cytological map location 65F4-65F5. There is experimental evidence that it has the molecular function</span>: protein binding. There is experimental evidence that it is involved …	2	0.0365191	1						altexon
FBgn0002576	lz	X	9178682	The gene lozenge is referred to in FlyBase by the symbol Dmel\lz (CG1689, FBgn0002576). It is a protein_coding_gene from Drosophila melanogaster. Its sequence location is X:9178682..9197670. It has the cytological map location 8D5-8D6. There is experimental evidence that it has the molecular function</span>: sequence-specific DNA binding; RNA polymerase II transcription factor activity; DNA bindi…	2	0.0376398	1					363
FBgn0028993	scro	3LHet	207493	The gene scarecrow is referred to in FlyBase by the symbol Dmel\scro (CG17594, FBgn0028993). It is a protein_coding_gene from Drosophila melanogaster. Its sequence location is 3LHet:207493..252455. Based on sequence similarity, it is predicted to have molecular function</span>: transcription factor activity; DNA binding. Based on sequence similarity, it is predicted to be involved in the biologic…	3	0.0387475	1.63893e-08					87
FBgn0041210	HDAC4	X	13179354	The gene HDAC4 is referred to in FlyBase by the symbol Dmel\HDAC4 (CG1770, FBgn0041210). It is a protein_coding_gene from Drosophila melanogaster. Its sequence location is X:13156922..13179354. It has the cytological map location 11E8-11E9. There is experimental evidence that it has the molecular function</span>: histone deacetylase activity. There is experimental evidence that it is involved in …	3	0.0389698	2.1996e-40	5primeCassette		119			altexon
FBgn0051092	LpR2	3R	21566187	The gene LpR2 is referred to in FlyBase by the symbol Dmel\LpR2 (CG31092, FBgn0051092). It is a protein_coding_gene from Drosophila melanogaster. Its sequence location is 3R:21524488..21566187. It has the cytological map location 96E10-96F1. Based on sequence similarity, it is predicted to have molecular function</span>: low-density lipoprotein receptor activity. The biological processes in which…	2	0.0405621	1	5primeCassette		221		123	altexon
FBgn0032775	CG17544	2L	19398492	This gene is referred to in FlyBase by the symbol Dmel\CG17544 (CG17544, FBgn0032775). It is a protein_coding_gene from Drosophila melanogaster. Its sequence location is 2L:19390369..19398492. It has the cytological map location 37D4-37D5. Based on sequence similarity, it is predicted to have molecular function</span>: pristanoyl-CoA oxidase activity. An electronic pipeline based on InterPro doma…	2	0.042033	1	5primeCassette	1	146			altexon
FBgn0037525	CG17816	3R	3712441	This gene is referred to in FlyBase by the symbol Dmel\CG17816 (CG17816, FBgn0037525). It is a protein_coding_gene from Drosophila melanogaster. Its sequence location is 3R:3683896..3712441. It has the cytological map location 84E3-84E4. Its molecular function is unknown. The biological processes in which it is involved are not known. 4 alleles are reported. No phenotypic data is available. It ha…	4	0.0429375	2.36577e-06		3primeCassette		275		altexon
FBgn0030089	AP-1gamma	X	9002726	The gene AP-1Î³ is referred to in FlyBase by the symbol Dmel\AP-1Î³ (CG9113, FBgn0030089). It is a protein_coding_gene from Drosophila melanogaster. Its sequence location is X:9002726..9011773. It has the cytological map location 8C9-8C10. An electronic pipeline based on InterPro domains suggests that it has the molecular function</span>: protein binding; protein transporter activity. It is repor…	3	0.0444716	1					18	altexon
FBgn0026611	AGO1	2R	9845594	The gene Argonaute-1 is referred to in FlyBase by the symbol Dmel\AGO1 (CG6671, FBgn0026611). It is a protein_coding_gene from Drosophila melanogaster. Its sequence location is 2R:9834047..9845594. It has the cytological map location 50C9-50C17. There is experimental evidence that it has the molecular function</span>: enzyme binding; protein binding; miRNA binding. There is experimental evidence …	2	0.0447675	9.0138e-16	5primeCassette		128		227	altexon
FBgn0010256	Rbp2	X	16342710	The gene RNA-binding protein 2 is referred to in FlyBase by the symbol Dmel\Rbp2 (CG4429, FBgn0010256). It is a protein_coding_gene from Drosophila melanogaster. Its sequence location is X:16342710..16347648. It has the cytological map location 14C6-14C8. Based on sequence similarity, it is predicted to have molecular function</span>: mRNA binding; translation initiation factor activity. Based on…	2	0.0467107	8.9017e-13						altexon
FBgn0032135	GlcAT-S	2L	9616469	The gene GlcAT-S is referred to in FlyBase by the symbol Dmel\GlcAT-S (CG3881, FBgn0032135). It is a protein_coding_gene from Drosophila melanogaster. Its sequence location is 2L:9616469..9623109. It has the cytological map location 30C1. There is experimental evidence that it has the molecular function</span>: asioloorosomucoid beta-1,3-glucuronosyltransferase activity; galactosylgalactosylxylos…	2	0.047106	4.52888e-31	5primeCassette		45			altexon
FBgn0085436	Not1	2R	5465985	The gene Not1 is referred to in FlyBase by the symbol Dmel\Not1 (CG34407, FBgn0085436). It is a protein_coding_gene from Drosophila melanogaster. Its sequence location is 2R:5455019..5465985. It has the cytological map location 45F4. Based on sequence similarity, it is predicted to have molecular function</span>: basal transcription repressor activity. There is experimental evidence that it is in…	2	0.047535	1	5primeCassette		296		286
FBgn0005410	sno	X	13105699	The gene strawberry notch is referred to in FlyBase by the symbol Dmel\sno (CG1903, FBgn0005410). It is a protein_coding_gene from Drosophila melanogaster. Its sequence location is X:13089532..13105699. It has the cytological map location 11E3. An electronic pipeline based on InterPro domains suggests that it has the molecular function</span>: ATP binding; nucleic acid binding; helicase activity.…	3	0.047569	6.65474e-20					540
FBgn0027596	CG10249	2R	10804873	This gene is referred to in FlyBase by the symbol Dmel\CG10249 (CG10249, FBgn0027596). It is a protein_coding_gene from Drosophila melanogaster. Its sequence location is 2R:10788980..10804873. It has the cytological map location 51D2. Its molecular function is unknown. The biological processes in which it is involved are not known. 3 alleles are reported. No phenotypic data is available. It has 5…	3	0.0485354	6.8787e-08	5primeCassette		209			altexon
FBgn0028572	qtc	2L	5060832	The gene quick-to-court is referred to in FlyBase by the symbol Dmel\qtc (CG14039, FBgn0028572). It is a protein_coding_gene from Drosophila melanogaster. Its sequence location is 2L:5060832..5070750. It has the cytological map location 25C3-25C4. Its molecular function is unknown. There is experimental evidence that it is involved in the biological process</span>: male courtship behavior. 12 all…	3	0.0505547	1.07133e-125					93
FBgn0037339	Pi4KIIalpha	3R	1389347	The gene Pi4KIIÎ± is referred to in FlyBase by the symbol Dmel\Pi4KIIÎ± (CG2929, FBgn0037339). It is a protein_coding_gene from Drosophila melanogaster. Its sequence location is 3R:1383385..1389347. It has the cytological map location 83B1-83B2. There is experimental evidence that it has the molecular function</span>: 1-phosphatidylinositol 4-kinase activity. There is experimental evidence that i…	3	0.0506319	3.01037e-31		3primeCassette		639		altexon
FBgn0015286	Rala	X	3613665	The gene Ras-related protein is referred to in FlyBase by the symbol Dmel\Rala (CG2849, FBgn0015286). It is a protein_coding_gene from Drosophila melanogaster. Its sequence location is X:3599017..3613665. It has the cytological map location 3E5-3E6. Based on sequence similarity, it is predicted to have molecular function</span>: GTPase activity. There is experimental evidence that it is involved …	3	0.0533359	0.544706					196
FBgn0010352	Nc73EF	3L	16948605	The gene Neural conserved at 73EF is referred to in FlyBase by the symbol Dmel\Nc73EF (CG11661, FBgn0010352). It is a protein_coding_gene from Drosophila melanogaster. Its sequence location is 3L:16948605..16961180. It has the cytological map location 73E1. Based on sequence similarity, it is predicted to have molecular function</span>: oxoglutarate dehydrogenase (succinyl-transferring) activity.…	5	0.0537286	2.03287e-52	5primeCassette		38		130	altexon
FBgn0020238	14-3-3epsilon	3R	14068253	The gene 14-3-3Îµ is referred to in FlyBase by the symbol Dmel\14-3-3Îµ (CG31196, FBgn0020238). It is a protein_coding_gene from Drosophila melanogaster. Its sequence location is 3R:14068253..14074388. It has the cytological map location 90F10. It is reported to have molecular function</span>: protein kinase C inhibitor activity. There is experimental evidence that it is involved in the biologica…	4	0.0574858	1						altexon
FBgn0000634	Fas1	3R	12450948	The gene Fasciclin 1 is referred to in FlyBase by the symbol Dmel\Fas1 (CG6588, FBgn0000634). It is a protein_coding_gene from Drosophila melanogaster. Its sequence location is 3R:12450948..12465493. It has the cytological map location 89D5-89D6. There is experimental evidence that it has the molecular function</span>: cell adhesion molecule binding. There is experimental evidence that it is invo…	5	0.0576862	7.82427e-256					39
FBgn0029896	CG3168	X	6634019	This gene is referred to in FlyBase by the symbol Dmel\CG3168 (CG3168, FBgn0029896). It is a protein_coding_gene from Drosophila melanogaster. Its sequence location is X:6614508..6634019. It has the cytological map location 6C9-6C10. An electronic pipeline based on InterPro domains suggests that it has the molecular function</span>: transporter activity. An electronic pipeline based on InterPro d…	3	0.0587709	1.89553e-55	5primeCassette		497		178
FBgn0027548	nito	2R	3849991	The gene spenito is referred to in FlyBase by the symbol Dmel\nito (CG2910, FBgn0027548). It is a protein_coding_gene from Drosophila melanogaster. Its sequence location is 2R:3849991..3857320. It has the cytological map location 43F8-43F9. Based on sequence similarity, it is predicted to have molecular function</span>: mRNA binding. It is reported to be involved in the biological process</span>:…	2	0.0588217	2.05962e-08		3primeCassette		226		altexon
FBgn0085432	pan	4	89956	The gene pangolin is referred to in FlyBase by the symbol Dmel\pan (CG34403, FBgn0085432). It is a protein_coding_gene from Drosophila melanogaster. Its sequence location is 4:89956..129430. It has the cytological map location 102A3-102A4. There is experimental evidence that it has the molecular function</span>: specific transcriptional repressor activity. There is experimental evidence that it i…	5	0.0620858	6.23053e-36	3				154	altexon
FBgn0030329	prtp	X	11610821	The gene pretaporter is referred to in FlyBase by the symbol Dmel\prtp (CG1837, FBgn0030329). It is a protein_coding_gene from Drosophila melanogaster. Its sequence location is X:11610821..11613927. It has the cytological map location 10D7. Based on sequence similarity, it is predicted to have molecular function</span>: protein disulfide isomerase activity. There is experimental evidence that it …	2	0.0658376	0.785585	5primeCassette		27			altexon
FBgn0024753	Flo-2	X	14733411	The gene flotillin 2 is referred to in FlyBase by the symbol Dmel\Flo-2 (CG32593, FBgn0024753). It is a protein_coding_gene from Drosophila melanogaster. Its sequence location is X:14733411..14827616. It has the cytological map location 12F5-13A1. There is experimental evidence that it has the molecular function</span>: structural molecule activity. It is reported to be involved in the biological…	4	0.0703407	1	5primeCassette		454			altexon
FBgn0031883	CG11266	2L	7032713	This gene is referred to in FlyBase by the symbol Dmel\CG11266 (CG11266, FBgn0031883). It is a protein_coding_gene from Drosophila melanogaster. Its sequence location is 2L:7032713..7037620. It has the cytological map location 27D5. Based on sequence similarity, it is predicted to have molecular function</span>: mRNA binding. There is experimental evidence that it is involved in the biological pr…	4	0.0709877	3.89329e-55	13					altexon
FBgn0024807	DIP1	X	21501185	The gene DISCO Interacting Protein 1 is referred to in FlyBase by the symbol Dmel\DIP1 (CG17686, FBgn0024807). It is a protein_coding_gene from Drosophila melanogaster. Its sequence location is X:21495823..21501185. It has the cytological map location 20A4-20A5. There is experimental evidence that it has the molecular function</span>: double-stranded RNA binding; protein binding. The biological p…	5	0.0767312	2.23792e-45						altexon
FBgn0061356	CG18003	2R	6767458	This gene is referred to in FlyBase by the symbol Dmel\CG18003 (CG18003, FBgn0061356). It is a protein_coding_gene from Drosophila melanogaster. Its sequence location is 2R:6767458..6772441. It has the cytological map location 47C5. Based on sequence similarity, it is predicted to have molecular function</span>: glycolate oxidase activity. An electronic pipeline based on InterPro domains suggests…	2	0.0789385	7.0862e-21	5primeCassette	45	81			altexon
FBgn0261855	CG42784	2L	13475160	This gene is referred to in FlyBase by the symbol Dmel\CG42784 (CG42784, FBgn0261855). It is a protein_coding_gene from Drosophila melanogaster. Its sequence location is 2L:13475160..13500427. It has the cytological map location 34C3. Its molecular function is unknown. The biological processes in which it is involved are not known. 2 alleles are reported. No phenotypic data is available. It has 3…	3	0.0808384	0.000776709	5primeCassette		1274		48	altexon
FBgn0038246	CG14853	3R	10435371	This gene is referred to in FlyBase by the symbol Dmel\CG14853 (CG14853, FBgn0038246). It is a protein_coding_gene from Drosophila melanogaster. Its sequence location is 3R:10435371..10444709. It has the cytological map location 88C9. Its molecular function is unknown. The biological processes in which it is involved are not known. 6 alleles are reported. No phenotypic data is available. It has 2…	2	0.0822783	0.0260238	5primeCassette		459			altexon
FBgn0016038	mod(r)	X	515569	The gene modifier of rudimentary is referred to in FlyBase by the symbol Dmel\mod(r) (CG17828, FBgn0016038). It is a protein_coding_gene from Drosophila melanogaster. Its sequence location is X:515569..517081. It has the cytological map location 1B12. Its molecular function is unknown. The biological processes in which it is involved are not known. 7 alleles are reported. The phenotype of these a…	2	0.0838869	2.22045e-16	5primeCassette	115	262			altexon
FBgn0261698	CG42732	2R	6304469	This gene is referred to in FlyBase by the symbol Dmel\CG42732 (CG42732, FBgn0261698). It is a protein_coding_gene from Drosophila melanogaster. Its sequence location is 2R:6211164..6304469. It has the cytological map location 47A1-47A7. Based on sequence similarity, it is predicted to have molecular function</span>: potassium channel activity. An electronic pipeline based on InterPro domains sug…	3	0.0857901	0.00212534	5primeCassette		70		129	altexon
FBgn0003862	trx	3R	10112623	The gene trithorax is referred to in FlyBase by the symbol Dmel\trx (CG8651, FBgn0003862). It is a protein_coding_gene from Drosophila melanogaster. Its sequence location is 3R:10089080..10112623. It has the cytological map location 88B1. There is experimental evidence that it has the molecular function</span>: sequence-specific DNA binding. There is experimental evidence that it is involved in t…	2	0.0872969	6.11734e-37					1237
FBgn0038720	CG6231	3R	15458440	This gene is referred to in FlyBase by the symbol Dmel\CG6231 (CG6231, FBgn0038720). It is a protein_coding_gene from Drosophila melanogaster. Its sequence location is 3R:15441746..15458440. It has the cytological map location 92A10-92A11. Based on sequence similarity, it is predicted to have molecular function</span>: secondary active organic cation transmembrane transporter activity. An electro…	3	0.0885791	1	5primeCassette		385			altexon
FBgn0259743	RhoGEF3	3L	290727	This gene is referred to in FlyBase by the symbol Dmel\RhoGEF3 (CG42378, FBgn0259743). It is a protein_coding_gene from Drosophila melanogaster. Its sequence location is 3L:290727..305292. It has the cytological map location 61B3-61C1. It is reported to have molecular function</span>: signal transducer activity; Rho guanyl-nucleotide exchange factor activity. An electronic pipeline based on Inter…	3	0.0893784	1.31748e-30	5primeCassette	1196	386			altexon
FBgn0039902	CG2177	4	334534	This gene is referred to in FlyBase by the symbol Dmel\CG2177 (CG2177, FBgn0039902). It is a protein_coding_gene from Drosophila melanogaster. Its sequence location is 4:331558..334534. It has the cytological map location 102B3. An electronic pipeline based on InterPro domains suggests that it has the molecular function</span>: metal ion transmembrane transporter activity. An electronic pipeline …	2	0.0893812	1	27					altexon
FBgn0027580	CG1516	2R	5757853	This gene is referred to in FlyBase by the symbol Dmel\CG1516 (CG1516, FBgn0027580). It is a protein_coding_gene from Drosophila melanogaster. Its sequence location is 2R:5738208..5757853. It has the cytological map location 46B4. Based on sequence similarity, it is predicted to have molecular function</span>: pyruvate carboxylase activity. Based on sequence similarity, it is predicted to be invo…	2	0.0909254	1						altexon
FBgn0024290	Slob	2L	7675078	The gene Slowpoke binding protein is referred to in FlyBase by the symbol Dmel\Slob (CG6772, FBgn0024290). It is a protein_coding_gene from Drosophila melanogaster. Its sequence location is 2L:7647053..7675078. It has the cytological map location 28C1. There is experimental evidence that it has the molecular function</span>: protein binding; protein kinase activity. There is experimental evidence…	3	0.0915054	0.00635551					51
FBgn0001987	Gli	2L	15762755	The gene Gliotactin is referred to in FlyBase by the symbol Dmel\Gli (CG3903, FBgn0001987). It is a protein_coding_gene from Drosophila melanogaster. Its sequence location is 2L:15756001..15762755. It has the cytological map location 35D4. Based on sequence similarity, it is predicted to have molecular function</span>: carboxylesterase activity. There is experimental evidence that it is involved …	2	0.0935536	1						altexon
FBgn0082598	akirin	3L	7362900	The gene akirin is referred to in FlyBase by the symbol Dmel\akirin (CG8580, FBgn0082598). It is a protein_coding_gene from Drosophila melanogaster. Its sequence location is 3L:7362900..7366958. It has the cytological map location 65F7. There is experimental evidence that it has the molecular function</span>: protein binding. There is experimental evidence that it is involved in the biological pr…	2	0.101362	5.21232e-20		235				altexon
FBgn0020621	Pkn	2R	5172602	The gene Protein kinase related to protein kinase N is referred to in FlyBase by the symbol Dmel\Pkn (CG2049, FBgn0020621). It is a protein_coding_gene from Drosophila melanogaster. Its sequence location is 2R:5139815..5172602. It has the cytological map location 45C1. There is experimental evidence that it has the molecular function</span>: protein kinase activity. There is experimental evidence…	6	0.102286	2.54299e-104	5primeCassette	1526	139		373	altexon
FBgn0001624	dlg1	X	11263670	The gene discs large 1 is referred to in FlyBase by the symbol Dmel\dlg1 (CG1725, FBgn0001624). It is a protein_coding_gene from Drosophila melanogaster. Its sequence location is X:11263670..11301784. It has the cytological map location 10B6-10B10. There is experimental evidence that it has the molecular function</span>: protein binding. There is experimental evidence for 15 unique biological pro…	6	0.104759	3.63372e-45	5primeCassette		88		24	altexon
FBgn0261444	CG3638	X	1130666	This gene is referred to in FlyBase by the symbol Dmel\CG3638 (CG3638, FBgn0261444). It is a protein_coding_gene from Drosophila melanogaster. Its sequence location is X:1111116..1130666. It has the cytological map location 1E4-1E5. Its molecular function is unknown. There is experimental evidence that it is involved in the biological process</span>: inter-male aggressive behavior; mushroom body …	2	0.108006	7.92879e-21	5primeCassette		189		300	altexon
FBgn0004435	Galpha49B	2R	8500246	The gene G protein Î±49B is referred to in FlyBase by the symbol Dmel\GÎ±49B (CG17759, FBgn0004435). It is a protein_coding_gene from Drosophila melanogaster. Its sequence location is 2R:8500246..8507806. It has the cytological map location 49B8-49B9. There is experimental evidence that it has the molecular function</span>: GTPase activity. There is experimental evidence that it is involved in th…	3	0.109027	1	12					altexon
FBgn0033853	CG6145	2R	9435082	This gene is referred to in FlyBase by the symbol Dmel\CG6145 (CG6145, FBgn0033853). It is a protein_coding_gene from Drosophila melanogaster. Its sequence location is 2R:9424893..9435082. It has the cytological map location 50B1. An electronic pipeline based on InterPro domains suggests that it has the molecular function</span>: NAD+ kinase activity. An electronic pipeline based on InterPro doma…	3	0.109341	9.83022e-36	5primeCassette		135			altexon
FBgn0004595	pros	3R	7197709	The gene prospero is referred to in FlyBase by the symbol Dmel\pros (CG17228, FBgn0004595). It is a protein_coding_gene from Drosophila melanogaster. Its sequence location is 3R:7197709..7219326. It has the cytological map location 86E2-86E4. There is experimental evidence that it has the molecular function</span>: transcription factor activity; specific transcriptional repressor activity; DNA bi…	3	0.109463	0.000245211						altexon
FBgn0000259	CkIIbeta	X	11686569	The gene Casein kinase II Î² subunit is referred to in FlyBase by the symbol Dmel\CkIIÎ² (CG15224, FBgn0000259). It is a protein_coding_gene from Drosophila melanogaster. Its sequence location is X:11686569..11694097. It has the cytological map location 10E3. There is experimental evidence that it has the molecular function</span>: protein serine/threonine kinase activity; protein kinase regulato…	3	0.112404	0.00416958		3primeCassette		72		altexon
FBgn0001316	klar	3L	540589	The gene klarsicht is referred to in FlyBase by the symbol Dmel\klar (CG17046, FBgn0001316). It is a protein_coding_gene from Drosophila melanogaster. Its sequence location is 3L:434258..540589. It has the cytological map location 61C1-61C3. There is experimental evidence that it has the molecular function</span>: protein binding. There is experimental evidence that it is involved in the biologic…	4	0.118228	4.24421e-06	385	21			651	altexon
FBgn0038108	CG7518	3R	8824307	This gene is referred to in FlyBase by the symbol Dmel\CG7518 (CG7518, FBgn0038108). It is a protein_coding_gene from Drosophila melanogaster. Its sequence location is 3R:8824307..8834126. It has the cytological map location 87D7-87D8. An electronic pipeline based on InterPro domains suggests that it has the molecular function</span>: DNA binding. The biological processes in which it is involved …	3	0.121698	1.97253e-06						altexon
FBgn0036702	CG6512	3L	17235223	This gene is referred to in FlyBase by the symbol Dmel\CG6512 (CG6512, FBgn0036702). It is a protein_coding_gene from Drosophila melanogaster. Its sequence location is 3L:17231717..17235223. It has the cytological map location 74A1-74A2. Based on sequence similarity, it is predicted to have molecular function</span>: metalloendopeptidase activity; ATPase activity. Based on sequence similarity, it…	2	0.133996	1.09374e-23	24					altexon
FBgn0015011	Ahcy89E	3R	12807905	The gene Adenosylhomocysteinase 89E is referred to in FlyBase by the symbol Dmel\Ahcy89E (CG8956, FBgn0015011). It is a protein_coding_gene from Drosophila melanogaster. Its sequence location is 3R:12804161..12807905. It has the cytological map location 89E5. Based on sequence similarity, it is predicted to have molecular function</span>: adenosylhomocysteinase activity. An electronic pipeline ba…	2	0.134821	1	151					altexon
FBgn0003371	sgg	X	2527983	The gene shaggy is referred to in FlyBase by the symbol Dmel\sgg (CG2621, FBgn0003371). It is a protein_coding_gene from Drosophila melanogaster. Its sequence location is X:2527983..2571879. It has the cytological map location 3A8-3B1. There is experimental evidence that it has the molecular function</span>: protein kinase activity; kinase activity. There is experimental evidence for 16 unique bi…	7	0.13744	3.27864e-18		3primeCassette		746	237	altexon
FBgn0000039	nAcRalpha-96Ab	3R	20311164	The gene nicotinic Acetylcholine Receptor alpha 96Ab is referred to in FlyBase by the symbol Dmel\nAcRÎ±-96Ab (CG6844, FBgn0000039). It is a protein_coding_gene from Drosophila melanogaster. Its sequence location is 3R:20311164..20316875. It has the cytological map location 96A3. Based on sequence similarity, it is predicted to have molecular function</span>: nicotinic acetylcholine-activated cat…	2	0.137577	1	95					altexon
FBgn0041111	lilli	2L	2885952	The gene lilliputian is referred to in FlyBase by the symbol Dmel\lilli (CG8817, FBgn0041111). It is a protein_coding_gene from Drosophila melanogaster. Its sequence location is 2L:2885952..2953077. It has the cytological map location 23C1-23C3. Based on sequence similarity, it is predicted to have molecular function</span>: transcription factor activity; DNA binding. There is experimental eviden…	4	0.139916	1.02891e-28	5primeCassette		627			altexon
FBgn0030362	regucalcin	X	11906467	The gene regucalcin is referred to in FlyBase by the symbol Dmel\regucalcin (CG1803, FBgn0030362). It is a protein_coding_gene from Drosophila melanogaster. Its sequence location is X:11906467..11911091. It has the cytological map location 11A1. Its molecular function is unknown. The biological processes in which it is involved are not known. 3 alleles are reported. No phenotypic data is availabl…	3	0.142427	0.00147827	5primeCassette		103			altexon
FBgn0020660	eIF-4B	2RHet	2901752	The gene Eukaryotic initiation factor 4B is referred to in FlyBase by the symbol Dmel\eIF-4B (CG10837, FBgn0020660). It is a protein_coding_gene from Drosophila melanogaster. Its sequence location is 2RHet:2901752..2917318. There is experimental evidence that it has the molecular function</span>: translation initiation factor activity. There is experimental evidence that it is involved in the bio…	3	0.144087	3.06451e-16		3primeCassette		68		altexon
FBgn0261551	CG42669	3L	2412088	This gene is referred to in FlyBase by the symbol Dmel\CG42669 (CG42669, FBgn0261551). It is a protein_coding_gene from Drosophila melanogaster. Its sequence location is 3L:2412088..2466353. It has the cytological map location 62E2. Its molecular function is unknown. The biological processes in which it is involved are not known. 22 alleles are reported. No phenotypic data is available. It has 12…	5	0.145575	3.1274e-13	5primeCassette	3primeCassette	127	384		altexon
FBgn0028863	CG4587	2L	15714237	This gene is referred to in FlyBase by the symbol Dmel\CG4587 (CG4587, FBgn0028863). It is a protein_coding_gene from Drosophila melanogaster. Its sequence location is 2L:15647835..15714237. It has the cytological map location 35D3. Based on sequence similarity, it is predicted to have molecular function</span>: voltage-gated calcium channel activity. The biological processes in which it is invol…	3	0.145621	1	5primeCassette		113			altexon
FBgn0010217	ATPsyn-beta	4	1052440	The gene ATP synthase-Î² is referred to in FlyBase by the symbol Dmel\ATPsyn-Î² (CG11154, FBgn0010217). It is a protein_coding_gene from Drosophila melanogaster. Its sequence location is 4:1052440..1055175. It has the cytological map location 102F6. Based on sequence similarity, it is predicted to have molecular function</span>: hydrogen-exporting ATPase activity, phosphorylative mechanism. Based…	2	0.145776	2.68416e-71		1014				altexon
FBgn0261625	CG42708	2R	8567094	This gene is referred to in FlyBase by the symbol Dmel\CG42708 (CG42708, FBgn0261625). It is a protein_coding_gene from Drosophila melanogaster. Its sequence location is 2R:8557988..8567094. It has the cytological map location 49B12. Based on sequence similarity, it is predicted to have molecular function</span>: glutaminase activity. Based on sequence similarity, it is predicted to be involved i…	5	0.156187	1		557				altexon
FBgn0039955	CG41099	3RHet	1706064	This gene is referred to in FlyBase by the symbol Dmel\CG41099 (CG41099, FBgn0039955). It is a protein_coding_gene from Drosophila melanogaster. Its sequence location is 3RHet:1685102..1706064. An electronic pipeline based on InterPro domains suggests that it has the molecular function</span>: protein binding; zinc ion binding. The biological processes in which it is involved are not known. No al…	2	0.16274	8.82982e-33	43	10				altexon
FBgn0032482	Pect	2L	13203768	The gene Phosphoethanolamine cytidylyltransferase is referred to in FlyBase by the symbol Dmel\Pect (CG5547, FBgn0032482). It is a protein_coding_gene from Drosophila melanogaster. Its sequence location is 2L:13203768..13210848. It has the cytological map location 34A9. Based on sequence similarity, it is predicted to have molecular function</span>: ethanolamine-phosphate cytidylyltransferase act…	2	0.189845	1	5primeCassette		505			altexon
FBgn0250818	CG34360	3R	5700403	This gene is referred to in FlyBase by the symbol Dmel\CG34360 (CG34360, FBgn0250818). It is a protein_coding_gene from Drosophila melanogaster. Its sequence location is 3R:5700403..5814598. It has the cytological map location 85F1-85F4. An electronic pipeline based on InterPro domains suggests that it has the molecular function</span>: zinc ion binding. The biological processes in which it is in…	5	0.196026	2.60495e-16		3primeCassette		1980	2747	altexon
FBgn0031995	CG8475	2L	8196893	This gene is referred to in FlyBase by the symbol Dmel\CG8475 (CG8475, FBgn0031995). It is a protein_coding_gene from Drosophila melanogaster. Its sequence location is 2L:8190954..8196893. It has the cytological map location 28F1. Based on sequence similarity, it is predicted to have molecular function</span>: phosphorylase kinase regulator activity. It is reported to be involved in the biologica…	2	0.197963	0.000378855						altexon
FBgn0085586	CG41265	2RHet	476025	This gene is referred to in FlyBase by the symbol Dmel\CG41265 (CG41265, FBgn0085586). It is a protein_coding_gene from Drosophila melanogaster. Its sequence location is 2RHet:476025..570571. Its molecular function is unknown. The biological processes in which it is involved are not known. No alleles are reported. It has 2 annotated transcripts and 2 annotated polypeptides.	2	0.202525	1	5primeCassette		107			altexon
FBgn0003429	slo	3R	20490086	The gene slowpoke is referred to in FlyBase by the symbol Dmel\slo (CG10693, FBgn0003429). It is a protein_coding_gene from Drosophila melanogaster. Its sequence location is 3R:20490086..20534111. It has the cytological map location 96A14-96A17. There is experimental evidence that it has the molecular function</span>: protein binding; calcium-activated potassium channel activity. There is experim…	4	0.20309	1		327			36	altexon
FBgn0033010	Atf6	2R	1032202	The gene Atf6 is referred to in FlyBase by the symbol Dmel\Atf6 (CG3136, FBgn0033010). It is a protein_coding_gene from Drosophila melanogaster. Its sequence location is 2R:1032202..1042266. It has the cytological map location 41D4-41E1. Based on sequence similarity, it is predicted to have molecular function</span>: protein homodimerization activity. An electronic pipeline based on InterPro doma…	3	0.205393	0.0665316	5primeCassette	573	162			altexon
FBgn0086911	rg	X	4979866	The gene rugose is referred to in FlyBase by the symbol Dmel\rg (CG6775, FBgn0086911). It is a protein_coding_gene from Drosophila melanogaster. Its sequence location is X:4979866..5145183. It has the cytological map location 4E2-4F3. There is experimental evidence that it has the molecular function</span>: protein kinase A binding. There is experimental evidence that it is involved in the biolog…	3	0.208085	1	5primeCassette		57		168	altexon
FBgn0037443	CG1021	3R	2231613	This gene is referred to in FlyBase by the symbol Dmel\CG1021 (CG1021, FBgn0037443). It is a protein_coding_gene from Drosophila melanogaster. Its sequence location is 3R:2214884..2231613. It has the cytological map location 83E5-83E6. Its molecular function is unknown. The biological processes in which it is involved are not known. 11 alleles are reported. No phenotypic data is available. It has…	3	0.213578	1						altexon
FBgn0002938	ninaC	2L	7377718	The gene neither inactivation nor afterpotential C is referred to in FlyBase by the symbol Dmel\ninaC (CG5125, FBgn0002938). It is a protein_coding_gene from Drosophila melanogaster. Its sequence location is 2L:7377718..7384344. It has the cytological map location 27F3. There is experimental evidence that it has the molecular function</span>: protein serine/threonine kinase activity; calmodulin b…	2	0.223114	1	18	3primeCassette		538		altexon
FBgn0037680	CG8121	3R	5160897	This gene is referred to in FlyBase by the symbol Dmel\CG8121 (CG8121, FBgn0037680). It is a protein_coding_gene from Drosophila melanogaster. Its sequence location is 3R:5160897..5162987. It has the cytological map location 85D11. Its molecular function is unknown. The biological processes in which it is involved are not known. 2 alleles are reported. No phenotypic data is available. It has 3 an…	3	0.224074	1						altexon
FBgn0000008	a	2R	18024494	The gene arc is referred to in FlyBase by the symbol Dmel\a (CG6741, FBgn0000008). It is a protein_coding_gene from Drosophila melanogaster. Its sequence location is 2R:18024494..18060346. It has the cytological map location 58C1-58C5. An electronic pipeline based on InterPro domains suggests that it has the molecular function</span>: protein binding. There is experimental evidence that it is inv…	2	0.229	1	5primeCassette	7	38			altexon
FBgn0067864	Patj	3L	1798809	The gene Patj is referred to in FlyBase by the symbol Dmel\Patj (CG12021, FBgn0067864). It is a protein_coding_gene from Drosophila melanogaster. Its sequence location is 3L:1798809..1802184. It has the cytological map location 62B4. An electronic pipeline based on InterPro domains suggests that it has the molecular function</span>: protein binding. There is experimental evidence that it is invol…	2	0.240686	1						altexon
FBgn0027598	CG31012	3R	26634349	This gene is referred to in FlyBase by the symbol Dmel\CG31012 (CG31012, FBgn0027598). It is a protein_coding_gene from Drosophila melanogaster. Its sequence location is 3R:26634349..26652542. It has the cytological map location 100A6. Based on sequence similarity, it is predicted to have molecular function</span>: SH3/SH2 adaptor activity. The biological processes in which it is involved are not…	2	0.245673	1	5primeCassette	3primeCassette	657	103		altexon
FBgn0035713	CG10107	3L	6745386	This gene is referred to in FlyBase by the symbol Dmel\CG10107 (CG10107, FBgn0035713). It is a protein_coding_gene from Drosophila melanogaster. Its sequence location is 3L:6737526..6745386. It has the cytological map location 65C3. Based on sequence similarity, it is predicted to have molecular function</span>: cysteine-type peptidase activity. It is reported to be involved in the biological pro…	2	0.252287	1	5primeCassette		142			altexon
FBgn0052549	CG32549	X	18304168	This gene is referred to in FlyBase by the symbol Dmel\CG32549 (CG32549, FBgn0052549). It is a protein_coding_gene from Drosophila melanogaster. Its sequence location is X:18284521..18304168. It has the cytological map location 17A10-17A11. Based on sequence similarity, it is predicted to have molecular function</span>: 5'-nucleotidase activity. Based on sequence similarity, it is predicted to be…	3	0.256371	1	5primeCassette		252			altexon
FBgn0027544	CG2217	3R	26248693	This gene is referred to in FlyBase by the symbol Dmel\CG2217 (CG2217, FBgn0027544). It is a protein_coding_gene from Drosophila melanogaster. Its sequence location is 3R:26244489..26248693. It has the cytological map location 99F3-99F4. Its molecular function is unknown. The biological processes in which it is involved are not known. 3 alleles are reported. No phenotypic data is available. It ha…	2	0.262437	1						altexon
FBgn0000479	dnc	X	3070475	The gene dunce is referred to in FlyBase by the symbol Dmel\dnc (CG32498, FBgn0000479). It is a protein_coding_gene from Drosophila melanogaster. Its sequence location is X:3070475..3233360. It has the cytological map location 3C9-3D1. Based on sequence similarity, it is predicted to have molecular function</span>: 3',5'-cyclic-AMP phosphodiesterase activity. There is experimental evidence that i…	8	0.263447	0.295134					39	altexon
FBgn0003149	Prm	3L	8738447	The gene Paramyosin is referred to in FlyBase by the symbol Dmel\Prm (CG5939, FBgn0003149). It is a protein_coding_gene from Drosophila melanogaster. Its sequence location is 3L:8725958..8738447. It has the cytological map location 66D12. Based on sequence similarity, it is predicted to have molecular function</span>: structural constituent of muscle. There is experimental evidence that it is inv…	2	0.266258	5.42447e-10	5primeCassette		385		108	altexon
FBgn0035772	Sh3beta	3L	7362357	The gene Sh3Î² is referred to in FlyBase by the symbol Dmel\Sh3Î² (CG8582, FBgn0035772). It is a protein_coding_gene from Drosophila melanogaster. Its sequence location is 3L:7357900..7362357. It has the cytological map location 65F7. Its molecular function is unknown. The biological processes in which it is involved are not known. 5 alleles are reported. No phenotypic data is available. It has 5…	4	0.26778	1.05765e-27		3primeCassette		863		altexon
FBgn0259685	crb	3R	20121138	The gene crumbs is referred to in FlyBase by the symbol Dmel\crb (CG6383, FBgn0259685). It is a protein_coding_gene from Drosophila melanogaster. Its sequence location is 3R:20121138..20140165. It has the cytological map location 95F10-95F11. Based on sequence similarity, it is predicted to have molecular function</span>: protein binding. There is experimental evidence for 20 unique biological pr…	2	0.272812	0.257331					129
FBgn0040384	CG32795	X	2683975	This gene is referred to in FlyBase by the symbol Dmel\CG32795 (CG32795, FBgn0040384). It is a protein_coding_gene from Drosophila melanogaster. Its sequence location is X:2676939..2683975. It has the cytological map location 3B6. Its molecular function is unknown. The biological processes in which it is involved are not known. 19 alleles are reported. The phenotype of these alleles is annotated …	3	0.284832	3.28071e-13						altexon
FBgn0039635	CG11876	3R	24938793	This gene is referred to in FlyBase by the symbol Dmel\CG11876 (CG11876, FBgn0039635). It is a protein_coding_gene from Drosophila melanogaster. Its sequence location is 3R:24938793..24941919. It has the cytological map location 98F10. Based on sequence similarity, it is predicted to have molecular function</span>: pyruvate dehydrogenase (acetyl-transferring) activity. There is experimental evide…	3	0.285973	6.79803e-15		3primeCassette		450	518	altexon
FBgn0044323	Cka	2L	8030723	The gene Connector of kinase to AP-1 is referred to in FlyBase by the symbol Dmel\Cka (CG7392, FBgn0044323). It is a protein_coding_gene from Drosophila melanogaster. Its sequence location is 2L:8030723..8038517. It has the cytological map location 28D3. There is experimental evidence that it has the molecular function</span>: protein binding. There is experimental evidence that it is involved in…	3	0.303697	1	5primeCassette		586			altexon
FBgn0259238	CG42336	2R	7185041	This gene is referred to in FlyBase by the symbol Dmel\CG42336 (CG42336, FBgn0259238). It is a protein_coding_gene from Drosophila melanogaster. Its sequence location is 2R:7182041..7185041. It has the cytological map location 47F1. Its molecular function is unknown. The biological processes in which it is involved are not known. 7 alleles are reported. No phenotypic data is available. It has 5 a…	2	0.308808	1					392
FBgn0000117	arm	X	1794673	The gene armadillo is referred to in FlyBase by the symbol Dmel\arm (CG11579, FBgn0000117). It is a protein_coding_gene from Drosophila melanogaster. Its sequence location is X:1785434..1794673. It has the cytological map location 2B14. There is experimental evidence that it has the molecular function</span>: transcription activator activity; protein binding; transcription coactivator activity. T…	3	0.327389	8.56484e-05	5primeCassette		131		230
FBgn0013995	Calx	3R	16803998	The gene Na/Ca-exchange protein is referred to in FlyBase by the symbol Dmel\Calx (CG5685, FBgn0013995). It is a protein_coding_gene from Drosophila melanogaster. Its sequence location is 3R:16803998..16840182. It has the cytological map location 93A4-93B3. There is experimental evidence that it has the molecular function</span>: calcium:sodium antiporter activity. There is experimental evidence …	2	0.327768	5.7911e-07	5primeCassette		845			altexon
FBgn0001218	Hsc70-3	X	11701212	The gene Heat shock protein cognate 3 is referred to in FlyBase by the symbol Dmel\Hsc70-3 (CG4147, FBgn0001218). It is a protein_coding_gene from Drosophila melanogaster. Its sequence location is X:11695729..11701212. It has the cytological map location 10E3-10E4. It is reported to have molecular function</span>: ATPase activity. There is experimental evidence that it is involved in the biologic…	3	0.341902	3.62341e-20	5primeCassette		311			altexon
FBgn0259232	CG42330	3L	8231747	This gene is referred to in FlyBase by the symbol Dmel\CG42330 (CG42330, FBgn0259232). It is a protein_coding_gene from Drosophila melanogaster. Its sequence location is 3L:8231747..8274251. It has the cytological map location 66C3-66C4. Its molecular function is unknown. The biological processes in which it is involved are not known. 9 alleles are reported. No phenotypic data is available. It ha…	2	0.358451	1						altexon
FBgn0017453	Zn72D	3L	16105488	The gene Zn72D is referred to in FlyBase by the symbol Dmel\Zn72D (CG5215, FBgn0017453). It is a protein_coding_gene from Drosophila melanogaster. Its sequence location is 3L:16099696..16105488. It has the cytological map location 72D6-72D7. Based on sequence similarity, it is predicted to have molecular function</span>: mRNA binding. There is experimental evidence that it is involved in the biol…	2	0.418461	1					203
FBgn0034230	CG4853	2R	13401710	This gene is referred to in FlyBase by the symbol Dmel\CG4853 (CG4853, FBgn0034230). It is a protein_coding_gene from Drosophila melanogaster. Its sequence location is 2R:13401710..13404950. It has the cytological map location 54C1. Based on sequence similarity, it is predicted to have molecular function</span>: deoxyribonuclease activity; Ras guanyl-nucleotide exchange factor activity. There is …	2	0.425479	0.0141108	45					altexon
FBgn0033356	CG8229	2R	4838609	This gene is referred to in FlyBase by the symbol Dmel\CG8229 (CG8229, FBgn0033356). It is a protein_coding_gene from Drosophila melanogaster. Its sequence location is 2R:4835618..4838609. It has the cytological map location 44F11. Its molecular function is unknown. The biological processes in which it is involved are not known. 3 alleles are reported. No phenotypic data is available. It has 2 an…	2	0.438746	4.17308e-06		3primeCassette		829		altexon
FBgn0033095	CG3409	2R	2603370	This gene is referred to in FlyBase by the symbol Dmel\CG3409 (CG3409, FBgn0033095). It is a protein_coding_gene from Drosophila melanogaster. Its sequence location is 2R:2587200..2603370. It has the cytological map location 42C5-42C6. Based on sequence similarity, it is predicted to have molecular function</span>: monocarboxylic acid transmembrane transporter activity. An electronic pipeline bas…	2	0.449721	7.12164e-10	5primeCassette	526	762			altexon
FBgn0015766	Msr-110	3L	5570448	The gene Msr-110 is referred to in FlyBase by the symbol Dmel\Msr-110 (CG10596, FBgn0015766). It is a protein_coding_gene from Drosophila melanogaster. Its sequence location is 3L:5560001..5570448. It has the cytological map location 64D3. Its molecular function is unknown. The biological processes in which it is involved are not known. 3 alleles are reported. No phenotypic data is available. It …	2	0.455664	7.9803e-23					27
FBgn0015778	rin	3R	9472687	The gene rasputin is referred to in FlyBase by the symbol Dmel\rin (CG9412, FBgn0015778). It is a protein_coding_gene from Drosophila melanogaster. Its sequence location is 3R:9472687..9478761. It has the cytological map location 87F6-87F7. Based on sequence similarity, it is predicted to have molecular function</span>: mRNA binding; SH3 domain binding; protein binding. There is experimental evid…	4	0.461976	2.0715e-138	5primeCassette		236			altexon
FBgn0051030	CG31030	3R	25992152	This gene is referred to in FlyBase by the symbol Dmel\CG31030 (CG31030, FBgn0051030). It is a protein_coding_gene from Drosophila melanogaster. Its sequence location is 3R:25990414..25992152. It has the cytological map location 99E1. An electronic pipeline based on InterPro domains suggests that it has the molecular function</span>: hydrogen ion transporting ATP synthase activity, rotational mec…	2	0.462728	1.28233e-19						altexon
FBgn0052626	CG32626	X	13739894	This gene is referred to in FlyBase by the symbol Dmel\CG32626 (CG32626, FBgn0052626). It is a protein_coding_gene from Drosophila melanogaster. Its sequence location is X:13724782..13739894. It has the cytological map location 12C6-12C7. There is experimental evidence that it has the molecular function</span>: protein binding. An electronic pipeline based on InterPro domains suggests that it is …	4	0.463518	7.64516e-48	5primeCassette		510			altexon
FBgn0053129	CG33129	2L	10970275	This gene is referred to in FlyBase by the symbol Dmel\CG33129 (CG33129, FBgn0053129). It is a protein_coding_gene from Drosophila melanogaster. Its sequence location is 2L:10964903..10970275. It has the cytological map location 32C1. Its molecular function is unknown. The biological processes in which it is involved are not known. 12 alleles are reported. No phenotypic data is available. It has …	2	0.467917	1	5primeCassette		274		120	altexon
FBgn0037057	CG10512	3L	21196020	This gene is referred to in FlyBase by the symbol Dmel\CG10512 (CG10512, FBgn0037057). It is a protein_coding_gene from Drosophila melanogaster. Its sequence location is 3L:21196020..21201194. It has the cytological map location 78C2. An electronic pipeline based on InterPro domains suggests that it has the molecular function</span>: oxidoreductase activity. An electronic pipeline based on InterP…	2	0.474552	1	5primeCassette		403			altexon
FBgn0020312	CG4050	2R	17015995	This gene is referred to in FlyBase by the symbol Dmel\CG4050 (CG4050, FBgn0020312). It is a protein_coding_gene from Drosophila melanogaster. Its sequence location is 2R:17011233..17015995. It has the cytological map location 57C2. Based on sequence similarity, it is predicted to have molecular function</span>: protein N-acetylglucosaminyltransferase activity. The biological processes in which i…	2	0.487996	1	5primeCassette		89		159
FBgn0026084	cib	X	4000148	The gene ciboulot is referred to in FlyBase by the symbol Dmel\cib (CG4944, FBgn0026084). It is a protein_coding_gene from Drosophila melanogaster. Its sequence location is X:4000148..4005014. It has the cytological map location 4A5. There is experimental evidence that it has the molecular function</span>: actin monomer binding. There is experimental evidence that it is involved in the biological…	2	0.489502	5.0433e-28	5primeCassette	344	159			altexon
FBgn0051641	stai	2L	6100378	The gene stathmin is referred to in FlyBase by the symbol Dmel\stai (CG31641, FBgn0051641). It is a protein_coding_gene from Drosophila melanogaster. Its sequence location is 2L:6100378..6123905. It has the cytological map location 26B5-26B7. Based on sequence similarity, it is predicted to have molecular function</span>: microtubule binding. There is experimental evidence that it is involved in …	2	0.497606	1	5primeCassette		172		84	altexon
FBgn0037636	CG9821	3R	4646386	This gene is referred to in FlyBase by the symbol Dmel\CG9821 (CG9821, FBgn0037636). It is a protein_coding_gene from Drosophila melanogaster. Its sequence location is 3R:4643363..4646386. It has the cytological map location 85B2. Its molecular function is unknown. The biological processes in which it is involved are not known. 5 alleles are reported. The phenotypes of these alleles are annotated…	2	0.525015	1	8					altexon
FBgn0025628	CG4199	X	1967511	This gene is referred to in FlyBase by the symbol Dmel\CG4199 (CG4199, FBgn0025628). It is a protein_coding_gene from Drosophila melanogaster. Its sequence location is X:1960468..1967511. It has the cytological map location 2C9-2C10. An electronic pipeline based on InterPro domains suggests that it has the molecular function</span>: 2 iron, 2 sulfur cluster binding; oxidoreductase activity; FAD b…	2	0.536599	1	5primeCassette		224			altexon
FBgn0027579	CG5508	3R	23750915	This gene is referred to in FlyBase by the symbol Dmel\CG5508 (CG5508, FBgn0027579). It is a protein_coding_gene from Drosophila melanogaster. Its sequence location is 3R:23750915..23758844. It has the cytological map location 98B6. Based on sequence similarity, it is predicted to have molecular function</span>: glycerol-3-phosphate O-acyltransferase activity. Based on sequence similarity, it is …	2	0.540092	0.00025339	5primeCassette		801			altexon
FBgn0014133	bif	X	11573028	The gene bifocal is referred to in FlyBase by the symbol Dmel\bif (CG1822, FBgn0014133). It is a protein_coding_gene from Drosophila melanogaster. Its sequence location is X:11573028..11588774. It has the cytological map location 10D4-10D5. There is experimental evidence that it has the molecular function</span>: actin binding; actin filament binding; microtubule binding. There is experimental ev…	2	0.558817	3.22728e-40		8			379	altexon
FBgn0040370	CG13375	X	188995	This gene is referred to in FlyBase by the symbol Dmel\CG13375 (CG13375, FBgn0040370). It is a protein_coding_gene from Drosophila melanogaster. Its sequence location is X:180434..188995. It has the cytological map location 1A1. Based on sequence similarity, it is predicted to have molecular function</span>: GTPase activity. An electronic pipeline based on InterPro domains suggests that it is inv…	2	0.583536	1						altexon
FBgn0038147	CG14375	3R	9220912	This gene is referred to in FlyBase by the symbol Dmel\CG14375 (CG14375, FBgn0038147). It is a protein_coding_gene from Drosophila melanogaster. Its sequence location is 3R:9214781..9220912. It has the cytological map location 87E8. Its molecular function is unknown. The biological processes in which it is involved are not known. 2 alleles are reported. No phenotypic data is available. It has 3 a…	2	0.591312	0.282737	5primeCassette		130			altexon
FBgn0038975	Nrx-1	3R	18294258	The gene Neurexin 1 is referred to in FlyBase by the symbol Dmel\Nrx-1 (CG7050, FBgn0038975). It is a protein_coding_gene from Drosophila melanogaster. Its sequence location is 3R:18294258..18309680. It has the cytological map location 94A16-94B1. Its molecular function is unknown. There is experimental evidence that it is involved in the biological process</span>: synaptic transmission; synapse …	2	0.62379	1						altexon
FBgn0022343	CG3760	2R	20825862	This gene is referred to in FlyBase by the symbol Dmel\CG3760 (CG3760, FBgn0022343). It is a protein_coding_gene from Drosophila melanogaster. Its sequence location is 2R:20825862..20827292. It has the cytological map location 60E5. Its molecular function is unknown. The biological processes in which it is involved are not known. 5 alleles are reported. No phenotypic data is available. It has 2 a…	2	0.630531	5.41989e-09		86				altexon
FBgn0027654	jdp	3R	26352761	The gene jdp is referred to in FlyBase by the symbol Dmel\jdp (CG2239, FBgn0027654). It is a protein_coding_gene from Drosophila melanogaster. Its sequence location is 3R:26342774..26352761. It has the cytological map location 99F7. An electronic pipeline based on InterPro domains suggests that it has the molecular function</span>: heat shock protein binding; unfolded protein binding. An electron…	2	0.664121	1						altexon
FBgn0027101	Dyrk3	4	1234433	The gene Dyrk3 is referred to in FlyBase by the symbol Dmel\Dyrk3 (CG40478, FBgn0027101). It is a protein_coding_gene from Drosophila melanogaster. Its sequence location is 4:1228840..1234433. It has the cytological map location 102F8. Based on sequence similarity, it is predicted to have molecular function</span>: protein serine/threonine kinase activity. Based on sequence similarity, it is pred…	3	0.665191	3.67777e-06	11	621			115	altexon
FBgn0016059	Sema-1b	2R	13571000	The gene Sema-1b is referred to in FlyBase by the symbol Dmel\Sema-1b (CG6446, FBgn0016059). It is a protein_coding_gene from Drosophila melanogaster. Its sequence location is 2R:13560344..13571000. It has the cytological map location 54D4-54D5. An electronic pipeline based on InterPro domains suggests that it has the molecular function</span>: receptor activity. There is experimental evidence th…	2	0.679961	3.34933e-23	5primeCassette	448	103		183	altexon
FBgn0037070	CG11309	3L	21297562	This gene is referred to in FlyBase by the symbol Dmel\CG11309 (CG11309, FBgn0037070). It is a protein_coding_gene from Drosophila melanogaster. Its sequence location is 3L:21295376..21297562. It has the cytological map location 78C6. Its molecular function is unknown. The biological processes in which it is involved are not known. 4 alleles are reported. No phenotypic data is available. It has 2…	2	0.710482	1.90276e-20		204			30	altexon
FBgn0027504	CG8878	2R	8038562	This gene is referred to in FlyBase by the symbol Dmel\CG8878 (CG8878, FBgn0027504). It is a protein_coding_gene from Drosophila melanogaster. Its sequence location is 2R:8033524..8038562. It has the cytological map location 48E2-48E3. Based on sequence similarity, it is predicted to have molecular function</span>: protein serine/threonine kinase activity. It is reported to be involved in the bio…	2	0.759358	1						altexon
FBgn0030478	CG1640	X	13264639	This gene is referred to in FlyBase by the symbol Dmel\CG1640 (CG1640, FBgn0030478). It is a protein_coding_gene from Drosophila melanogaster. Its sequence location is X:13264639..13274193. It has the cytological map location 11F1. Based on sequence similarity, it is predicted to have molecular function</span>: L-alanine:2-oxoglutarate aminotransferase activity. An electronic pipeline based on In…	3	0.762409	8.88867e-08	36					altexon
FBgn0035253	CG7971	3L	1665060	This gene is referred to in FlyBase by the symbol Dmel\CG7971 (CG7971, FBgn0035253). It is a protein_coding_gene from Drosophila melanogaster. Its sequence location is 3L:1654247..1665060. It has the cytological map location 62A10. Its molecular function is unknown. Based on sequence similarity, it is predicted to be involved in the biological process</span>: RNA splicing. 3 alleles are reported.…	4	0.762858	1.47402e-09	5primeCassette	3primeCassette	143	142		altexon
FBgn0002440	l(3)mbn	3L	6121719	The gene lethal (3) malignant blood neoplasm is referred to in FlyBase by the symbol Dmel\l(3)mbn (CG12755, FBgn0002440). It is a protein_coding_gene from Drosophila melanogaster. Its sequence location is 3L:6116986..6121719. It has the cytological map location 65A6. Based on sequence similarity, it is predicted to have molecular function</span>: structural constituent of chitin-based cuticle. It…	2	0.811032	1						altexon
FBgn0051534	CG31534	3R	531458	This gene is referred to in FlyBase by the symbol Dmel\CG31534 (CG31534, FBgn0051534). It is a protein_coding_gene from Drosophila melanogaster. Its sequence location is 3R:531458..537915. It has the cytological map location 82D2. An electronic pipeline based on InterPro domains suggests that it has the molecular function</span>: zinc ion binding. The biological processes in which it is involved …	4	0.831414	1					148	altexon
FBgn0086906	sls	3L	2115617	The gene sallimus is referred to in FlyBase by the symbol Dmel\sls (CG1915, FBgn0086906). It is a protein_coding_gene from Drosophila melanogaster. Its sequence location is 3L:2040179..2115617. It has the cytological map location 62C2-62C4. There is experimental evidence that it has the molecular function</span>: actin binding; structural constituent of muscle. There is experimental evidence that…	2	0.841468	1		3primeCassette		394		altexon
FBgn0026059	Mhcl	3R	11923310	The gene Myosin heavy chain-like is referred to in FlyBase by the symbol Dmel\Mhcl (CG31045, FBgn0026059). It is a protein_coding_gene from Drosophila melanogaster. Its sequence location is 3R:11894245..11923310. It has the cytological map location 89B2-89B3. Based on sequence similarity, it is predicted to have molecular function</span>: ATPase activity, coupled. The biological processes in whic…	4	0.844717	9.95908e-21	5primeCassette	3primeCassette	705	92		altexon
FBgn0019890	Smg5	2L	13904659	The gene Smg5 is referred to in FlyBase by the symbol Dmel\Smg5 (CG8954, FBgn0019890). It is a protein_coding_gene from Drosophila melanogaster. Its sequence location is 2L:13899353..13904659. It has the cytological map location 34E2. Its molecular function is unknown. There is experimental evidence that it is involved in the biological process</span>: nuclear-transcribed mRNA catabolic process, …	2	0.849807	1.19859e-24	5primeCassette		262			altexon
FBgn0016917	Stat92E	3R	16378034	The gene Signal-transducer and activator of transcription protein at 92E is referred to in FlyBase by the symbol Dmel\Stat92E (CG4257, FBgn0016917). It is a protein_coding_gene from Drosophila melanogaster. Its sequence location is 3R:16361405..16378034. It has the cytological map location 92F1. There is experimental evidence that it has the molecular function</span>: protein binding. There is ex…	4	0.857727	4.33582e-41						altexon
FBgn0036144	GlcAT-P	3L	11190603	The gene GlcAT-P is referred to in FlyBase by the symbol Dmel\GlcAT-P (CG6207, FBgn0036144). It is a protein_coding_gene from Drosophila melanogaster. Its sequence location is 3L:11170048..11190603. It has the cytological map location 68B1. There is experimental evidence that it has the molecular function</span>: asioloorosomucoid beta-1,3-glucuronosyltransferase activity; galactosylgalactosylxyl…	3	0.938895	0.0505554						altexon
FBgn0023213	eIF4G	4	951347	The gene eukaryotic translation initiation factor 4G is referred to in FlyBase by the symbol Dmel\eIF4G (CG10811, FBgn0023213). It is a protein_coding_gene from Drosophila melanogaster. Its sequence location is 4:935911..951347. It has the cytological map location 102F1. There is experimental evidence that it has the molecular function</span>: RNA 7-methylguanosine cap binding. There is experimen…	2	0.942994	1					759
FBgn0038652	CG7720	3R	14620876	This gene is referred to in FlyBase by the symbol Dmel\CG7720 (CG7720, FBgn0038652). It is a protein_coding_gene from Drosophila melanogaster. Its sequence location is 3R:14584958..14620876. It has the cytological map location 91C6-91D1. Based on sequence similarity, it is predicted to have molecular function</span>: sodium:iodide symporter activity. An electronic pipeline based on InterPro domai…	4	0.964215	1	5primeCassette		144			altexon
FBgn0032820	fbp	2L	19764134	The gene fructose-1,6-bisphosphatase is referred to in FlyBase by the symbol Dmel\fbp (CG31692, FBgn0032820). It is a protein_coding_gene from Drosophila melanogaster. Its sequence location is 2L:19761579..19764134. It has the cytological map location 38A2-38A3. Based on sequence similarity, it is predicted to have molecular function</span>: fructose 1,6-bisphosphate 1-phosphatase activity. An el…	2	0.967778	1.37409e-13					72
FBgn0000024	Ace	3R	9085240	The gene Acetylcholine esterase is referred to in FlyBase by the symbol Dmel\Ace (CG17907, FBgn0000024). It is a protein_coding_gene from Drosophila melanogaster. Its sequence location is 3R:9053964..9085240. It has the cytological map location 87E2-87E3. There is experimental evidence that it has the molecular function</span>: cholinesterase activity; protein homodimerization activity; acetylcho…	2	1	1	5primeCassette		66			altexon
FBgn0000038	nAcRbeta-64B	3L	4429370	The gene nicotinic Acetylcholine Receptor beta 64B is referred to in FlyBase by the symbol Dmel\nAcRÎ²-64B (CG11348, FBgn0000038). It is a protein_coding_gene from Drosophila melanogaster. Its sequence location is 3L:4429370..4435999. It has the cytological map location 64B6. Based on sequence similarity, it is predicted to have molecular function</span>: nicotinic acetylcholine-activated cation-…	2	1	1	8	3primeCassette		825		altexon
FBgn0000054	Adf1	2R	2549774	The gene Adh transcription factor 1 is referred to in FlyBase by the symbol Dmel\Adf1 (CG15845, FBgn0000054). It is a protein_coding_gene from Drosophila melanogaster. Its sequence location is 2R:2549774..2555592. It has the cytological map location 42C3. Based on sequence similarity, it is predicted to have molecular function</span>: general RNA polymerase II transcription factor activity. There…	2	1	1						altexon
FBgn0000075	amd	2L	19110159	The gene Î± methyl dopa-resistant is referred to in FlyBase by the symbol Dmel\amd (CG10501, FBgn0000075). It is a protein_coding_gene from Drosophila melanogaster. Its sequence location is 2L:19110159..19114110. It has the cytological map location 37C1. Based on sequence similarity, it is predicted to have molecular function</span>: aromatic-L-amino-acid decarboxylase activity. It is reported to…	2	1	1	5primeCassette		192			altexon
FBgn0000083	AnnIX	3R	16890951	The gene Annexin IX is referred to in FlyBase by the symbol Dmel\AnnIX (CG5730, FBgn0000083). It is a protein_coding_gene from Drosophila melanogaster. Its sequence location is 3R:16890951..16896639. It has the cytological map location 93B9-93B10. Based on sequence similarity, it is predicted to have molecular function</span>: calcium ion binding; calcium-dependent phospholipid binding; actin bin…	3	1	1		3primeCassette		194		altexon
FBgn0000179	bi	X	4306889	The gene bifid is referred to in FlyBase by the symbol Dmel\bi (CG3578, FBgn0000179). It is a protein_coding_gene from Drosophila melanogaster. Its sequence location is X:4306889..4378485. It has the cytological map location 4C3-4C4. Based on sequence similarity, it is predicted to have molecular function</span>: transcription factor activity; RNA polymerase II transcription factor activity. Ther…	2	1	1	5primeCassette		438			altexon
FBgn0000210	br	X	1469165	The gene broad is referred to in FlyBase by the symbol Dmel\br (CG11491, FBgn0000210). It is a protein_coding_gene from Drosophila melanogaster. Its sequence location is X:1469165..1553962. It has the cytological map location 2B3-2B4. There is experimental evidence that it has the molecular function</span>: specific transcriptional repressor activity; DNA binding. There is experimental evidence f…	3	1	1	5primeCassette	3primeCassette	590	1142		altexon
FBgn0000228	Bsg25D	2L	5278558	The gene Blastoderm-specific gene 25D is referred to in FlyBase by the symbol Dmel\Bsg25D (CG14025, FBgn0000228). It is a protein_coding_gene from Drosophila melanogaster. Its sequence location is 2L:5271728..5278558. It has the cytological map location 25D2-25D3. Its molecular function is unknown. The biological processes in which it is involved are not known. 4 alleles are reported. No phenotyp…	3	1	1					220	altexon
FBgn0000250	cact	2L	16326101	The gene cactus is referred to in FlyBase by the symbol Dmel\cact (CG5848, FBgn0000250). It is a protein_coding_gene from Drosophila melanogaster. Its sequence location is 2L:16313029..16326101. It has the cytological map location 35F1. There is experimental evidence that it has the molecular function</span>: protein binding. There is experimental evidence that it is involved in the biological pr…	2	1	1		3primeCassette		422		altexon
FBgn0000258	CkIIalpha	3L	23092680	The gene Casein kinase II Î± subunit is referred to in FlyBase by the symbol Dmel\CkIIÎ± (CG17520, FBgn0000258). It is a protein_coding_gene from Drosophila melanogaster. Its sequence location is 3L:23092680..23096562. It has the cytological map location 80D1. There is experimental evidence that it has the molecular function</span>: protein serine/threonine kinase activity. There is experimental …	3	1	1		2				altexon
FBgn0000286	Cf2	2L	4883341	The gene Chorion factor 2 is referred to in FlyBase by the symbol Dmel\Cf2 (CG11924, FBgn0000286). It is a protein_coding_gene from Drosophila melanogaster. Its sequence location is 2L:4877289..4883341. It has the cytological map location 25B1. There is experimental evidence that it has the molecular function</span>: RNA polymerase II transcription factor activity; DNA binding. It is reported to …	2	1	1	228					altexon
FBgn0000289	cg	2R	10061175	The gene combgap is referred to in FlyBase by the symbol Dmel\cg (CG8367, FBgn0000289). It is a protein_coding_gene from Drosophila melanogaster. Its sequence location is 2R:10061175..10070345. It has the cytological map location 50E1. It is reported to have molecular function</span>: transcription factor activity. There is experimental evidence that it is involved in the biological process</span…	3	1	1	455	3primeCassette		1630	303	altexon
FBgn0000320	eya	2L	6546972	The gene eyes absent is referred to in FlyBase by the symbol Dmel\eya (CG9554, FBgn0000320). It is a protein_coding_gene from Drosophila melanogaster. Its sequence location is 2L:6527449..6546972. It has the cytological map location 26E1-26E2. There is experimental evidence that it has the molecular function</span>: protein tyrosine phosphatase activity. There is experimental evidence for 12 uniq…	2	1	1	5primeCassette		524			altexon
FBgn0000339	cni	2L	16310736	The gene cornichon is referred to in FlyBase by the symbol Dmel\cni (CG5855, FBgn0000339). It is a protein_coding_gene from Drosophila melanogaster. Its sequence location is 2L:16309594..16310736. It has the cytological map location 35F1. Its molecular function is unknown. There is experimental evidence that it is involved in the biological process</span>: blastoderm segmentation; establishment o…	2	1	1	5primeCassette		46			altexon
FBgn0000370	crc	2L	21310854	The gene cryptocephal is referred to in FlyBase by the symbol Dmel\crc (CG8669, FBgn0000370). It is a protein_coding_gene from Drosophila melanogaster. Its sequence location is 2L:21310854..21319536. It has the cytological map location 39C2-39C3. There is experimental evidence that it has the molecular function</span>: transcription regulator activity. There is experimental evidence that it is in…	2	1	1	5primeCassette		179			altexon
FBgn0000448	Hr46	2R	6124853	The gene Hormone receptor-like in 46 is referred to in FlyBase by the symbol Dmel\Hr46 (CG33183, FBgn0000448). It is a protein_coding_gene from Drosophila melanogaster. Its sequence location is 2R:6092959..6124853. It has the cytological map location 46F5-46F7. There is experimental evidence that it has the molecular function</span>: protein binding; ligand-dependent nuclear receptor activity. Th…	2	1	1	5primeCassette		1368			altexon
FBgn0000490	dpp	2L	2428454	The gene decapentaplegic is referred to in FlyBase by the symbol Dmel\dpp (CG9885, FBgn0000490). It is a protein_coding_gene from Drosophila melanogaster. Its sequence location is 2L:2428454..2459609. It has the cytological map location 22F1-22F3. There is experimental evidence that it has the molecular function</span>: specific transcriptional repressor activity; protein heterodimerization activ…	2	1	1	5primeCassette		597			altexon
FBgn0000542	ec	X	3705976	The gene echinus is referred to in FlyBase by the symbol Dmel\ec (CG2904, FBgn0000542). It is a protein_coding_gene from Drosophila melanogaster. Its sequence location is X:3705976..3751658. It has the cytological map location 3F2-3F3. It is reported to have molecular function</span>: ubiquitin thiolesterase activity. There is experimental evidence that it is involved in the biological process</s…	2	1	1	5primeCassette		745		466	altexon
FBgn0000565	Eip71CD	3L	15504153	The gene Ecdysone-induced protein 28/29kD is referred to in FlyBase by the symbol Dmel\Eip71CD (CG7266, FBgn0000565). It is a protein_coding_gene from Drosophila melanogaster. Its sequence location is 3L:15504153..15506302. It has the cytological map location 71D3-71D4. There is experimental evidence that it has the molecular function</span>: peptide-methionine-(S)-S-oxide reductase activity. The…	2	1	1	5primeCassette		117			altexon
FBgn0000567	Eip74EF	3L	17612407	The gene Ecdysone-induced protein 74EF is referred to in FlyBase by the symbol Dmel\Eip74EF (CG32180, FBgn0000567). It is a protein_coding_gene from Drosophila melanogaster. Its sequence location is 3L:17553258..17612407. It has the cytological map location 74D4-74E2. Based on sequence similarity, it is predicted to have molecular function</span>: specific RNA polymerase II transcription factor a…	2	1	1	5primeCassette		657			altexon
FBgn0000578	ena	2R	15029140	The gene enabled is referred to in FlyBase by the symbol Dmel\ena (CG15112, FBgn0000578). It is a protein_coding_gene from Drosophila melanogaster. Its sequence location is 2R:15029140..15050124. It has the cytological map location 56B5-56C1. There is experimental evidence that it has the molecular function</span>: protein binding; SH3 domain binding. There is experimental evidence for 12 unique …	2	1	1	5primeCassette	18	720			altexon
FBgn0000635	Fas2	X	4100123	The gene Fasciclin 2 is referred to in FlyBase by the symbol Dmel\Fas2 (CG3665, FBgn0000635). It is a protein_coding_gene from Drosophila melanogaster. Its sequence location is X:4028405..4100123. It has the cytological map location 4B1-4B3. There is experimental evidence that it has the molecular function</span>: protein binding. There is experimental evidence for 13 unique biological process</s…	3	1	1		3primeCassette		532		altexon
FBgn0000662	fl(2)d	2R	9712059	The gene female lethal d is referred to in FlyBase by the symbol Dmel\fl(2)d (CG6315, FBgn0000662). It is a protein_coding_gene from Drosophila melanogaster. Its sequence location is 2R:9707129..9712059. It has the cytological map location 50C6. Its molecular function is unknown. There is experimental evidence that it is involved in the biological process</span>: RNA splicing, via transesterifica…	2	1	1	25				360	altexon
FBgn0000667	Actn	X	1936344	The gene Î± actinin is referred to in FlyBase by the symbol Dmel\Actn (CG4376, FBgn0000667). It is a protein_coding_gene from Drosophila melanogaster. Its sequence location is X:1919149..1936344. It has the cytological map location 2C4-2C7. Based on sequence similarity, it is predicted to have molecular function</span>: calcium ion binding; actin filament binding; actin binding. There is experime…	2	1	1	5primeCassette		265			altexon
FBgn0000711	flw	X	10279966	The gene flapwing is referred to in FlyBase by the symbol Dmel\flw (CG2096, FBgn0000711). It is a protein_coding_gene from Drosophila melanogaster. Its sequence location is X:10279966..10302119. It has the cytological map location 9B14-9C1. There is experimental evidence that it has the molecular function</span>: myosin phosphatase activity. There is experimental evidence that it is involved in t…	2	1	1		1			393	altexon
FBgn0000719	fog	X	22257020	The gene folded gastrulation is referred to in FlyBase by the symbol Dmel\fog (CG9559, FBgn0000719). It is a protein_coding_gene from Drosophila melanogaster. Its sequence location is X:22227998..22257020. It has the cytological map location 20E2-20F1. Its molecular function is unknown. There is experimental evidence that it is involved in the biological process</span>: regulation of cell shape; …	2	1	1	41					altexon
FBgn0001078	ftz-f1	3L	18791831	The gene ftz transcription factor 1 is referred to in FlyBase by the symbol Dmel\ftz-f1 (CG4059, FBgn0001078). It is a protein_coding_gene from Drosophila melanogaster. Its sequence location is 3L:18745014..18791831. It has the cytological map location 75D8-75E1. There is experimental evidence that it has the molecular function</span>: DNA binding. There is experimental evidence that it is involv…	2	1	1	5primeCassette		1195			altexon
FBgn0001083	fw	X	11897943	The gene furrowed is referred to in FlyBase by the symbol Dmel\fw (CG1500, FBgn0001083). It is a protein_coding_gene from Drosophila melanogaster. Its sequence location is X:11886948..11897943. It has the cytological map location 11A1. An electronic pipeline based on InterPro domains suggests that it has the molecular function</span>: binding. There is experimental evidence that it is involved in…	2	1	1	5primeCassette		164			altexon
FBgn0001123	G-salpha60A	2R	19830064	The gene G protein sÎ± 60A is referred to in FlyBase by the symbol Dmel\G-sÎ±60A (CG2835, FBgn0001123). It is a protein_coding_gene from Drosophila melanogaster. Its sequence location is 2R:19830064..19834459. It has the cytological map location 60A12-60A13. Based on sequence similarity, it is predicted to have molecular function</span>: GTPase activity. There is experimental evidence that it is …	3	1	1	13					altexon
FBgn0001139	gro	3R	21867432	The gene groucho is referred to in FlyBase by the symbol Dmel\gro (CG8384, FBgn0001139). It is a protein_coding_gene from Drosophila melanogaster. Its sequence location is 3R:21867432..21874621. It has the cytological map location 96F10. There is experimental evidence that it has the molecular function</span>: protein binding; transcription corepressor activity. There is experimental evidence tha…	2	1	1	5primeCassette		192			altexon
FBgn0001248	Idh	3L	8354628	The gene Isocitrate dehydrogenase is referred to in FlyBase by the symbol Dmel\Idh (CG7176, FBgn0001248). It is a protein_coding_gene from Drosophila melanogaster. Its sequence location is 3L:8349503..8354628. It has the cytological map location 66C8. There is experimental evidence that it has the molecular function</span>: isocitrate dehydrogenase (NADP+) activity. Based on sequence similarity, …	2	1	1	5primeCassette		139		524
FBgn0001250	if	X	16677467	The gene inflated is referred to in FlyBase by the symbol Dmel\if (CG9623, FBgn0001250). It is a protein_coding_gene from Drosophila melanogaster. Its sequence location is X:16646222..16677467. It has the cytological map location 15A5-15A7. There is experimental evidence that it has the molecular function</span>: cell adhesion molecule binding; receptor activity. There is experimental evidence th…	3	1	1	5primeCassette		117		26
FBgn0001257	ImpL2	3L	4236147	The gene Ecdysone-inducible gene L2 is referred to in FlyBase by the symbol Dmel\ImpL2 (CG15009, FBgn0001257). It is a protein_coding_gene from Drosophila melanogaster. Its sequence location is 3L:4224699..4236147. It has the cytological map location 64A10. Its molecular function is unknown. It is reported to be involved in the biological process</span>: cell adhesion. 15 alleles are reported. No…	2	1	1	5primeCassette		245			altexon
FBgn0001296	kar	3R	8515089	The gene karmoisin is referred to in FlyBase by the symbol Dmel\kar (CG12286, FBgn0001296). It is a protein_coding_gene from Drosophila melanogaster. Its sequence location is 3R:8507908..8515089. It has the cytological map location 87C5. Based on sequence similarity, it is predicted to have molecular function</span>: monocarboxylic acid transmembrane transporter activity. There is experimental ev…	2	1	1		3primeCassette		357		altexon
FBgn0001297	kay	3R	25592497	The gene kayak is referred to in FlyBase by the symbol Dmel\kay (CG33956, FBgn0001297). It is a protein_coding_gene from Drosophila melanogaster. Its sequence location is 3R:25592497..25619838. It has the cytological map location 99B10-99C1. There is experimental evidence that it has the molecular function</span>: protein binding; sequence-specific DNA binding; RNA polymerase II transcription fac…	3	1	1	5primeCassette		843			altexon
FBgn0001311	kkv	3R	1218587	The gene krotzkopf verkehrt is referred to in FlyBase by the symbol Dmel\kkv (CG2666, FBgn0001311). It is a protein_coding_gene from Drosophila melanogaster. Its sequence location is 3R:1203815..1218587. It has the cytological map location 83A1. Based on sequence similarity, it is predicted to have molecular function</span>: chitin synthase activity. There is experimental evidence that it is invo…	2	1	1					177
FBgn0001404	egh	X	2482534	The gene egghead is referred to in FlyBase by the symbol Dmel\egh (CG9659, FBgn0001404). It is a protein_coding_gene from Drosophila melanogaster. Its sequence location is X:2482534..2492638. It has the cytological map location 3A6. There is experimental evidence that it has the molecular function</span>: beta-1,4-mannosyltransferase activity. There is experimental evidence for 15 unique biologic…	2	1	1	5primeCassette		1006			altexon
FBgn0001961	Sop2	2L	13829739	The gene Suppressor of profilin 2 is referred to in FlyBase by the symbol Dmel\Sop2 (CG8978, FBgn0001961). It is a protein_coding_gene from Drosophila melanogaster. Its sequence location is 2L:13827932..13829739. It has the cytological map location 34D1. Based on sequence similarity, it is predicted to have molecular function</span>: actin binding. There is experimental evidence that it is involv…	2	1	1	5primeCassette		30			altexon
FBgn0002023	Lim3	2L	19108108	The gene Lim3 is referred to in FlyBase by the symbol Dmel\Lim3 (CG10699, FBgn0002023). It is a protein_coding_gene from Drosophila melanogaster. Its sequence location is 2L:19079234..19108108. It has the cytological map location 37B13-37C1. Based on sequence similarity, it is predicted to have molecular function</span>: transcription factor activity. There is experimental evidence that it is inv…	2	1	1	5primeCassette	7	72		403	altexon
FBgn0002044	swm	2L	19493258	The gene second mitotic wave missing is referred to in FlyBase by the symbol Dmel\swm (CG10084, FBgn0002044). It is a protein_coding_gene from Drosophila melanogaster. Its sequence location is 2L:19493258..19497987. It has the cytological map location 37E4. An electronic pipeline based on InterPro domains suggests that it has the molecular function</span>: nucleotide binding; zinc ion binding; nu…	2	1	1	5primeCassette		125			altexon
FBgn0002183	dre4	3L	1876336	The gene dre4 is referred to in FlyBase by the symbol Dmel\dre4 (CG1828, FBgn0002183). It is a protein_coding_gene from Drosophila melanogaster. Its sequence location is 3L:1871574..1876336. It has the cytological map location 62B7. Based on sequence similarity, it is predicted to have molecular function</span>: DNA binding. There is experimental evidence that it is involved in the biological pro…	2	1	1					117
FBgn0002306	sas	3R	2988551	The gene stranded at second is referred to in FlyBase by the symbol Dmel\sas (CG2507, FBgn0002306). It is a protein_coding_gene from Drosophila melanogaster. Its sequence location is 3R:2988551..3009424. It has the cytological map location 84C8-84D1. It is reported to have molecular function</span>: receptor activity. There is experimental evidence that it is involved in the biological process</s…	2	1	1					1035	altexon
FBgn0002441	l(3)mbt	3R	23098995	The gene lethal (3) malignant brain tumor is referred to in FlyBase by the symbol Dmel\l(3)mbt (CG5954, FBgn0002441). It is a protein_coding_gene from Drosophila melanogaster. Its sequence location is 3R:23091952..23098995. It has the cytological map location 97F1. There is experimental evidence that it has the molecular function</span>: protein binding. There is experimental evidence that it is …	2	1	1	5primeCassette	95	263			altexon
FBgn0002521	pho	4	1202271	The gene pleiohomeotic is referred to in FlyBase by the symbol Dmel\pho (CG17743, FBgn0002521). It is a protein_coding_gene from Drosophila melanogaster. Its sequence location is 4:1193094..1202271. It has the cytological map location 102F8. There is experimental evidence that it has the molecular function</span>: chromatin DNA binding; chromatin binding; DNA binding. There is experimental eviden…	2	1	1	29					altexon
FBgn0002566	lt	2L	22817519	The gene light is referred to in FlyBase by the symbol Dmel\lt (CG18028, FBgn0002566). It is a protein_coding_gene from Drosophila melanogaster. Its sequence location is 2L:22817519..22833492. An electronic pipeline based on InterPro domains suggests that it has the molecular function</span>: protein binding; zinc ion binding. There is experimental evidence that it is involved in the biological p…	2	1	1						altexon
FBgn0002638	Bj1	3L	5925873	The gene Bj1 protein is referred to in FlyBase by the symbol Dmel\Bj1 (CG10480, FBgn0002638). It is a protein_coding_gene from Drosophila melanogaster. Its sequence location is 3L:5923362..5925873. It has the cytological map location 65A1. There is experimental evidence that it has the molecular function</span>: chromatin binding. There is experimental evidence that it is involved in the biologic…	2	1	1	106					altexon
FBgn0002774	mle	2R	1868277	The gene maleless is referred to in FlyBase by the symbol Dmel\mle (CG11680, FBgn0002774). It is a protein_coding_gene from Drosophila melanogaster. Its sequence location is 2R:1862243..1868277. It has the cytological map location 42A6. There is experimental evidence that it has the molecular function</span>: chromatin binding. There is experimental evidence that it is involved in the biological …	3	1	1						altexon
FBgn0002778	mnd	3L	14978215	The gene minidiscs is referred to in FlyBase by the symbol Dmel\mnd (CG3297, FBgn0002778). It is a protein_coding_gene from Drosophila melanogaster. Its sequence location is 3L:14978215..14984770. It has the cytological map location 71A4-71B1. Based on sequence similarity, it is predicted to have molecular function</span>: amino acid transmembrane transporter activity. There is experimental evide…	2	1	1	5primeCassette		40			altexon
FBgn0002781	mod(mdg4)	3R	17203121	The gene modifier of mdg4 is referred to in FlyBase by the symbol Dmel\mod(mdg4) (CG32491, FBgn0002781). It is a protein_coding_gene from Drosophila melanogaster. Its sequence location is 3R:17177331..17203121. It has the cytological map location 93D7-93D9. There is experimental evidence that it has the molecular function</span>: protein binding; chromatin binding. There is experimental evidence …	19	1	1		3primeCassette		598	200	altexon
FBgn0002783	mor	3R	11798636	The gene moira is referred to in FlyBase by the symbol Dmel\mor (CG18740, FBgn0002783). It is a protein_coding_gene from Drosophila melanogaster. Its sequence location is 3R:11793856..11798636. It has the cytological map location 89A8-89A11. There is experimental evidence that it has the molecular function</span>: protein binding. There is experimental evidence that it is involved in the biologic…	2	1	1						altexon
FBgn0002932	neur	3R	4865189	The gene neuralized is referred to in FlyBase by the symbol Dmel\neur (CG11988, FBgn0002932). It is a protein_coding_gene from Drosophila melanogaster. Its sequence location is 3R:4846068..4865189. It has the cytological map location 85C2-85C3. There is experimental evidence that it has the molecular function</span>: ubiquitin-protein ligase activity. There is experimental evidence for 16 unique …	2	1	1	5primeCassette		313		549
FBgn0002973	numb	2L	9437513	The gene numb is referred to in FlyBase by the symbol Dmel\numb (CG3779, FBgn0002973). It is a protein_coding_gene from Drosophila melanogaster. Its sequence location is 2L:9437513..9463293. It has the cytological map location 30B3-30B5. There is experimental evidence that it has the molecular function</span>: protein binding. There is experimental evidence that it is involved in the biological p…	2	1	1	5primeCassette		447		322	altexon
FBgn0003041	pbl	3L	7905051	The gene pebble is referred to in FlyBase by the symbol Dmel\pbl (CG8114, FBgn0003041). It is a protein_coding_gene from Drosophila melanogaster. Its sequence location is 3L:7889214..7905051. It has the cytological map location 66A18-66A19. Based on sequence similarity, it is predicted to have molecular function</span>: guanyl-nucleotide exchange factor activity. There is experimental evidence fo…	2	1	1	5primeCassette		530			altexon
FBgn0003089	pip	3L	19330699	The gene pipe is referred to in FlyBase by the symbol Dmel\pip (CG9614, FBgn0003089). It is a protein_coding_gene from Drosophila melanogaster. Its sequence location is 3L:19291630..19330699. It has the cytological map location 76A5-76A6. There is experimental evidence that it has the molecular function</span>: sulfotransferase activity. There is experimental evidence that it is involved in the b…	5	1	1		3primeCassette		236	566	altexon
FBgn0003090	pk	2R	3038207	The gene prickle is referred to in FlyBase by the symbol Dmel\pk (CG11084, FBgn0003090). It is a protein_coding_gene from Drosophila melanogaster. Its sequence location is 2R:3038207..3110885. It has the cytological map location 42F3-43A1. It is reported to have molecular function</span>: protein binding. There is experimental evidence that it is involved in the biological process</span>: establi…	2	1	1	5primeCassette		829		1430	altexon
FBgn0003091	Pkc53E	2R	12812459	The gene Protein C kinase 53E is referred to in FlyBase by the symbol Dmel\Pkc53E (CG6622, FBgn0003091). It is a protein_coding_gene from Drosophila melanogaster. Its sequence location is 2R:12812459..12830668. It has the cytological map location 53E2. There is experimental evidence that it has the molecular function</span>: protein serine/threonine kinase activity. There is experimental evidence…	2	1	1	5primeCassette		84		27	altexon
FBgn0003093	Pkc98E	3R	24864896	The gene Protein C kinase 98E is referred to in FlyBase by the symbol Dmel\Pkc98E (CG1954, FBgn0003093). It is a protein_coding_gene from Drosophila melanogaster. Its sequence location is 3R:24864896..24872756. It has the cytological map location 98F6. Based on sequence similarity, it is predicted to have molecular function</span>: protein kinase C activity; diacylglycerol binding. Based on seque…	2	1	1					32
FBgn0003118	pnt	3R	19171884	The gene pointed is referred to in FlyBase by the symbol Dmel\pnt (CG17077, FBgn0003118). It is a protein_coding_gene from Drosophila melanogaster. Its sequence location is 3R:19116826..19171884. It has the cytological map location 94E10-94E13. There is experimental evidence that it has the molecular function</span>: protein binding. There is experimental evidence for 16 unique biological process…	2	1	1	5primeCassette		765			altexon
FBgn0003162	Pu	2R	17062822	The gene Punch is referred to in FlyBase by the symbol Dmel\Pu (CG9441, FBgn0003162). It is a protein_coding_gene from Drosophila melanogaster. Its sequence location is 2R:17062822..17070121. It has the cytological map location 57C7-57C8. There is experimental evidence that it has the molecular function</span>: GTP cyclohydrolase activity; GTP cyclohydrolase I activity. There is experimental evid…	2	1	1	5primeCassette		357			altexon
FBgn0003175	px	2R	18449569	The gene plexus is referred to in FlyBase by the symbol Dmel\px (CG4444, FBgn0003175). It is a protein_coding_gene from Drosophila melanogaster. Its sequence location is 2R:18384003..18449569. It has the cytological map location 58E4-58E8. Its molecular function is unknown. There is experimental evidence that it is involved in the biological process</span>: inter-male aggressive behavior. 56 alle…	2	1	1	5primeCassette		146		205	altexon
FBgn0003204	ras	X	10638539	The gene raspberry is referred to in FlyBase by the symbol Dmel\ras (CG1799, FBgn0003204). It is a protein_coding_gene from Drosophila melanogaster. Its sequence location is X:10638539..10642839. It has the cytological map location 9E1-9E2. Based on sequence similarity, it is predicted to have molecular function</span>: IMP dehydrogenase activity. There is experimental evidence that it is involve…	2	1	1					711	altexon
FBgn0003209	raw	2L	8740633	The gene raw is referred to in FlyBase by the symbol Dmel\raw (CG12437, FBgn0003209). It is a protein_coding_gene from Drosophila melanogaster. Its sequence location is 2L:8709870..8740633. It has the cytological map location 29E4-29E6. Its molecular function is unknown. There is experimental evidence for 13 unique biological process</span> terms, many of which group under: anatomical structure d…	2	1	1	5primeCassette		249		72
FBgn0003328	scb	2R	11136290	The gene scab is referred to in FlyBase by the symbol Dmel\scb (CG8095, FBgn0003328). It is a protein_coding_gene from Drosophila melanogaster. Its sequence location is 2R:11136290..11146003. It has the cytological map location 51E10-51E11. There is experimental evidence that it has the molecular function</span>: cell adhesion molecule binding; receptor activity. There is experimental evidence th…	2	1	1	5primeCassette		699			altexon
FBgn0003339	Scr	3R	2675886	The gene Sex combs reduced is referred to in FlyBase by the symbol Dmel\Scr (CG1030, FBgn0003339). It is a protein_coding_gene from Drosophila melanogaster. Its sequence location is 3R:2648842..2675886. It has the cytological map location 84A5. Based on sequence similarity, it is predicted to have molecular function</span>: specific RNA polymerase II transcription factor activity. There is experi…	2	1	1	5primeCassette		488		660
FBgn0003345	sd	X	15700276	The gene scalloped is referred to in FlyBase by the symbol Dmel\sd (CG8544, FBgn0003345). It is a protein_coding_gene from Drosophila melanogaster. Its sequence location is X:15700276..15719755. It has the cytological map location 13F1-13F4. Based on sequence similarity, it is predicted to have molecular function</span>: specific RNA polymerase II transcription factor activity. There is experimen…	2	1	1	5primeCassette		79		560	altexon
FBgn0003386	Shaw	2L	3718187	The gene Shaker cognate w is referred to in FlyBase by the symbol Dmel\Shaw (CG2822, FBgn0003386). It is a protein_coding_gene from Drosophila melanogaster. Its sequence location is 2L:3718187..3727587. It has the cytological map location 24C1-24C2. It is reported to have molecular function</span>: voltage-gated potassium channel activity. It is reported to be involved in the biological process</…	2	1	1	5primeCassette		299			altexon
FBgn0003396	shn	2R	7061325	The gene schnurri is referred to in FlyBase by the symbol Dmel\shn (CG7734, FBgn0003396). It is a protein_coding_gene from Drosophila melanogaster. Its sequence location is 2R:7061325..7104918. It has the cytological map location 47D6-47D7. There is experimental evidence that it has the molecular function</span>: RNA polymerase II transcription factor activity. There is experimental evidence that…	2	1	1	5primeCassette		986			altexon
FBgn0003415	skd	3L	21020524	The gene skuld is referred to in FlyBase by the symbol Dmel\skd (CG9936, FBgn0003415). It is a protein_coding_gene from Drosophila melanogaster. Its sequence location is 3L:20987228..21020524. It has the cytological map location 78A2. There is experimental evidence that it has the molecular function</span>: protein binding; RNA polymerase II transcription mediator activity. There is experimental …	2	1	1					450	altexon
FBgn0003499	sr	3R	13916525	The gene stripe is referred to in FlyBase by the symbol Dmel\sr (CG7847, FBgn0003499). It is a protein_coding_gene from Drosophila melanogaster. Its sequence location is 3R:13916525..13959471. It has the cytological map location 90E4-90F1. Based on sequence similarity, it is predicted to have molecular function</span>: RNA polymerase II transcription factor activity. There is experimental evidenc…	3	1	1	132					altexon
FBgn0003607	Su(var)205	2L	8211133	The gene Suppressor of variegation 205 is referred to in FlyBase by the symbol Dmel\Su(var)205 (CG8409, FBgn0003607). It is a protein_coding_gene from Drosophila melanogaster. Its sequence location is 2L:8209626..8211133. It has the cytological map location 28F2-28F3. There is experimental evidence that it has the molecular function</span>: satellite DNA binding; rDNA binding; chromatin binding. …	2	1	1	5primeCassette		155			altexon
FBgn0003612	Su(var)2-10	2R	5003631	The gene Suppressor of variegation 2-10 is referred to in FlyBase by the symbol Dmel\Su(var)2-10 (CG8068, FBgn0003612). It is a protein_coding_gene from Drosophila melanogaster. Its sequence location is 2R:5003631..5009507. It has the cytological map location 45A8-45A9. Based on sequence similarity, it is predicted to have molecular function</span>: DNA binding. There is experimental evidence tha…	5	1	1		3primeCassette		517		altexon
FBgn0003651	svp	3R	8084471	The gene seven up is referred to in FlyBase by the symbol Dmel\svp (CG11502, FBgn0003651). It is a protein_coding_gene from Drosophila melanogaster. Its sequence location is 3R:8084471..8128509. It has the cytological map location 87B4-87B5. There is experimental evidence that it has the molecular function</span>: protein binding. There is experimental evidence that it is involved in the biologic…	2	1	1	5primeCassette		103			altexon
FBgn0003716	tkv	2L	5271353	The gene thickveins is referred to in FlyBase by the symbol Dmel\tkv (CG14026, FBgn0003716). It is a protein_coding_gene from Drosophila melanogaster. Its sequence location is 2L:5218996..5271353. It has the cytological map location 25D1-25D2. There is experimental evidence that it has the molecular function</span>: transforming growth factor beta receptor activity, type I; specific transcription…	2	1	1	5primeCassette		88			altexon
FBgn0003731	Egfr	2R	17410510	The gene Epidermal growth factor receptor is referred to in FlyBase by the symbol Dmel\Egfr (CG10079, FBgn0003731). It is a protein_coding_gene from Drosophila melanogaster. Its sequence location is 2R:17410510..17446932. It has the cytological map location 57E9-57F1. Based on sequence similarity, it is predicted to have molecular function</span>: epidermal growth factor receptor activity. There …	2	1	1	5primeCassette		238			altexon
FBgn0003742	tra2	2R	10491857	The gene transformer 2 is referred to in FlyBase by the symbol Dmel\tra2 (CG10128, FBgn0003742). It is a protein_coding_gene from Drosophila melanogaster. Its sequence location is 2R:10489509..10491857. It has the cytological map location 51B6. Based on sequence similarity, it is predicted to have molecular function</span>: mRNA binding. There is experimental evidence that it is involved in the b…	2	1	1	5primeCassette		156			altexon
FBgn0003866	tsh	2L	21828595	The gene teashirt is referred to in FlyBase by the symbol Dmel\tsh (CG1374, FBgn0003866). It is a protein_coding_gene from Drosophila melanogaster. Its sequence location is 2L:21828595..21837013. It has the cytological map location 40A5. There is experimental evidence that it has the molecular function</span>: transcription repressor activity. There is experimental evidence for 11 unique biologic…	2	1	1	5primeCassette		1264			altexon
FBgn0003867	tsl	3R	17608256	The gene torso-like is referred to in FlyBase by the symbol Dmel\tsl (CG6705, FBgn0003867). It is a protein_coding_gene from Drosophila melanogaster. Its sequence location is 3R:17603836..17608256. It has the cytological map location 93F9-93F10. It is reported to have molecular function</span>: torso binding. There is experimental evidence that it is involved in the biological process</span>: ter…	2	1	1						altexon
FBgn0003870	ttk	3R	27539591	The gene tramtrack is referred to in FlyBase by the symbol Dmel\ttk (CG1856, FBgn0003870). It is a protein_coding_gene from Drosophila melanogaster. Its sequence location is 3R:27539591..27561114. It has the cytological map location 100D1. There is experimental evidence that it has the molecular function</span>: protein binding; specific transcriptional repressor activity; chromatin binding; prot…	2	1	1	5primeCassette		401			altexon
FBgn0004101	bs	2R	20231236	The gene blistered is referred to in FlyBase by the symbol Dmel\bs (CG3411, FBgn0004101). It is a protein_coding_gene from Drosophila melanogaster. Its sequence location is 2R:20231236..20263998. It has the cytological map location 60C6-60C7. It is reported to have molecular function</span>: RNA polymerase II transcription factor activity. There is experimental evidence that it is involved in the…	2	1	1		3primeCassette		649		altexon
FBgn0004118	nAcRbeta-96A	3R	20340823	The gene nicotinic Acetylcholine Receptor beta 96A is referred to in FlyBase by the symbol Dmel\nAcRÎ²-96A (CG6798, FBgn0004118). It is a protein_coding_gene from Drosophila melanogaster. Its sequence location is 3R:20334937..20340823. It has the cytological map location 96A5. Based on sequence similarity, it is predicted to have molecular function</span>: nicotinic acetylcholine-activated cation…	2	1	1		13				altexon
FBgn0004133	blow	2R	3474581	The gene blown fuse is referred to in FlyBase by the symbol Dmel\blow (CG1363, FBgn0004133). It is a protein_coding_gene from Drosophila melanogaster. Its sequence location is 2R:3467993..3474581. It has the cytological map location 43E1-43E3. Its molecular function is unknown. There is experimental evidence that it is involved in the biological process</span>: myoblast fusion; mesoderm developme…	2	1	1		163				altexon
FBgn0004362	HmgD	2R	17600836	The gene High mobility group protein D is referred to in FlyBase by the symbol Dmel\HmgD (CG17950, FBgn0004362). It is a protein_coding_gene from Drosophila melanogaster. Its sequence location is 2R:17600836..17604230. It has the cytological map location 57F10. There is experimental evidence that it has the molecular function</span>: DNA bending activity; AT DNA binding. There is experimental evi…	2	1	1		358			207	altexon
FBgn0004369	Ptp99A	3R	25202987	The gene Protein tyrosine phosphatase 99A is referred to in FlyBase by the symbol Dmel\Ptp99A (CG11516, FBgn0004369). It is a protein_coding_gene from Drosophila melanogaster. Its sequence location is 3R:25202987..25312426. It has the cytological map location 99A7-99B1. Based on sequence similarity, it is predicted to have molecular function</span>: protein tyrosine phosphatase activity; transmem…	3	1	1	5primeCassette		760		763	altexon
FBgn0004373	fwd	3L	319880	The gene four wheel drive is referred to in FlyBase by the symbol Dmel\fwd (CG7004, FBgn0004373). It is a protein_coding_gene from Drosophila melanogaster. Its sequence location is 3L:306207..319880. It has the cytological map location 61C1. Based on sequence similarity, it is predicted to have molecular function</span>: 1-phosphatidylinositol 4-kinase activity. There is experimental evidence tha…	3	1	1						altexon
FBgn0004391	shtd	X	15356368	The gene shattered is referred to in FlyBase by the symbol Dmel\shtd (CG9198, FBgn0004391). It is a protein_coding_gene from Drosophila melanogaster. Its sequence location is X:15349572..15356368. It has the cytological map location 13C3-13C4. Its molecular function is unknown. The biological processes in which it is involved are not known. 7 alleles are reported. The phenotypes of these alleles …	2	1	1	5primeCassette		1048			altexon
FBgn0004449	Ten-m	3L	22400987	The gene Tenascin major is referred to in FlyBase by the symbol Dmel\Ten-m (CG5723, FBgn0004449). It is a protein_coding_gene from Drosophila melanogaster. Its sequence location is 3L:22286132..22400987. It has the cytological map location 79D4-79E3. Its molecular function is unknown. There is experimental evidence that it is involved in the biological process</span>: regulation of cell shape; R7…	2	1	1					798
FBgn0004509	Fur1	3R	21298778	The gene Furin 1 is referred to in FlyBase by the symbol Dmel\Fur1 (CG10772, FBgn0004509). It is a protein_coding_gene from Drosophila melanogaster. Its sequence location is 3R:21173090..21298778. It has the cytological map location 96D2-96E1. There is experimental evidence that it has the molecular function</span>: serine-type endopeptidase activity. It is reported to be involved in the biologic…	3	1	1					1131
FBgn0004516	Gad1	3L	4088744	The gene Glutamic acid decarboxylase 1 is referred to in FlyBase by the symbol Dmel\Gad1 (CG14994, FBgn0004516). It is a protein_coding_gene from Drosophila melanogaster. Its sequence location is 3L:4074069..4088744. It has the cytological map location 64A5. There is experimental evidence that it has the molecular function</span>: glutamate decarboxylase activity. There is experimental evidence t…	2	1	1					101
FBgn0004618	gl	3R	14198460	The gene glass is referred to in FlyBase by the symbol Dmel\gl (CG7672, FBgn0004618). It is a protein_coding_gene from Drosophila melanogaster. Its sequence location is 3R:14193649..14198460. It has the cytological map location 91A3. Based on sequence similarity, it is predicted to have molecular function</span>: specific RNA polymerase II transcription factor activity. There is experimental evid…	2	1	1						altexon
FBgn0004638	drk	2R	9390342	The gene downstream of receptor kinase is referred to in FlyBase by the symbol Dmel\drk (CG6033, FBgn0004638). It is a protein_coding_gene from Drosophila melanogaster. Its sequence location is 2R:9382727..9390342. It has the cytological map location 50A13. There is experimental evidence that it has the molecular function</span>: protein binding; SH3/SH2 adaptor activity; sevenless binding. There…	3	1	1						altexon
FBgn0004655	wapl	X	2053016	The gene wings apart-like is referred to in FlyBase by the symbol Dmel\wapl (CG3707, FBgn0004655). It is a protein_coding_gene from Drosophila melanogaster. Its sequence location is X:2044135..2053016. It has the cytological map location 2D4-2D5. An electronic pipeline based on InterPro domains suggests that it has the molecular function</span>: binding. There is experimental evidence that it is …	2	1	1	5primeCassette	22	691			altexon
FBgn0004698	mus210	2R	11198991	The gene mutagen-sensitive 210 is referred to in FlyBase by the symbol Dmel\mus210 (CG8153, FBgn0004698). It is a protein_coding_gene from Drosophila melanogaster. Its sequence location is 2R:11198991..11205347. It has the cytological map location 51F4-51F5. Based on sequence similarity, it is predicted to have molecular function</span>: damaged DNA binding. Based on sequence similarity, it is pr…	2	1	1						altexon
FBgn0004811	fs(2)ltoPP43	2L	19795849	The gene female sterile (2) ltoPP43 is referred to in FlyBase by the symbol Dmel\fs(2)ltoPP43 (CG10528, FBgn0004811). It is a protein_coding_gene from Drosophila melanogaster. Its sequence location is 2L:19792902..19795849. It has the cytological map location 38A3. Its molecular function is unknown. There is experimental evidence that it is involved in the biological process</span>: chorion-conta…	2	1	1		3primeCassette		257		altexon
FBgn0004861	ph-p	X	2030888	The gene polyhomeotic proximal is referred to in FlyBase by the symbol Dmel\ph-p (CG18412, FBgn0004861). It is a protein_coding_gene from Drosophila melanogaster. Its sequence location is X:2020243..2030888. It has the cytological map location 2D2-2D3. There is experimental evidence that it has the molecular function</span>: chaperone binding; protein binding; chromatin binding. There is experime…	2	1	1	310					altexon
FBgn0004865	Eip78C	3L	21220019	The gene Ecdysone-induced protein 78C is referred to in FlyBase by the symbol Dmel\Eip78C (CG18023, FBgn0004865). It is a protein_coding_gene from Drosophila melanogaster. Its sequence location is 3L:21220019..21257721. It has the cytological map location 78C2-78C3. Based on sequence similarity, it is predicted to have molecular function</span>: specific RNA polymerase II transcription factor act…	2	1	1	5primeCassette		1473			altexon
FBgn0004910	Eip63F-1	3L	3935617	The gene Ecdysone-induced protein 63F 1 is referred to in FlyBase by the symbol Dmel\Eip63F-1 (CG15855, FBgn0004910). It is a protein_coding_gene from Drosophila melanogaster. Its sequence location is 3L:3909973..3935617. It has the cytological map location 63F6-64A1. There is experimental evidence that it has the molecular function</span>: calcium ion binding. There is experimental evidence that…	3	1	1	5primeCassette		132			altexon
FBgn0004914	Hnf4	2L	8709038	The gene Hepatocyte nuclear factor 4 is referred to in FlyBase by the symbol Dmel\Hnf4 (CG9310, FBgn0004914). It is a protein_coding_gene from Drosophila melanogaster. Its sequence location is 2L:8687281..8709038. It has the cytological map location 29E4. Based on sequence similarity, it is predicted to have molecular function</span>: transcription factor activity; ligand-dependent nuclear recept…	2	1	1	5primeCassette		553			altexon
FBgn0004919	gol	2R	20971843	The gene goliath is referred to in FlyBase by the symbol Dmel\gol (CG2679, FBgn0004919). It is a protein_coding_gene from Drosophila melanogaster. Its sequence location is 2R:20960150..20971843. It has the cytological map location 60F3. There is experimental evidence that it has the molecular function</span>: transcription regulator activity. There is experimental evidence that it is involved in …	2	1	1		3primeCassette		560		altexon
FBgn0004921	Ggamma1	2R	4788908	The gene G protein Î³ 1 is referred to in FlyBase by the symbol Dmel\GÎ³1 (CG8261, FBgn0004921). It is a protein_coding_gene from Drosophila melanogaster. Its sequence location is 2R:4788908..4792296. It has the cytological map location 44F3-44F5. It is reported to have molecular function</span>: GTPase activity. There is experimental evidence that it is involved in the biological process</span>:…	2	1	1						altexon
FBgn0005558	ey	4	718315	The gene eyeless is referred to in FlyBase by the symbol Dmel\ey (CG1464, FBgn0005558). It is a protein_coding_gene from Drosophila melanogaster. Its sequence location is 4:718315..741787. It has the cytological map location 102D4-102D5. There is experimental evidence that it has the molecular function</span>: protein binding; sequence-specific DNA binding; transcription activator activity. There…	2	1	1					180
FBgn0005631	robo	2R	18588467	The gene roundabout is referred to in FlyBase by the symbol Dmel\robo (CG13521, FBgn0005631). It is a protein_coding_gene from Drosophila melanogaster. Its sequence location is 2R:18580029..18588467. It has the cytological map location 59A2-59A3. There is experimental evidence that it has the molecular function</span>: heparin binding; protein binding. There is experimental evidence for 11 unique…	2	1	1	5primeCassette		85		258
FBgn0005640	Eip63E	3L	3515685	The gene Ecdysone-induced protein 63E is referred to in FlyBase by the symbol Dmel\Eip63E (CG10579, FBgn0005640). It is a protein_coding_gene from Drosophila melanogaster. Its sequence location is 3L:3515685..3610521. It has the cytological map location 63E3-63E5. There is experimental evidence that it has the molecular function</span>: cyclin-dependent protein kinase activity; cyclin binding; pr…	3	1	1	5primeCassette	1972	1144		39	altexon
FBgn0005649	Rox8	3R	19873987	The gene Rox8 is referred to in FlyBase by the symbol Dmel\Rox8 (CG5422, FBgn0005649). It is a protein_coding_gene from Drosophila melanogaster. Its sequence location is 3R:19868924..19873987. It has the cytological map location 95D9-95D10. Based on sequence similarity, it is predicted to have molecular function</span>: mRNA binding. There is experimental evidence that it is involved in the biolo…	2	1	1	5primeCassette		66			altexon
FBgn0005658	Ets65A	3L	6091222	The gene Ets at 65A is referred to in FlyBase by the symbol Dmel\Ets65A (CG7018, FBgn0005658). It is a protein_coding_gene from Drosophila melanogaster. Its sequence location is 3L:6091222..6117030. It has the cytological map location 65A6. Based on sequence similarity, it is predicted to have molecular function</span>: transcription factor activity; DNA binding. Based on sequence similarity, it …	2	1	1	5primeCassette		350			altexon
FBgn0005666	bt	4	745030	The gene bent is referred to in FlyBase by the symbol Dmel\bt (CG32019, FBgn0005666). It is a protein_coding_gene from Drosophila melanogaster. Its sequence location is 4:745030..796707. It has the cytological map location 102D5-102E1. There is experimental evidence that it has the molecular function</span>: structural constituent of muscle. There is experimental evidence that it is involved in t…	2	1	1					33
FBgn0010051	Itp-r83A	3R	1342862	The gene Inositol 1,4,5,-tris-phosphate receptor is referred to in FlyBase by the symbol Dmel\Itp-r83A (CG1063, FBgn0010051). It is a protein_coding_gene from Drosophila melanogaster. Its sequence location is 3R:1342862..1364584. It has the cytological map location 83A7-83B1. There is experimental evidence that it has the molecular function</span>: inositol-1,4,5-trisphosphate receptor activity. …	2	1	1	5primeCassette		749		27
FBgn0010114	hig	2R	5134752	The gene hikaru genki is referred to in FlyBase by the symbol Dmel\hig (CG2040, FBgn0010114). It is a protein_coding_gene from Drosophila melanogaster. Its sequence location is 2R:5115286..5134752. It has the cytological map location 45B7-45B8. Its molecular function is unknown. Based on sequence similarity, it is predicted to be involved in the biological process</span>: cell adhesion. 14 allele…	3	1	1		2				altexon
FBgn0010222	Nmdmc	3R	4876271	The gene NAD-dependent methylenetetrahydrofolate dehydrogenase is referred to in FlyBase by the symbol Dmel\Nmdmc (CG18466, FBgn0010222). It is a protein_coding_gene from Drosophila melanogaster. Its sequence location is 3R:4868226..4876271. It has the cytological map location 85C3. Based on sequence similarity, it is predicted to have molecular function</span>: methylenetetrahydrofolate dehydrog…	2	1	1	5primeCassette		186			altexon
FBgn0010280	Taf4	3L	16106323	The gene TBP-associated factor 4 is referred to in FlyBase by the symbol Dmel\Taf4 (CG5444, FBgn0010280). It is a protein_coding_gene from Drosophila melanogaster. Its sequence location is 3L:16106323..16114468. It has the cytological map location 72D7-72D8. There is experimental evidence that it has the molecular function</span>: general RNA polymerase II transcription factor activity. There is …	3	1	1	5primeCassette		143		210	altexon
FBgn0010300	brat	2L	19133806	The gene brain tumor is referred to in FlyBase by the symbol Dmel\brat (CG10719, FBgn0010300). It is a protein_coding_gene from Drosophila melanogaster. Its sequence location is 2L:19133806..19172572. It has the cytological map location 37C1-37C6. There is experimental evidence that it has the molecular function</span>: protein binding; translation repressor activity. There is experimental eviden…	2	1	1	5primeCassette		471			altexon
FBgn0010315	CycD	X	15803708	The gene Cyclin D is referred to in FlyBase by the symbol Dmel\CycD (CG9096, FBgn0010315). It is a protein_coding_gene from Drosophila melanogaster. Its sequence location is X:15800855..15803708. It has the cytological map location 13F18-14A1. There is experimental evidence that it has the molecular function</span>: protein binding; cyclin-dependent protein kinase regulator activity. There is exp…	2	1	1	5					altexon
FBgn0010348	Arf79F	3L	22865331	The gene ADP ribosylation factor 79F is referred to in FlyBase by the symbol Dmel\Arf79F (CG8385, FBgn0010348). It is a protein_coding_gene from Drosophila melanogaster. Its sequence location is 3L:22861479..22865331. It has the cytological map location 80B1. Based on sequence similarity, it is predicted to have molecular function</span>: GTPase activity; GTP binding. There is experimental eviden…	3	1	1		129				altexon
FBgn0010551	l(2)03709	2R	14706972	The gene lethal (2) 03709 is referred to in FlyBase by the symbol Dmel\l(2)03709 (CG15081, FBgn0010551). It is a protein_coding_gene from Drosophila melanogaster. Its sequence location is 2R:14706972..14709755. It has the cytological map location 55F5-55F6. Its molecular function is unknown. The biological processes in which it is involved are not known. 3 alleles are reported. No phenotypic data…	3	1	1	29					altexon
FBgn0010583	dock	2L	825964	The gene dreadlocks is referred to in FlyBase by the symbol Dmel\dock (CG3727, FBgn0010583). It is a protein_coding_gene from Drosophila melanogaster. Its sequence location is 2L:825964..833245. It has the cytological map location 21E2. There is experimental evidence that it has the molecular function</span>: insulin receptor binding. There is experimental evidence that it is involved in the biol…	2	1	1						altexon
FBgn0010612	l(2)06225	2L	10977006	The gene lethal (2) 06225 is referred to in FlyBase by the symbol Dmel\l(2)06225 (CG6105, FBgn0010612). It is a protein_coding_gene from Drosophila melanogaster. Its sequence location is 2L:10975535..10977006. It has the cytological map location 32C1. Based on sequence similarity, it is predicted to have molecular function</span>: hydrogen-exporting ATPase activity, phosphorylative mechanism. Bas…	2	1	1	5primeCassette		61			altexon
FBgn0010803	Aats-trp	3R	5092670	The gene Tryptophanyl-tRNA synthetase is referred to in FlyBase by the symbol Dmel\Aats-trp (CG9735, FBgn0010803). It is a protein_coding_gene from Drosophila melanogaster. Its sequence location is 3R:5089539..5092670. It has the cytological map location 85D7. There is experimental evidence that it has the molecular function</span>: tryptophan-tRNA ligase activity. There is experimental evidence …	2	1	1		1184				altexon
FBgn0011290	Taf12	3R	7505408	The gene TBP-associated factor 12 is referred to in FlyBase by the symbol Dmel\Taf12 (CG17358, FBgn0011290). It is a protein_coding_gene from Drosophila melanogaster. Its sequence location is 3R:7504099..7505408. It has the cytological map location 86E15. Based on sequence similarity, it is predicted to have molecular function</span>: general RNA polymerase II transcription factor activity. Based…	2	1	1	48					altexon
FBgn0011586	e(r)	X	8800277	The gene enhancer of rudimentary is referred to in FlyBase by the symbol Dmel\e(r) (CG1871, FBgn0011586). It is a protein_coding_gene from Drosophila melanogaster. Its sequence location is X:8798761..8800277. It has the cytological map location 8B7. It is reported to have molecular function</span>: transcription regulator activity. It is reported to be involved in the biological process</span>: r…	2	1	1					84
FBgn0011603	ine	2L	4477024	The gene inebriated is referred to in FlyBase by the symbol Dmel\ine (CG15444, FBgn0011603). It is a protein_coding_gene from Drosophila melanogaster. Its sequence location is 2L:4468000..4477024. It has the cytological map location 24F4. There is experimental evidence that it has the molecular function</span>: osmosensor activity. There is experimental evidence that it is involved in the biologi…	2	1	1	5primeCassette	30	183			altexon
FBgn0011655	Med	3R	27436787	The gene Medea is referred to in FlyBase by the symbol Dmel\Med (CG1775, FBgn0011655). It is a protein_coding_gene from Drosophila melanogaster. Its sequence location is 3R:27436787..27440927. It has the cytological map location 100C7-100D1. There is experimental evidence that it has the molecular function</span>: protein binding. There is experimental evidence for 13 unique biological process</s…	2	1	1					222
FBgn0011708	Syx5	2L	16307359	The gene Syntaxin 5 is referred to in FlyBase by the symbol Dmel\Syx5 (CG4214, FBgn0011708). It is a protein_coding_gene from Drosophila melanogaster. Its sequence location is 2L:16307359..16309273. It has the cytological map location 35F1. There is experimental evidence that it has the molecular function</span>: protein homodimerization activity. There is experimental evidence that it is involve…	2	1	1	11					altexon
FBgn0011742	Arp14D	X	16448001	The gene Actin-related protein 14D is referred to in FlyBase by the symbol Dmel\Arp14D (CG9901, FBgn0011742). It is a protein_coding_gene from Drosophila melanogaster. Its sequence location is X:16442247..16448001. It has the cytological map location 14E1. Based on sequence similarity, it is predicted to have molecular function</span>: structural constituent of cytoskeleton; actin binding. Based …	2	1	1	22	573				altexon
FBgn0011754	PhKgamma	X	11589145	The gene Phosphorylase kinase Î³ is referred to in FlyBase by the symbol Dmel\PhKÎ³ (CG1830, FBgn0011754). It is a protein_coding_gene from Drosophila melanogaster. Its sequence location is X:11589145..11598427. It has the cytological map location 10D5. Based on sequence similarity, it is predicted to have molecular function</span>: phosphorylase kinase activity. There is experimental evidence th…	3	1	1	22					altexon
FBgn0011764	Dsp1	X	16227645	The gene Dorsal switch protein 1 is referred to in FlyBase by the symbol Dmel\Dsp1 (CG12223, FBgn0011764). It is a protein_coding_gene from Drosophila melanogaster. Its sequence location is X:16227645..16232927. It has the cytological map location 14B14-14B15. There is experimental evidence that it has the molecular function</span>: DNA bending activity; transcription factor binding; transcriptio…	2	1	1						altexon
FBgn0012051	CalpA	2R	15312578	The gene Calpain-A is referred to in FlyBase by the symbol Dmel\CalpA (CG7563, FBgn0012051). It is a protein_coding_gene from Drosophila melanogaster. Its sequence location is 2R:15312578..15318068. It has the cytological map location 56D5. It is reported to have molecular function</span>: calcium-dependent cysteine-type endopeptidase activity. There is experimental evidence that it is involved i…	2	1	1		3primeCassette		350		altexon
FBgn0013746	alien	2L	8997375	The gene alien is referred to in FlyBase by the symbol Dmel\alien (CG9556, FBgn0013746). It is a protein_coding_gene from Drosophila melanogaster. Its sequence location is 2L:8994669..8997375. It has the cytological map location 29F7. There is experimental evidence that it has the molecular function</span>: protein binding; protein homodimerization activity. There is experimental evidence that it…	2	1	1		3primeCassette		870		altexon
FBgn0013750	Arf51F	2R	11209979	The gene ADP ribosylation factor 51F is referred to in FlyBase by the symbol Dmel\Arf51F (CG8156, FBgn0013750). It is a protein_coding_gene from Drosophila melanogaster. Its sequence location is 2R:11209979..11212399. It has the cytological map location 51F6. There is experimental evidence that it has the molecular function</span>: NAD(P)+-protein-arginine ADP-ribosyltransferase activity. There i…	2	1	1						altexon
FBgn0013984	InR	3R	17445043	The gene Insulin-like receptor is referred to in FlyBase by the symbol Dmel\InR (CG18402, FBgn0013984). It is a protein_coding_gene from Drosophila melanogaster. Its sequence location is 3R:17398221..17445043. It has the cytological map location 93E4-93E9. There is experimental evidence that it has the molecular function</span>: insulin receptor activity. There is experimental evidence for 21 uni…	2	1	1	285					altexon
FBgn0013987	MAPk-Ak2	X	5658231	The gene MAP kinase activated protein-kinase-2 is referred to in FlyBase by the symbol Dmel\MAPk-Ak2 (CG3086, FBgn0013987). It is a protein_coding_gene from Drosophila melanogaster. Its sequence location is X:5653941..5658231. It has the cytological map location 5B8. Based on sequence similarity, it is predicted to have molecular function</span>: protein kinase activity; protein serine/threonine …	2	1	1						altexon
FBgn0013997	Nrx-IV	3L	12139675	The gene Neurexin IV is referred to in FlyBase by the symbol Dmel\Nrx-IV (CG6827, FBgn0013997). It is a protein_coding_gene from Drosophila melanogaster. Its sequence location is 3L:12139675..12150106. It has the cytological map location 68F6-68F7. Based on sequence similarity, it is predicted to have molecular function</span>: transmembrane receptor activity. There is experimental evidence that …	2	1	1					197
FBgn0014001	Pak	3R	2176620	The gene PAK-kinase is referred to in FlyBase by the symbol Dmel\Pak (CG10295, FBgn0014001). It is a protein_coding_gene from Drosophila melanogaster. Its sequence location is 3R:2176620..2185974. It has the cytological map location 83E4. There is experimental evidence that it has the molecular function</span>: protein serine/threonine kinase activity. There is experimental evidence that it is in…	2	1	1	8	202				altexon
FBgn0014010	Rab5	2L	2365362	The gene Rab-protein 5 is referred to in FlyBase by the symbol Dmel\Rab5 (CG3664, FBgn0014010). It is a protein_coding_gene from Drosophila melanogaster. Its sequence location is 2L:2359546..2365362. It has the cytological map location 22E1. Based on sequence similarity, it is predicted to have molecular function</span>: GTPase activity. There is experimental evidence for 11 unique biological pro…	3	1	1	5primeCassette		81			altexon
FBgn0014141	cher	3R	12948404	The gene cheerio is referred to in FlyBase by the symbol Dmel\cher (CG3937, FBgn0014141). It is a protein_coding_gene from Drosophila melanogaster. Its sequence location is 3R:12917255..12948404. It has the cytological map location 89E12-89E13. Based on sequence similarity, it is predicted to have molecular function</span>: actin binding. There is experimental evidence that it is involved in the …	3	1	1					567
FBgn0014184	Oda	2R	8061767	The gene Ornithine decarboxylase antizyme is referred to in FlyBase by the symbol Dmel\Oda (CG16747, FBgn0014184). It is a protein_coding_gene from Drosophila melanogaster. Its sequence location is 2R:8054077..8061767. It has the cytological map location 48E4. Based on sequence similarity, it is predicted to have molecular function</span>: ornithine decarboxylase inhibitor activity. It is reporte…	2	1	1	5primeCassette		172		368
FBgn0014467	CrebB-17A	X	18260960	The gene Cyclic-AMP response element binding protein B at 17A is referred to in FlyBase by the symbol Dmel\CrebB-17A (CG6103, FBgn0014467). It is a protein_coding_gene from Drosophila melanogaster. Its sequence location is X:18260960..18270084. It has the cytological map location 17A7-17A8. There is experimental evidence that it has the molecular function</span>: sequence-specific DNA binding; RN…	2	1	1	5primeCassette		253		138	altexon
FBgn0015129	DopR2	3R	25485706	The gene Dopamine receptor 2 is referred to in FlyBase by the symbol Dmel\DopR2 (CG18741, FBgn0015129). It is a protein_coding_gene from Drosophila melanogaster. Its sequence location is 3R:25456026..25485706. It has the cytological map location 99B5-99B6. There is experimental evidence that it has the molecular function</span>: dopamine D1 receptor activity. There is experimental evidence that i…	2	1	1		364			174	altexon
FBgn0015218	eIF-4E	3L	9395565	The gene Eukaryotic initiation factor 4E is referred to in FlyBase by the symbol Dmel\eIF-4E (CG4035, FBgn0015218). It is a protein_coding_gene from Drosophila melanogaster. Its sequence location is 3L:9392716..9395565. It has the cytological map location 67B4. There is experimental evidence that it has the molecular function</span>: translation initiation factor activity; RNA cap binding. There …	3	1	1					328
FBgn0015278	Pi3K68D	3L	11783108	The gene Phosphotidylinositol 3 kinase 68D is referred to in FlyBase by the symbol Dmel\Pi3K68D (CG11621, FBgn0015278). It is a protein_coding_gene from Drosophila melanogaster. Its sequence location is 3L:11767750..11783108. It has the cytological map location 68D4-68D6. There is experimental evidence that it has the molecular function</span>: phospholipid binding; phosphatidylinositol-4-phospha…	2	1	1	14	3primeCassette		1254		altexon
FBgn0015320	UbcD2	2L	10768005	The gene Ubiquitin conjugating enzyme 2 is referred to in FlyBase by the symbol Dmel\UbcD2 (CG6720, FBgn0015320). It is a protein_coding_gene from Drosophila melanogaster. Its sequence location is 2L:10765562..10768005. It has the cytological map location 32A5. There is experimental evidence that it has the molecular function</span>: ubiquitin-protein ligase activity. There is experimental eviden…	2	1	1	5primeCassette		349			altexon
FBgn0015565	yin	X	3762359	The gene yin is referred to in FlyBase by the symbol Dmel\yin (CG2913, FBgn0015565). It is a protein_coding_gene from Drosophila melanogaster. Its sequence location is X:3756996..3762359. It has the cytological map location 3F3-3F4. There is experimental evidence that it has the molecular function</span>: proton-dependent oligopeptide secondary active transmembrane transporter activity. An electr…	2	1	1	5primeCassette		388		206
FBgn0015602	BEAF-32	2R	10657975	The gene Boundary element-associated factor of 32kD is referred to in FlyBase by the symbol Dmel\BEAF-32 (CG10159, FBgn0015602). It is a protein_coding_gene from Drosophila melanogaster. Its sequence location is 2R:10657975..10660135. It has the cytological map location 51C2. There is experimental evidence that it has the molecular function</span>: protein binding; DNA binding; chromatin insulato…	2	1	1	5primeCassette		360			altexon
FBgn0015756	RpL9	2L	11004189	The gene Ribosomal protein L9 is referred to in FlyBase by the symbol Dmel\RpL9 (CG6141, FBgn0015756). It is a protein_coding_gene from Drosophila melanogaster. Its sequence location is 2L:11002833..11004189. It has the cytological map location 32C1. Based on sequence similarity, it is predicted to have molecular function</span>: structural constituent of ribosome. There is experimental evidence …	2	1	1	5primeCassette		61			altexon
FBgn0015790	Rab11	3R	16937129	The gene Rab-protein 11 is referred to in FlyBase by the symbol Dmel\Rab11 (CG5771, FBgn0015790). It is a protein_coding_gene from Drosophila melanogaster. Its sequence location is 3R:16937129..16941877. It has the cytological map location 93B12-93B13. Based on sequence similarity, it is predicted to have molecular function</span>: GTPase activity. There is experimental evidence for 18 unique bio…	2	1	1	2	9				altexon
FBgn0015803	rtGEF	2L	20350436	The gene rho-type guanine exchange factor is referred to in FlyBase by the symbol Dmel\rtGEF (CG10043, FBgn0015803). It is a protein_coding_gene from Drosophila melanogaster. Its sequence location is 2L:20350436..20365254. It has the cytological map location 38C5. Based on sequence similarity, it is predicted to have molecular function</span>: guanyl-nucleotide exchange factor activity. There is …	3	1	1	13	3primeCassette		958	2358	altexon
FBgn0015907	bl	2R	16475010	The gene bancal is referred to in FlyBase by the symbol Dmel\bl (CG13425, FBgn0015907). It is a protein_coding_gene from Drosophila melanogaster. Its sequence location is 2R:16475010..16494359. It has the cytological map location 57A6-57A7. It is reported to have molecular function</span>: mRNA binding; transcription factor binding. There is experimental evidence that it is involved in the biolog…	2	1	1					51
FBgn0016031	lama	3L	5349023	The gene lamina ancestor is referred to in FlyBase by the symbol Dmel\lama (CG10645, FBgn0016031). It is a protein_coding_gene from Drosophila melanogaster. Its sequence location is 3L:5336715..5349023. It has the cytological map location 64C12-64C13. Its molecular function is unknown. There is experimental evidence that it is involved in the biological process</span>: inter-male aggressive behav…	2	1	1	5primeCassette		675			altexon
FBgn0016070	smg	3L	8991089	The gene smaug is referred to in FlyBase by the symbol Dmel\smg (CG5263, FBgn0016070). It is a protein_coding_gene from Drosophila melanogaster. Its sequence location is 3L:8983637..8991089. It has the cytological map location 66F1. There is experimental evidence that it has the molecular function</span>: protein binding; translation repressor activity. There is experimental evidence that it is i…	3	1	1	5primeCassette	3primeCassette	411	615	393	altexon
FBgn0016078	wun	2R	5300965	The gene wunen is referred to in FlyBase by the symbol Dmel\wun (CG8804, FBgn0016078). It is a protein_coding_gene from Drosophila melanogaster. Its sequence location is 2R:5288052..5300965. It has the cytological map location 45D3-45D4. There is experimental evidence that it has the molecular function</span>: phosphatase activity. It is reported to be involved in the biological process</span>: g…	2	1	1	5primeCassette		236			altexon
FBgn0016126	CaMKI	4	466120	The gene Calcium/calmodulin-dependent protein kinase I is referred to in FlyBase by the symbol Dmel\CaMKI (CG1495, FBgn0016126). It is a protein_coding_gene from Drosophila melanogaster. Its sequence location is 4:466120..474566. It has the cytological map location 102C1. Based on sequence similarity, it is predicted to have molecular function</span>: calmodulin-dependent protein kinase activity.…	5	1	1	587					altexon
FBgn0016131	Cdk4	2R	12466981	The gene Cyclin-dependent kinase 4 is referred to in FlyBase by the symbol Dmel\Cdk4 (CG5072, FBgn0016131). It is a protein_coding_gene from Drosophila melanogaster. Its sequence location is 2R:12466981..12472953. It has the cytological map location 53C9. There is experimental evidence that it has the molecular function</span>: cyclin-dependent protein kinase activity; cyclin binding. There is ex…	3	1	1	5primeCassette		58			altexon
FBgn0016701	Rab4	2R	13460579	The gene Rab-protein 4 is referred to in FlyBase by the symbol Dmel\Rab4 (CG4921, FBgn0016701). It is a protein_coding_gene from Drosophila melanogaster. Its sequence location is 2R:13460579..13462484. It has the cytological map location 54C9-54C10. Based on sequence similarity, it is predicted to have molecular function</span>: GTPase activity. It is reported to be involved in the biological pro…	2	1	1	12	244				altexon
FBgn0016754	sba	3R	19748695	The gene six-banded is referred to in FlyBase by the symbol Dmel\sba (CG13598, FBgn0016754). It is a protein_coding_gene from Drosophila melanogaster. Its sequence location is 3R:19719889..19748695. It has the cytological map location 95C9-95C12. An electronic pipeline based on InterPro domains suggests that it has the molecular function</span>: DNA binding. The biological processes in which it i…	2	1	1						altexon
FBgn0016797	fz2	3L	19228191	The gene frizzled 2 is referred to in FlyBase by the symbol Dmel\fz2 (CG9739, FBgn0016797). It is a protein_coding_gene from Drosophila melanogaster. Its sequence location is 3L:19135998..19228191. It has the cytological map location 75F9-76A3. There is experimental evidence that it has the molecular function</span>: Wnt receptor activity; protein binding; PDZ domain binding; Wnt-protein binding.…	2	1	1	5primeCassette		287			altexon
FBgn0016926	Pino	2L	1128953	The gene Pinocchio is referred to in FlyBase by the symbol Dmel\Pino (CG4710, FBgn0016926). It is a protein_coding_gene from Drosophila melanogaster. Its sequence location is 2L:1114652..1128953. It has the cytological map location 21F1. Its molecular function is unknown. There is experimental evidence that it is involved in the biological process</span>: olfactory behavior; response to chemical …	2	1	1	5primeCassette		150			altexon
FBgn0016930	smi35A	2L	14234108	The gene smell impaired 35A is referred to in FlyBase by the symbol Dmel\smi35A (CG4551, FBgn0016930). It is a protein_coding_gene from Drosophila melanogaster. Its sequence location is 2L:14184478..14234108. It has the cytological map location 35A1-35A2. There is experimental evidence that it has the molecular function</span>: protein serine/threonine kinase activity; ATP binding; transferase ac…	2	1	1					78
FBgn0019662	qm	3L	7341415	The gene quemao is referred to in FlyBase by the symbol Dmel\qm (CG8593, FBgn0019662). It is a protein_coding_gene from Drosophila melanogaster. Its sequence location is 3L:7341415..7346722. It has the cytological map location 65F5-65F6. Based on sequence similarity, it is predicted to have molecular function</span>: dimethylallyltranstransferase activity; geranyltranstransferase activity; farnes…	2	1	1		167				altexon
FBgn0019947	Psn	3L	20425568	The gene Presenilin is referred to in FlyBase by the symbol Dmel\Psn (CG18803, FBgn0019947). It is a protein_coding_gene from Drosophila melanogaster. Its sequence location is 3L:20425568..20428256. It has the cytological map location 77C3. Its molecular function is unknown. There is experimental evidence that it is involved in the biological process</span>: Notch receptor processing; cell-cell a…	2	1	1		9				altexon
FBgn0019982	Gs1l	2L	4456822	The gene GS1-like is referred to in FlyBase by the symbol Dmel\Gs1l (CG15441, FBgn0019982). It is a protein_coding_gene from Drosophila melanogaster. Its sequence location is 2L:4455221..4456822. It has the cytological map location 24F3. An electronic pipeline based on InterPro domains suggests that it has the molecular function</span>: catalytic activity. An electronic pipeline based on InterPro…	2	1	1					219
FBgn0020224	Cbl	3L	8418045	The gene Cbl is referred to in FlyBase by the symbol Dmel\Cbl (CG7037, FBgn0020224). It is a protein_coding_gene from Drosophila melanogaster. Its sequence location is 3L:8418045..8424324. It has the cytological map location 66C12. It is reported to have molecular function</span>: ligase activity. There is experimental evidence for 11 unique biological process</span> terms, many of which group un…	2	1	1		3primeCassette		2184		altexon
FBgn0020235	ATPsyn-gamma	3R	25574858	The gene ATP synthase-Î³ chain is referred to in FlyBase by the symbol Dmel\ATPsyn-Î³ (CG7610, FBgn0020235). It is a protein_coding_gene from Drosophila melanogaster. Its sequence location is 3R:25573426..25574858. It has the cytological map location 99B10. Based on sequence similarity, it is predicted to have molecular function</span>: hydrogen-exporting ATPase activity, phosphorylative mechanis…	2	1	1	282					altexon
FBgn0020236	ATPCL	2R	11888765	The gene ATP citrate lyase is referred to in FlyBase by the symbol Dmel\ATPCL (CG8322, FBgn0020236). It is a protein_coding_gene from Drosophila melanogaster. Its sequence location is 2R:11879931..11888765. It has the cytological map location 52D9-52D11. Based on sequence similarity, it is predicted to have molecular function</span>: ATP citrate synthase activity. Based on sequence similarity, it…	2	1	1	5primeCassette	1377	73			altexon
FBgn0020249	stck	3R	4182689	The gene steamer duck is referred to in FlyBase by the symbol Dmel\stck (CG7954, FBgn0020249). It is a protein_coding_gene from Drosophila melanogaster. Its sequence location is 3R:4182689..4185745. It has the cytological map location 84F15. An electronic pipeline based on InterPro domains suggests that it has the molecular function</span>: zinc ion binding. There is experimental evidence that it…	2	1	1	5primeCassette		129			altexon
FBgn0020251	sfl	3L	6488780	The gene sulfateless is referred to in FlyBase by the symbol Dmel\sfl (CG8339, FBgn0020251). It is a protein_coding_gene from Drosophila melanogaster. Its sequence location is 3L:6488780..6542333. It has the cytological map location 65B3-65B4. There is experimental evidence that it has the molecular function</span>: [heparan sulfate]-glucosamine N-sulfotransferase activity. There is experimental …	2	1	1					37
FBgn0020278	loco	3R	18465082	The gene locomotion defects is referred to in FlyBase by the symbol Dmel\loco (CG5248, FBgn0020278). It is a protein_coding_gene from Drosophila melanogaster. Its sequence location is 3R:18445690..18465082. It has the cytological map location 94B6-94B8. There is experimental evidence that it has the molecular function</span>: G-protein alpha-subunit binding; GTPase activator activity. There is ex…	3	1	1	5primeCassette		134		327	altexon
FBgn0020279	lig	2R	3955460	The gene lingerer is referred to in FlyBase by the symbol Dmel\lig (CG8715, FBgn0020279). It is a protein_coding_gene from Drosophila melanogaster. Its sequence location is 2R:3955460..3966320. It has the cytological map location 44A4. Its molecular function is unknown. There is experimental evidence that it is involved in the biological process</span>: copulation. 18 alleles are reported. The ph…	3	1	1	26				33	altexon
FBgn0020299	stumps	3R	10402941	The gene stumps is referred to in FlyBase by the symbol Dmel\stumps (CG31317, FBgn0020299). It is a protein_coding_gene from Drosophila melanogaster. Its sequence location is 3R:10402941..10433804. It has the cytological map location 88C6-88C9. Its molecular function is unknown. There is experimental evidence that it is involved in the biological process</span>: tracheal outgrowth, open tracheal …	2	1	1	5primeCassette	3	274			altexon
FBgn0020307	dve	2R	18131468	The gene defective proventriculus is referred to in FlyBase by the symbol Dmel\dve (CG5799, FBgn0020307). It is a protein_coding_gene from Drosophila melanogaster. Its sequence location is 2R:18131468..18173982. It has the cytological map location 58D2. Based on sequence similarity, it is predicted to have molecular function</span>: transcription factor activity; AT DNA binding. There is experime…	2	1	1	5primeCassette		785			altexon
FBgn0020372	TM4SF	2R	19765982	The gene Transmembrane 4 superfamily is referred to in FlyBase by the symbol Dmel\TM4SF (CG11303, FBgn0020372). It is a protein_coding_gene from Drosophila melanogaster. Its sequence location is 2R:19765982..19768383. It has the cytological map location 60A7. Its molecular function is unknown. The biological processes in which it is involved are not known. 5 alleles are reported. No phenotypic da…	2	1	1						altexon
FBgn0020379	Rfx	3R	6203790	The gene Rfx is referred to in FlyBase by the symbol Dmel\Rfx (CG6312, FBgn0020379). It is a protein_coding_gene from Drosophila melanogaster. Its sequence location is 3R:6188233..6203790. It has the cytological map location 86B1-86B2. It is reported to have molecular function</span>: RNA polymerase II transcription factor activity. There is experimental evidence that it is involved in the biolog…	2	1	1					546
FBgn0020445	E23	2L	3355000	The gene Early gene at 23 is referred to in FlyBase by the symbol Dmel\E23 (CG3327, FBgn0020445). It is a protein_coding_gene from Drosophila melanogaster. Its sequence location is 2L:3334871..3355000. It has the cytological map location 23E4-23E5. Based on sequence similarity, it is predicted to have molecular function</span>: ATPase activity, coupled to transmembrane movement of substances. The…	2	1	1	5primeCassette		527			altexon
FBgn0020493	Dad	3R	12879729	The gene Daughters against dpp is referred to in FlyBase by the symbol Dmel\Dad (CG5201, FBgn0020493). It is a protein_coding_gene from Drosophila melanogaster. Its sequence location is 3R:12879729..12896135. It has the cytological map location 89E11. There is experimental evidence that it has the molecular function</span>: transforming growth factor beta receptor, inhibitory cytoplasmic mediator…	2	1	1	5primeCassette		356			altexon
FBgn0020521	pio	2R	20468772	The gene piopio is referred to in FlyBase by the symbol Dmel\pio (CG3541, FBgn0020521). It is a protein_coding_gene from Drosophila melanogaster. Its sequence location is 2R:20468772..20485385. It has the cytological map location 60D7-60D8. Its molecular function is unknown. There is experimental evidence that it is involved in the biological process</span>: apposition of dorsal and ventral imagi…	2	1	1	14					altexon
FBgn0020611	Vha44	2R	12224142	The gene Vacuolar H<sup>+</sup> ATPase 44kD C subunit is referred to in FlyBase by the symbol Dmel\Vha44 (CG8048, FBgn0020611). It is a protein_coding_gene from Drosophila melanogaster. Its sequence location is 2R:12212318..12224142. It has the cytological map location 53B5-53C1. Based on sequence similarity, it is predicted to have molecular function</span>: hydrogen-exporting ATPase activity, p…	2	1	1					982
FBgn0020620	RN-tre	2R	9878191	The gene tre oncogene-related protein is referred to in FlyBase by the symbol Dmel\RN-tre (CG8085, FBgn0020620). It is a protein_coding_gene from Drosophila melanogaster. Its sequence location is 2R:9872320..9878191. It has the cytological map location 50C23. An electronic pipeline based on InterPro domains suggests that it has the molecular function</span>: Rab GTPase activator activity. An elec…	3	1	1		3primeCassette		1046		altexon
FBgn0020653	Trxr-1	X	8136517	The gene Thioredoxin reductase-1 is referred to in FlyBase by the symbol Dmel\Trxr-1 (CG2151, FBgn0020653). It is a protein_coding_gene from Drosophila melanogaster. Its sequence location is X:8136517..8142072. It has the cytological map location 7D22-7E1. There is experimental evidence that it has the molecular function</span>: glutathione-disulfide reductase activity; thioredoxin-disulfide redu…	2	1	1	5primeCassette		248			altexon
FBgn0020887	Su(z)12	3L	19916500	The gene Su(z)12 is referred to in FlyBase by the symbol Dmel\Su(z)12 (CG8013, FBgn0020887). It is a protein_coding_gene from Drosophila melanogaster. Its sequence location is 3L:19911337..19916500. It has the cytological map location 76D4. There is experimental evidence that it has the molecular function</span>: protein binding. There is experimental evidence that it is involved in the biologica…	2	1	1	193	49			162	altexon
FBgn0022029	l(2)k01209	2R	13307938	The gene lethal (2) k01209 is referred to in FlyBase by the symbol Dmel\l(2)k01209 (CG4798, FBgn0022029). It is a protein_coding_gene from Drosophila melanogaster. Its sequence location is 2R:13307938..13313192. It has the cytological map location 54B7. Based on sequence similarity, it is predicted to have molecular function</span>: uridine kinase activity. An electronic pipeline based on InterPr…	2	1	1					770
FBgn0022153	l(2)k05819	2L	4394198	The gene lethal (2) k05819 is referred to in FlyBase by the symbol Dmel\l(2)k05819 (CG3054, FBgn0022153). It is a protein_coding_gene from Drosophila melanogaster. Its sequence location is 2L:4394198..4400109. It has the cytological map location 24E5-24F1. An electronic pipeline based on InterPro domains suggests that it has the molecular function</span>: ATPase activity, coupled to transmembrane…	2	1	1	5primeCassette		292			altexon
FBgn0022201	milt	2L	7037998	The gene milton is referred to in FlyBase by the symbol Dmel\milt (CG13777, FBgn0022201). It is a protein_coding_gene from Drosophila melanogaster. Its sequence location is 2L:7037998..7056011. It has the cytological map location 27D5-27D7. There is experimental evidence that it has the molecular function</span>: protein binding. There is experimental evidence that it is involved in the biologica…	2	1	1	5primeCassette		281			altexon
FBgn0022238	lolal	2R	14045697	The gene lola like is referred to in FlyBase by the symbol Dmel\lolal (CG5738, FBgn0022238). It is a protein_coding_gene from Drosophila melanogaster. Its sequence location is 2R:14042350..14045697. It has the cytological map location 55B9. Based on sequence similarity, it is predicted to have molecular function</span>: specific RNA polymerase II transcription factor activity. There is experiment…	3	1	1	5primeCassette		41			altexon
FBgn0022361	Pur-alpha	4	578608	The gene Purine-rich binding protein-Î± is referred to in FlyBase by the symbol Dmel\Pur-Î± (CG1507, FBgn0022361). It is a protein_coding_gene from Drosophila melanogaster. Its sequence location is 4:578608..586562. It has the cytological map location 102C5. Based on sequence similarity, it is predicted to have molecular function</span>: transcription activator activity. The biological processes …	4	1	1	175					altexon
FBgn0022709	Adk1	3L	12197182	The gene Adenylate kinase-1 is referred to in FlyBase by the symbol Dmel\Adk1 (CG17146, FBgn0022709). It is a protein_coding_gene from Drosophila melanogaster. Its sequence location is 3L:12193496..12197182. It has the cytological map location 69A2. Based on sequence similarity, it is predicted to have molecular function</span>: uridine kinase activity. An electronic pipeline based on InterPro do…	2	1	1					84
FBgn0022893	Df31	2L	21629928	The gene Decondensation factor 31 is referred to in FlyBase by the symbol Dmel\Df31 (CG2207, FBgn0022893). It is a protein_coding_gene from Drosophila melanogaster. Its sequence location is 2L:21626590..21629928. It has the cytological map location 39E3. There is experimental evidence that it has the molecular function</span>: histone binding. There is experimental evidence that it is involved in…	2	1	1		267				altexon
FBgn0023000	mth	3L	347168	The gene methuselah is referred to in FlyBase by the symbol Dmel\mth (CG6936, FBgn0023000). It is a protein_coding_gene from Drosophila melanogaster. Its sequence location is 3L:343378..347168. It has the cytological map location 61C1. Based on sequence similarity, it is predicted to have molecular function</span>: G-protein coupled receptor activity. There is experimental evidence that it is inv…	2	1	1	5primeCassette		31		95
FBgn0023023	CRMP	3R	1396830	The gene Collapsin Response Mediator Protein is referred to in FlyBase by the symbol Dmel\CRMP (CG1411, FBgn0023023). It is a protein_coding_gene from Drosophila melanogaster. Its sequence location is 3R:1396830..1404913. It has the cytological map location 83B2. Based on sequence similarity, it is predicted to have molecular function</span>: dihydropyrimidinase activity. There is experimental ev…	2	1	1						altexon
FBgn0023169	SNF1A	X	1269580	The gene SNF1A/AMP-activated protein kinase is referred to in FlyBase by the symbol Dmel\SNF1A (CG3051, FBgn0023169). It is a protein_coding_gene from Drosophila melanogaster. Its sequence location is X:1269580..1272890. It has the cytological map location 2A1. There is experimental evidence that it has the molecular function</span>: AMP-activated protein kinase activity. There is experimental ev…	2	1	1						altexon
FBgn0023172	RhoGEF2	2R	12914746	The gene RhoGEF2 is referred to in FlyBase by the symbol Dmel\RhoGEF2 (CG9635, FBgn0023172). It is a protein_coding_gene from Drosophila melanogaster. Its sequence location is 2R:12914746..12932161. It has the cytological map location 53E4-53F1. Based on sequence similarity, it is predicted to have molecular function</span>: diacylglycerol binding; Rho guanyl-nucleotide exchange factor activity. …	2	1	1					1062
FBgn0023211	Elongin-C	2R	15333797	The gene Elongin C is referred to in FlyBase by the symbol Dmel\Elongin-C (CG9291, FBgn0023211). It is a protein_coding_gene from Drosophila melanogaster. Its sequence location is 2R:15332590..15333797. It has the cytological map location 56D7. Based on sequence similarity, it is predicted to have molecular function</span>: transcription elongation regulator activity. There is experimental eviden…	2	1	1	56					altexon
FBgn0023215	Mnt	X	3565834	The gene Mnt is referred to in FlyBase by the symbol Dmel\Mnt (CG13316, FBgn0023215). It is a protein_coding_gene from Drosophila melanogaster. Its sequence location is X:3565834..3594813. It has the cytological map location 3E4-3E5. There is experimental evidence that it has the molecular function</span>: protein binding; sequence-specific DNA binding; transcription repressor activity. There is …	3	1	1	5primeCassette		239			altexon
FBgn0023388	Dap160	2L	21142353	The gene Dynamin associated protein 160 is referred to in FlyBase by the symbol Dmel\Dap160 (CG1099, FBgn0023388). It is a protein_coding_gene from Drosophila melanogaster. Its sequence location is 2L:21137131..21142353. It has the cytological map location 39A4. There is experimental evidence that it has the molecular function</span>: protein binding. There is experimental evidence that it is inv…	2	1	1					249
FBgn0023441	fus	2R	11564198	The gene fusilli is referred to in FlyBase by the symbol Dmel\fus (CG8205, FBgn0023441). It is a protein_coding_gene from Drosophila melanogaster. Its sequence location is 2R:11544823..11564198. It has the cytological map location 52B3-52B5. Based on sequence similarity, it is predicted to have molecular function</span>: mRNA binding. There is experimental evidence that it is involved in the biol…	3	1	1		3primeCassette		1084		altexon
FBgn0023479	Tequila	3L	9067745	The gene Tequila is referred to in FlyBase by the symbol Dmel\Tequila (CG4821, FBgn0023479). It is a protein_coding_gene from Drosophila melanogaster. Its sequence location is 3L:9067745..9085231. It has the cytological map location 66F4-66F5. Based on sequence similarity, it is predicted to have molecular function</span>: serine-type endopeptidase activity. There is experimental evidence that it…	2	1	1	5primeCassette		185		465	altexon
FBgn0023537	CG17896	X	387527	This gene is referred to in FlyBase by the symbol Dmel\CG17896 (CG17896, FBgn0023537). It is a protein_coding_gene from Drosophila melanogaster. Its sequence location is X:384820..387527. It has the cytological map location 1B5. Based on sequence similarity, it is predicted to have molecular function</span>: methylmalonate-semialdehyde dehydrogenase (acylating) activity. Based on sequence similar…	2	1	1	5primeCassette		107		281
FBgn0024189	sns	2R	4686022	The gene sticks and stones is referred to in FlyBase by the symbol Dmel\sns (CG33141, FBgn0024189). It is a protein_coding_gene from Drosophila melanogaster. Its sequence location is 2R:4686022..4743142. It has the cytological map location 44F1. Its molecular function is unknown. There is experimental evidence that it is involved in the biological process</span>: myoblast fusion; larval visceral …	2	1	1					189
FBgn0024244	drm	2L	3539251	The gene drumstick is referred to in FlyBase by the symbol Dmel\drm (CG10016, FBgn0024244). It is a protein_coding_gene from Drosophila melanogaster. Its sequence location is 2L:3539251..3548086. It has the cytological map location 24A1. An electronic pipeline based on InterPro domains suggests that it has the molecular function</span>: zinc ion binding. There is experimental evidence that it is …	2	1	1	5primeCassette		141			altexon
FBgn0024315	Picot	2R	12555183	The gene Picot is referred to in FlyBase by the symbol Dmel\Picot (CG8098, FBgn0024315). It is a protein_coding_gene from Drosophila melanogaster. Its sequence location is 2R:12542820..12555183. It has the cytological map location 53C15-53D1. Based on sequence similarity, it is predicted to have molecular function</span>: high affinity inorganic phosphate:sodium symporter activity. It is reported…	2	1	1	5primeCassette		127			altexon
FBgn0024321	NK7.1	3R	10198673	The gene NK7.1 is referred to in FlyBase by the symbol Dmel\NK7.1 (CG8524, FBgn0024321). It is a protein_coding_gene from Drosophila melanogaster. Its sequence location is 3R:10155846..10198673. It has the cytological map location 88B4-88B6. Based on sequence similarity, it is predicted to have molecular function</span>: transcription factor activity. Based on sequence similarity, it is predicted…	2	1	1	5primeCassette		405		99
FBgn0024329	Mekk1	3R	14569280	The gene Mekk1 is referred to in FlyBase by the symbol Dmel\Mekk1 (CG7717, FBgn0024329). It is a protein_coding_gene from Drosophila melanogaster. Its sequence location is 3R:14558755..14569280. It has the cytological map location 91C5. There is experimental evidence that it has the molecular function</span>: MAP kinase kinase kinase activity. There is experimental evidence that it is involved in…	2	1	1	5primeCassette	73	558			altexon
FBgn0024330	MED6	3R	5594706	The gene Mediator complex subunit 6 is referred to in FlyBase by the symbol Dmel\MED6 (CG9473, FBgn0024330). It is a protein_coding_gene from Drosophila melanogaster. Its sequence location is 3R:5591753..5594706. It has the cytological map location 85E8. There is experimental evidence that it has the molecular function</span>: protein binding; RNA polymerase II transcription mediator activity; tr…	2	1	1	5primeCassette		126			altexon
FBgn0024733	Qm	3L	23088569	The gene Qm is referred to in FlyBase by the symbol Dmel\Qm (CG17521, FBgn0024733). It is a protein_coding_gene from Drosophila melanogaster. Its sequence location is 3L:23086736..23088569. It has the cytological map location 80D1. Based on sequence similarity, it is predicted to have molecular function</span>: structural constituent of ribosome. There is experimental evidence that it is involved…	2	1	1	2					altexon
FBgn0024754	Flo	2R	11456907	The gene flotillin is referred to in FlyBase by the symbol Dmel\Flo (CG8200, FBgn0024754). It is a protein_coding_gene from Drosophila melanogaster. Its sequence location is 2R:11453772..11456907. It has the cytological map location 52A13. There is experimental evidence that it has the molecular function</span>: structural molecule activity. The biological processes in which it is involved are no…	2	1	1					12
FBgn0024944	Oamb	3R	16540263	The gene Octopamine receptor in mushroom bodies is referred to in FlyBase by the symbol Dmel\Oamb (CG3856, FBgn0024944). It is a protein_coding_gene from Drosophila melanogaster. Its sequence location is 3R:16514740..16540263. It has the cytological map location 92F6-92F8. There is experimental evidence that it has the molecular function</span>: octopamine receptor activity. There is experimental…	2	1	1		3primeCassette		2090		altexon
FBgn0024947	NTPase	2L	2885850	The gene NTPase is referred to in FlyBase by the symbol Dmel\NTPase (CG3059, FBgn0024947). It is a protein_coding_gene from Drosophila melanogaster. Its sequence location is 2L:2880704..2885850. It has the cytological map location 23C1. There is experimental evidence that it has the molecular function</span>: guanosine-diphosphatase activity; uridine-diphosphatase activity. The biological process…	3	1	1	5primeCassette	1	216		194	altexon
FBgn0024963	GluClalpha	3R	15556681	The gene GluClÎ± is referred to in FlyBase by the symbol Dmel\GluClÎ± (CG7535, FBgn0024963). It is a protein_coding_gene from Drosophila melanogaster. Its sequence location is 3R:15556681..15601162. It has the cytological map location 92B1-92B2. There is experimental evidence that it has the molecular function</span>: extracellular-glutamate-gated chloride channel activity. An electronic pipeline…	2	1	1		3primeCassette		523	68	altexon
FBgn0025390	Mur2B	X	1512188	The gene Mucin related 2B is referred to in FlyBase by the symbol Dmel\Mur2B (CG14796, FBgn0025390). It is a protein_coding_gene from Drosophila melanogaster. Its sequence location is X:1417933..1512188. It has the cytological map location 2B2-2B4. An electronic pipeline based on InterPro domains suggests that it has the molecular function</span>: chitin binding. An electronic pipeline based on I…	2	1	1		3primeCassette		419		altexon
FBgn0025455	CycT	3L	17550888	The gene Cyclin T is referred to in FlyBase by the symbol Dmel\CycT (CG6292, FBgn0025455). It is a protein_coding_gene from Drosophila melanogaster. Its sequence location is 3L:17545613..17550888. It has the cytological map location 74D4. There is experimental evidence that it has the molecular function</span>: transcription elongation regulator activity. There is experimental evidence that it is…	2	1	1	5primeCassette		1293			altexon
FBgn0025633	CG13366	X	514228	This gene is referred to in FlyBase by the symbol Dmel\CG13366 (CG13366, FBgn0025633). It is a protein_coding_gene from Drosophila melanogaster. Its sequence location is X:504579..514228. It has the cytological map location 1B11-1B12. Its molecular function is unknown. The biological processes in which it is involved are not known. 15 alleles are reported. No phenotypic data is available. It has …	2	1	1	5primeCassette		157			altexon
FBgn0025637	skpA	X	550105	The gene skpA is referred to in FlyBase by the symbol Dmel\skpA (CG16983, FBgn0025637). It is a protein_coding_gene from Drosophila melanogaster. Its sequence location is X:550105..551937. It has the cytological map location 1B14. An electronic pipeline based on InterPro domains suggests that it has the molecular function</span>: protein binding. There is experimental evidence that it is involved…	2	1	1	18					altexon
FBgn0025641	DAAM	X	1216427	The gene Dishevelled Associated Activator of Morphogenesis is referred to in FlyBase by the symbol Dmel\DAAM (CG14622, FBgn0025641). It is a protein_coding_gene from Drosophila melanogaster. Its sequence location is X:1183746..1216427. It has the cytological map location 1F2-1F3. Based on sequence similarity, it is predicted to have molecular function</span>: actin binding. There is experimental …	2	1	1	5primeCassette		195		204	altexon
FBgn0025643	CG3588	X	2813803	This gene is referred to in FlyBase by the symbol Dmel\CG3588 (CG3588, FBgn0025643). It is a protein_coding_gene from Drosophila melanogaster. Its sequence location is X:2813803..2818416. It has the cytological map location 3C3. Its molecular function is unknown. The biological processes in which it is involved are not known. 2 alleles are reported. No phenotypic data is available. It has 4 annot…	2	1	1	5primeCassette		85			altexon
FBgn0025676	CkIIalpha-i3	3L	710455	The gene CKII-Î± subunit interactor-3 is referred to in FlyBase by the symbol Dmel\CkIIÎ±-i3 (CG3217, FBgn0025676). It is a protein_coding_gene from Drosophila melanogaster. Its sequence location is 3L:708653..710455. It has the cytological map location 61C8. Its molecular function is unknown. The biological processes in which it is involved are not known. 6 alleles are reported. No phenotypic da…	2	1	1	98					altexon
FBgn0025702	srpk79D	3L	22267109	The gene serine-arginine protein kinase at 79D is referred to in FlyBase by the symbol Dmel\srpk79D (CG11489, FBgn0025702). It is a protein_coding_gene from Drosophila melanogaster. Its sequence location is 3L:22267109..22277436. It has the cytological map location 79D4. Based on sequence similarity, it is predicted to have molecular function</span>: protein kinase activity; protein serine/threon…	2	1	1	5primeCassette		1430		944	altexon
FBgn0025725	alphaCop	3L	1645235	The gene Î±-coatomer protein is referred to in FlyBase by the symbol Dmel\Î±Cop (CG7961, FBgn0025725). It is a protein_coding_gene from Drosophila melanogaster. Its sequence location is 3L:1641066..1645235. It has the cytological map location 62A9. An electronic pipeline based on InterPro domains suggests that it has the molecular function</span>: protein binding; structural molecule activity. Th…	2	1	1	12					altexon
FBgn0025777	homer	2L	6723355	The gene homer is referred to in FlyBase by the symbol Dmel\homer (CG11324, FBgn0025777). It is a protein_coding_gene from Drosophila melanogaster. Its sequence location is 2L:6720395..6723355. It has the cytological map location 27A1. Its molecular function is unknown. There is experimental evidence that it is involved in the biological process</span>: adult behavior; response to ethanol; regula…	2	1	1	5primeCassette		163		62
FBgn0026147	CG16833	2L	10989305	This gene is referred to in FlyBase by the symbol Dmel\CG16833 (CG16833, FBgn0026147). It is a protein_coding_gene from Drosophila melanogaster. Its sequence location is 2L:10989305..10997700. It has the cytological map location 32C1. Based on sequence similarity, it is predicted to have molecular function</span>: tubulin-tyrosine ligase activity. An electronic pipeline based on InterPro domains …	2	1	1					810	altexon
FBgn0026160	tna	3L	10828628	The gene tonalli is referred to in FlyBase by the symbol Dmel\tna (CG7958, FBgn0026160). It is a protein_coding_gene from Drosophila melanogaster. Its sequence location is 3L:10828628..10867746. It has the cytological map location 67F1. An electronic pipeline based on InterPro domains suggests that it has the molecular function</span>: zinc ion binding. There is experimental evidence that it is i…	2	1	1	512					altexon
FBgn0026189	prominin-like	3L	3127723	The gene prominin-like is referred to in FlyBase by the symbol Dmel\prominin-like (CG7740, FBgn0026189). It is a protein_coding_gene from Drosophila melanogaster. Its sequence location is 3L:3115335..3127723. It has the cytological map location 63B2-63B3. Its molecular function is unknown. The biological processes in which it is involved are not known. 8 alleles are reported. No phenotypic data i…	3	1	1	5primeCassette		71			altexon
FBgn0026238	gus	2R	1015817	The gene gustavus is referred to in FlyBase by the symbol Dmel\gus (CG2944, FBgn0026238). It is a protein_coding_gene from Drosophila melanogaster. Its sequence location is 2R:1004715..1015817. It has the cytological map location 41D3. Its molecular function is unknown. There is experimental evidence that it is involved in the biological process</span>: oocyte anterior/posterior axis specificatio…	2	1	1	5primeCassette		87			altexon
FBgn0026263	bip1	3L	8051811	The gene bip1 is referred to in FlyBase by the symbol Dmel\bip1 (CG7574, FBgn0026263). It is a protein_coding_gene from Drosophila melanogaster. Its sequence location is 3L:8047433..8051811. It has the cytological map location 66B3. It is reported to have molecular function</span>: protein binding. The biological processes in which it is involved are not known. 12 alleles are reported. No phenoty…	2	1	1	5primeCassette		251		64	altexon
FBgn0026376	Rgl	3L	13918348	The gene Ral guanine nucleotide exchange factor is referred to in FlyBase by the symbol Dmel\Rgl (CG8865, FBgn0026376). It is a protein_coding_gene from Drosophila melanogaster. Its sequence location is 3L:13899991..13918348. It has the cytological map location 70C5. Based on sequence similarity, it is predicted to have molecular function</span>: Ral guanyl-nucleotide exchange factor activity. An…	2	1	1	5primeCassette	4	250		754	altexon
FBgn0026379	Pten	2L	10261017	The gene Pten is referred to in FlyBase by the symbol Dmel\Pten (CG5671, FBgn0026379). It is a protein_coding_gene from Drosophila melanogaster. Its sequence location is 2L:10256319..10261017. It has the cytological map location 31B1. There is experimental evidence that it has the molecular function</span>: phosphoprotein phosphatase activity; phosphatidylinositol-3,4,5-trisphosphate 3-phosphatas…	4	1	1	5primeCassette		276		322	altexon
FBgn0026430	Grip84	X	19459629	The gene gamma-tubulin ring protein 84 is referred to in FlyBase by the symbol Dmel\Grip84 (CG3917, FBgn0026430). It is a protein_coding_gene from Drosophila melanogaster. Its sequence location is X:19455373..19459629. It has the cytological map location 18D1. There is experimental evidence that it has the molecular function</span>: microtubule minus-end binding; gamma-tubulin binding. There is e…	2	1	1						altexon
FBgn0026438	Eaat2	2L	744395	The gene Excitatory amino acid transporter 2 is referred to in FlyBase by the symbol Dmel\Eaat2 (CG3159, FBgn0026438). It is a protein_coding_gene from Drosophila melanogaster. Its sequence location is 2L:737212..744395. It has the cytological map location 21E2. There is experimental evidence that it has the molecular function</span>: L-aspartate transmembrane transporter activity; taurine:sodium…	2	1	1	5primeCassette		200			altexon
FBgn0026533	Dek	2R	12743726	The gene Dek is referred to in FlyBase by the symbol Dmel\Dek (CG5935, FBgn0026533). It is a protein_coding_gene from Drosophila melanogaster. Its sequence location is 2R:12743726..12747861. It has the cytological map location 53D14. An electronic pipeline based on InterPro domains suggests that it has the molecular function</span>: nucleic acid binding. It is reported to be involved in the biolo…	2	1	1	5primeCassette		83			altexon
FBgn0026573	CG8290	2R	7858179	This gene is referred to in FlyBase by the symbol Dmel\CG8290 (CG8290, FBgn0026573). It is a protein_coding_gene from Drosophila melanogaster. Its sequence location is 2R:7858179..7865236. It has the cytological map location 48D5. Based on sequence similarity, it is predicted to have molecular function</span>: general RNA polymerase II transcription factor activity. The biological processes in wh…	2	1	1		3primeCassette		2376	679
FBgn0026575	hang	X	16316877	The gene hangover is referred to in FlyBase by the symbol Dmel\hang (CG32575, FBgn0026575). It is a protein_coding_gene from Drosophila melanogaster. Its sequence location is X:16316877..16331531. It has the cytological map location 14C4. Based on sequence similarity, it is predicted to have molecular function</span>: nucleic acid binding. There is experimental evidence that it is involved in the…	2	1	1						altexon
FBgn0026597	Axn	3R	25848566	The gene Axin is referred to in FlyBase by the symbol Dmel\Axn (CG7926, FBgn0026597). It is a protein_coding_gene from Drosophila melanogaster. Its sequence location is 3R:25848566..25861033. It has the cytological map location 99D2-99D3. It is reported to have molecular function</span>: beta-catenin binding. There is experimental evidence that it is involved in the biological process</span>: eye…	2	1	1		392			138	altexon
FBgn0026619	Taz	2R	8643915	The gene Tafazzin is referred to in FlyBase by the symbol Dmel\Taz (CG8766, FBgn0026619). It is a protein_coding_gene from Drosophila melanogaster. Its sequence location is 2R:8640531..8643915. It has the cytological map location 49C2. There is experimental evidence that it has the molecular function</span>: acyltransferase activity; phosphatidylcholine:cardiolipin O-linoleoyltransferase activity…	3	1	1	5primeCassette	193	328		70	altexon
FBgn0026737	CG6171	3R	11189653	This gene is referred to in FlyBase by the symbol Dmel\CG6171 (CG6171, FBgn0026737). It is a protein_coding_gene from Drosophila melanogaster. Its sequence location is 3R:11188514..11189653. It has the cytological map location 88F1. Its molecular function is unknown. The biological processes in which it is involved are not known. 4 alleles are reported. No phenotypic data is available. It has 2 a…	2	1	1						altexon
FBgn0026749	Yippee	X	13281427	The gene Yippee is referred to in FlyBase by the symbol Dmel\Yippee (CG1989, FBgn0026749). It is a protein_coding_gene from Drosophila melanogaster. Its sequence location is X:13279947..13281427. It has the cytological map location 11F1. It is reported to have molecular function</span>: zinc ion binding; metal ion binding. The biological processes in which it is involved are not known. 3 alleles …	2	1	1						altexon
FBgn0027066	Eb1	2R	2636697	The gene Eb1 is referred to in FlyBase by the symbol Dmel\Eb1 (CG3265, FBgn0027066). It is a protein_coding_gene from Drosophila melanogaster. Its sequence location is 2R:2636697..2643542. It has the cytological map location 42C8. There is experimental evidence that it has the molecular function</span>: protein binding. There is experimental evidence that it is involved in the biological process<…	2	1	1					277	altexon
FBgn0027081	Aats-thr	2L	12103734	The gene Threonyl-tRNA synthetase is referred to in FlyBase by the symbol Dmel\Aats-thr (CG5353, FBgn0027081). It is a protein_coding_gene from Drosophila melanogaster. Its sequence location is 2L:12103734..12106894. It has the cytological map location 33C4. Based on sequence similarity, it is predicted to have molecular function</span>: threonine-tRNA ligase activity. There is experimental evide…	2	1	1	52					altexon
FBgn0027084	Aats-lys	X	9502917	The gene Lysyl-tRNA synthetase is referred to in FlyBase by the symbol Dmel\Aats-lys (CG12141, FBgn0027084). It is a protein_coding_gene from Drosophila melanogaster. Its sequence location is X:9500396..9502917. It has the cytological map location 8F1. Based on sequence similarity, it is predicted to have molecular function</span>: lysine-tRNA ligase activity. Based on sequence similarity, it is …	2	1	1	5primeCassette		166			altexon
FBgn0027086	Aats-ile	3L	22281762	The gene Isoleucyl-tRNA synthetase is referred to in FlyBase by the symbol Dmel\Aats-ile (CG11471, FBgn0027086). It is a protein_coding_gene from Drosophila melanogaster. Its sequence location is 3L:22281762..22285918. It has the cytological map location 79D4. Based on sequence similarity, it is predicted to have molecular function</span>: isoleucine-tRNA ligase activity. Based on sequence simila…	2	1	1		8				altexon
FBgn0027280	l(1)G0193	X	7841039	The gene lethal (1) G0193 is referred to in FlyBase by the symbol Dmel\l(1)G0193 (CG2206, FBgn0027280). It is a protein_coding_gene from Drosophila melanogaster. Its sequence location is X:7835510..7841039. It has the cytological map location 7C9. Its molecular function is unknown. The biological processes in which it is involved are not known. 11 alleles are reported. No phenotypic data is avail…	2	1	1	5primeCassette		600		165	altexon
FBgn0027287	Gmap	X	15380955	The gene Golgi microtubule-associated protein is referred to in FlyBase by the symbol Dmel\Gmap (CG33206, FBgn0027287). It is a protein_coding_gene from Drosophila melanogaster. Its sequence location is X:15380955..15404822. It has the cytological map location 13C5-13C7. Its molecular function is unknown. The biological processes in which it is involved are not known. 23 alleles are reported. The…	2	1	1	5primeCassette		554			altexon
FBgn0027335	Rip11	X	18541596	The gene Rab11 interacting protein is referred to in FlyBase by the symbol Dmel\Rip11 (CG6606, FBgn0027335). It is a protein_coding_gene from Drosophila melanogaster. Its sequence location is X:18529675..18541596. It has the cytological map location 17C6-17C7. Its molecular function is unknown. There is experimental evidence that it is involved in the biological process</span>: rhabdomere develop…	2	1	1					260	altexon
FBgn0027515	CG7115	2L	7821534	This gene is referred to in FlyBase by the symbol Dmel\CG7115 (CG7115, FBgn0027515). It is a protein_coding_gene from Drosophila melanogaster. Its sequence location is 2L:7821534..7825376. It has the cytological map location 28D1. Based on sequence similarity, it is predicted to have molecular function</span>: protein serine/threonine phosphatase activity. There is experimental evidence that it i…	2	1	1						altexon
FBgn0027532	CG7139	3L	22064954	This gene is referred to in FlyBase by the symbol Dmel\CG7139 (CG7139, FBgn0027532). It is a protein_coding_gene from Drosophila melanogaster. Its sequence location is 3L:22060344..22064954. It has the cytological map location 79B2. Its molecular function is unknown. The biological processes in which it is involved are not known. 2 alleles are reported. No phenotypic data is available. It has 2 a…	2	1	1	5primeCassette	26	203			altexon
FBgn0027561	CG18659	2R	5019486	This gene is referred to in FlyBase by the symbol Dmel\CG18659 (CG18659, FBgn0027561). It is a protein_coding_gene from Drosophila melanogaster. Its sequence location is 2R:5010809..5019486. It has the cytological map location 45A9-45A10. Its molecular function is unknown. The biological processes in which it is involved are not known. 3 alleles are reported. No phenotypic data is available. It h…	3	1	1	5primeCassette		499		136	altexon
FBgn0027575	GABA-B-R2	3R	17601562	The gene metabotropic GABA-B receptor subtype 2 is referred to in FlyBase by the symbol Dmel\GABA-B-R2 (CG6706, FBgn0027575). It is a protein_coding_gene from Drosophila melanogaster. Its sequence location is 3R:17596055..17601562. It has the cytological map location 93F9. Based on sequence similarity, it is predicted to have molecular function</span>: GABA-B receptor activity. There is experimen…	2	1	1						altexon
FBgn0027657	glob1	3R	11728226	The gene globin 1 is referred to in FlyBase by the symbol Dmel\glob1 (CG9734, FBgn0027657). It is a protein_coding_gene from Drosophila melanogaster. Its sequence location is 3R:11722648..11728226. It has the cytological map location 89A8. Based on sequence similarity, it is predicted to have molecular function</span>: oxygen transporter activity. An electronic pipeline based on InterPro domains …	2	1	1	5primeCassette		62		345
FBgn0027786	Mtch	3L	184635	The gene Mitochondrial carrier homolog 1 is referred to in FlyBase by the symbol Dmel\Mtch (CG6851, FBgn0027786). It is a protein_coding_gene from Drosophila melanogaster. Its sequence location is 3L:184635..186317. It has the cytological map location 61B2. It is reported to have molecular function</span>: transmembrane transporter activity. An electronic pipeline based on InterPro domains sugges…	2	1	1						altexon
FBgn0027790	GV1	3L	1810589	The gene GV1 is referred to in FlyBase by the symbol Dmel\GV1 (CG12023, FBgn0027790). It is a protein_coding_gene from Drosophila melanogaster. Its sequence location is 3L:1810589..1822903. It has the cytological map location 62B4-62B6. There is experimental evidence that it has the molecular function</span>: DNA binding. The biological processes in which it is involved are not known. 3 alleles a…	2	1	1		3primeCassette		510		altexon
FBgn0027866	CG9776	3R	159727	This gene is referred to in FlyBase by the symbol Dmel\CG9776 (CG9776, FBgn0027866). It is a protein_coding_gene from Drosophila melanogaster. Its sequence location is 3R:153527..159727. It has the cytological map location 82A3-82A4. Its molecular function is unknown. The biological processes in which it is involved are not known. 3 alleles are reported. No phenotypic data is available. It has 2 …	2	1	1	5primeCassette	3primeCassette	784	213	45	altexon
FBgn0027950	MBD-like	3R	5385487	The gene MBD-like is referred to in FlyBase by the symbol Dmel\MBD-like (CG8208, FBgn0027950). It is a protein_coding_gene from Drosophila melanogaster. Its sequence location is 3R:5385487..5387255. It has the cytological map location 85D24. There is experimental evidence that it has the molecular function</span>: transcription regulator activity; transcription corepressor activity; methyl-CpG bi…	2	1	1					339
FBgn0027951	MTA1-like	3R	1474459	The gene MTA1-like is referred to in FlyBase by the symbol Dmel\MTA1-like (CG2244, FBgn0027951). It is a protein_coding_gene from Drosophila melanogaster. Its sequence location is 3R:1464809..1474459. It has the cytological map location 83B7. An electronic pipeline based on InterPro domains suggests that it has the molecular function</span>: transcription factor activity; sequence-specific DNA bi…	2	1	1					108
FBgn0028336	l(1)G0255	X	6572499	The gene lethal (1) G0255 is referred to in FlyBase by the symbol Dmel\l(1)G0255 (CG4094, FBgn0028336). It is a protein_coding_gene from Drosophila melanogaster. Its sequence location is X:6572499..6575887. It has the cytological map location 6C5. Based on sequence similarity, it is predicted to have molecular function</span>: fumarate hydratase activity. Based on sequence similarity, it is predi…	2	1	1	5primeCassette		151			altexon
FBgn0028386	cic	3R	16118987	The gene capicua is referred to in FlyBase by the symbol Dmel\cic (CG5067, FBgn0028386). It is a protein_coding_gene from Drosophila melanogaster. Its sequence location is 3R:16118987..16127099. It has the cytological map location 92E2. Based on sequence similarity, it is predicted to have molecular function</span>: transcription factor activity. There is experimental evidence that it is involved…	2	1	1	1	2				altexon
FBgn0028421	Kap3	X	11234117	The gene Kinesin associated protein 3 is referred to in FlyBase by the symbol Dmel\Kap3 (CG11759, FBgn0028421). It is a protein_coding_gene from Drosophila melanogaster. Its sequence location is X:11228220..11234117. It has the cytological map location 10B3. There is experimental evidence that it has the molecular function</span>: protein binding. There is experimental evidence that it is involve…	2	1	1	5primeCassette		342			altexon
FBgn0028497	CG3530	2R	19284202	This gene is referred to in FlyBase by the symbol Dmel\CG3530 (CG3530, FBgn0028497). It is a protein_coding_gene from Drosophila melanogaster. Its sequence location is 2R:19276524..19284202. It has the cytological map location 59D10. Based on sequence similarity, it is predicted to have molecular function</span>: protein tyrosine/serine/threonine phosphatase activity. There is experimental eviden…	2	1	1	5primeCassette		251		487
FBgn0028509	cenG1A	2L	13835567	The gene centaurin gamma 1A is referred to in FlyBase by the symbol Dmel\cenG1A (CG31811, FBgn0028509). It is a protein_coding_gene from Drosophila melanogaster. Its sequence location is 2L:13835567..13898715. It has the cytological map location 34D6-34E2. Based on sequence similarity, it is predicted to have molecular function</span>: ARF GTPase activator activity. It is reported to be involved …	3	1	1	5primeCassette		742			altexon
FBgn0028527	CG18507	2L	13665528	This gene is referred to in FlyBase by the symbol Dmel\CG18507 (CG18507, FBgn0028527). It is a protein_coding_gene from Drosophila melanogaster. Its sequence location is 2L:13665528..13670854. It has the cytological map location 34C6. Its molecular function is unknown. The biological processes in which it is involved are not known. 2 alleles are reported. No phenotypic data is available. It has 2…	2	1	1		3primeCassette		417		altexon
FBgn0028646	aralar1	3R	26281589	The gene aralar1 is referred to in FlyBase by the symbol Dmel\aralar1 (CG2139, FBgn0028646). It is a protein_coding_gene from Drosophila melanogaster. Its sequence location is 3R:26271361..26281589. It has the cytological map location 99F4-99F5. Based on sequence similarity, it is predicted to have molecular function</span>: calcium ion binding; transmembrane transporter activity. Based on sequen…	3	1	1	5primeCassette		217			altexon
FBgn0028717	Lnk	3R	21714265	The gene Lnk is referred to in FlyBase by the symbol Dmel\Lnk (CG17367, FBgn0028717). It is a protein_coding_gene from Drosophila melanogaster. Its sequence location is 3R:21714265..21718999. It has the cytological map location 96F6. It is reported to have molecular function</span>: signal transducer activity. There is experimental evidence that it is involved in the biological process</span>: po…	2	1	1	69					altexon
FBgn0028734	Fmr1	3R	5935844	The gene Fmr1 is referred to in FlyBase by the symbol Dmel\Fmr1 (CG6203, FBgn0028734). It is a protein_coding_gene from Drosophila melanogaster. Its sequence location is 3R:5927142..5935844. It has the cytological map location 85F10-85F12. There is experimental evidence that it has the molecular function</span>: protein binding; protein self-association; mRNA binding; RNA binding. There is experi…	2	1	1	5primeCassette	156	306			altexon
FBgn0028886	CG15279	2L	14851749	This gene is referred to in FlyBase by the symbol Dmel\CG15279 (CG15279, FBgn0028886). It is a protein_coding_gene from Drosophila melanogaster. Its sequence location is 2L:14844993..14851749. It has the cytological map location 35B6. Based on sequence similarity, it is predicted to have molecular function</span>: cation:amino acid symporter activity; neurotransmitter:sodium symporter activity; n…	3	1	1	5primeCassette		468		268	altexon
FBgn0028968	gammaCop	3R	27397865	The gene Î³-coatomer protein is referred to in FlyBase by the symbol Dmel\Î³Cop (CG1528, FBgn0028968). It is a protein_coding_gene from Drosophila melanogaster. Its sequence location is 3R:27397865..27401429. It has the cytological map location 100C6. An electronic pipeline based on InterPro domains suggests that it has the molecular function</span>: protein binding; structural molecule activity.…	2	1	1						altexon
FBgn0028985	Spn4	2R	2766428	The gene Serine protease inhibitor 4 is referred to in FlyBase by the symbol Dmel\Spn4 (CG9453, FBgn0028985). It is a protein_coding_gene from Drosophila melanogaster. Its sequence location is 2R:2763409..2766428. It has the cytological map location 42D6. There is experimental evidence that it has the molecular function</span>: serine-type endopeptidase inhibitor activity. There is experimental e…	4	1	1	5primeCassette	3primeCassette	79	215	207	altexon
FBgn0029092	ced-6	2R	5329065	The gene ced-6 is referred to in FlyBase by the symbol Dmel\ced-6 (CG11804, FBgn0029092). It is a protein_coding_gene from Drosophila melanogaster. Its sequence location is 2R:5322174..5329065. It has the cytological map location 45D7-45D8. There is experimental evidence that it has the molecular function</span>: protein binding. There is experimental evidence that it is involved in the biologica…	2	1	1	5primeCassette		369			altexon
FBgn0029522	CG13373	X	371180	This gene is referred to in FlyBase by the symbol Dmel\CG13373 (CG13373, FBgn0029522). It is a protein_coding_gene from Drosophila melanogaster. Its sequence location is X:371180..372224. It has the cytological map location 1B4. Its molecular function is unknown. The biological processes in which it is involved are not known. 2 alleles are reported. No phenotypic data is available. It has 2 annot…	2	1	1	5primeCassette		145			altexon
FBgn0029738	CG4068	X	4832077	This gene is referred to in FlyBase by the symbol Dmel\CG4068 (CG4068, FBgn0029738). It is a protein_coding_gene from Drosophila melanogaster. Its sequence location is X:4820694..4832077. It has the cytological map location 4D6-4D7. Its molecular function is unknown. The biological processes in which it is involved are not known. 23 alleles are reported. No phenotypic data is available. It has 5 …	4	1	1	5primeCassette		138			altexon
FBgn0029822	CG12236	X	5802158	This gene is referred to in FlyBase by the symbol Dmel\CG12236 (CG12236, FBgn0029822). It is a protein_coding_gene from Drosophila melanogaster. Its sequence location is X:5802158..5807112. It has the cytological map location 5C7. An electronic pipeline based on InterPro domains suggests that it has the molecular function</span>: protein binding; zinc ion binding. The biological processes in whic…	2	1	1		3primeCassette		654	1376
FBgn0029837	Tsp5D	X	5968890	The gene Tetraspanin 5D is referred to in FlyBase by the symbol Dmel\Tsp5D (CG4690, FBgn0029837). It is a protein_coding_gene from Drosophila melanogaster. Its sequence location is X:5963159..5968890. It has the cytological map location 5D3. Its molecular function is unknown. The biological processes in which it is involved are not known. 3 alleles are reported. No phenotypic data is available. I…	2	1	1	5primeCassette		281		136
FBgn0029846	Ca-alpha1T	X	6040199	The gene Ca-Î±1T is referred to in FlyBase by the symbol Dmel\Ca-Î±1T (CG15899, FBgn0029846). It is a protein_coding_gene from Drosophila melanogaster. Its sequence location is X:6001086..6040199. It has the cytological map location 5D5-5D6. Based on sequence similarity, it is predicted to have molecular function</span>: low voltage-gated calcium channel activity. An electronic pipeline based on …	2	1	1					166
FBgn0029854	CG3566	X	6170711	This gene is referred to in FlyBase by the symbol Dmel\CG3566 (CG3566, FBgn0029854). It is a protein_coding_gene from Drosophila melanogaster. Its sequence location is X:6169003..6170711. It has the cytological map location 5E4. Based on sequence similarity, it is predicted to have molecular function</span>: electron carrier activity. The biological processes in which it is involved are not known…	2	1	1						altexon
FBgn0029888	CG3192	X	6573151	This gene is referred to in FlyBase by the symbol Dmel\CG3192 (CG3192, FBgn0029888). It is a protein_coding_gene from Drosophila melanogaster. Its sequence location is X:6571294..6573151. It has the cytological map location 6C5. Based on sequence similarity, it is predicted to have molecular function</span>: NADH dehydrogenase activity; NADH dehydrogenase (ubiquinone) activity. Based on sequence …	2	1	1	5primeCassette		579			altexon
FBgn0029897	RpL17	X	6638290	The gene Ribosomal protein L17 is referred to in FlyBase by the symbol Dmel\RpL17 (CG3203, FBgn0029897). It is a protein_coding_gene from Drosophila melanogaster. Its sequence location is X:6635570..6638290. It has the cytological map location 6C10. Based on sequence similarity, it is predicted to have molecular function</span>: structural constituent of ribosome. There is experimental evidence t…	2	1	1	5primeCassette		62			altexon
FBgn0029898	CG14439	X	6641582	This gene is referred to in FlyBase by the symbol Dmel\CG14439 (CG14439, FBgn0029898). It is a protein_coding_gene from Drosophila melanogaster. Its sequence location is X:6641582..6649785. It has the cytological map location 6C11-6C12. Its molecular function is unknown. An electronic pipeline based on InterPro domains suggests that it is involved in the biological process</span>: transmembrane t…	2	1	1						altexon
FBgn0029899	CG14438	X	6650355	This gene is referred to in FlyBase by the symbol Dmel\CG14438 (CG14438, FBgn0029899). It is a protein_coding_gene from Drosophila melanogaster. Its sequence location is X:6650355..6664330. It has the cytological map location 6C12-6C13. An electronic pipeline based on InterPro domains suggests that it has the molecular function</span>: zinc ion binding. The biological processes in which it is inv…	2	1	1	5primeCassette		379			altexon
FBgn0029903	pod1	X	6697720	The gene pod1 is referred to in FlyBase by the symbol Dmel\pod1 (CG4532, FBgn0029903). It is a protein_coding_gene from Drosophila melanogaster. Its sequence location is X:6697720..6707554. It has the cytological map location 6D2-6D3. Based on sequence similarity, it is predicted to have molecular function</span>: actin binding. The biological processes in which it is involved are not known. 12 a…	2	1	1					543
FBgn0029911	CG14435	X	6737953	This gene is referred to in FlyBase by the symbol Dmel\CG14435 (CG14435, FBgn0029911). It is a protein_coding_gene from Drosophila melanogaster. Its sequence location is X:6733455..6737953. It has the cytological map location 6D4-6D5. An electronic pipeline based on InterPro domains suggests that it has the molecular function</span>: protein binding; zinc ion binding. The biological processes in …	2	1	1						altexon
FBgn0030038	CG1440	X	8331113	This gene is referred to in FlyBase by the symbol Dmel\CG1440 (CG1440, FBgn0030038). It is a protein_coding_gene from Drosophila melanogaster. Its sequence location is X:8331113..8334969. It has the cytological map location 7E9. Based on sequence similarity, it is predicted to have molecular function</span>: cysteine-type endopeptidase activity. An electronic pipeline based on InterPro domains su…	2	1	1	5primeCassette		215			altexon
FBgn0030073	CG10962	X	8943020	This gene is referred to in FlyBase by the symbol Dmel\CG10962 (CG10962, FBgn0030073). It is a protein_coding_gene from Drosophila melanogaster. Its sequence location is X:8866940..8943020. It has the cytological map location 8C1-8C4. Based on sequence similarity, it is predicted to have molecular function</span>: oxidoreductase activity, acting on the CH-OH group of donors, NAD or NADP as accept…	2	1	1	5primeCassette	6	198		589	altexon
FBgn0030101	CG12118	X	9090494	This gene is referred to in FlyBase by the symbol Dmel\CG12118 (CG12118, FBgn0030101). It is a protein_coding_gene from Drosophila melanogaster. Its sequence location is X:9088775..9090494. It has the cytological map location 8D1. Its molecular function is unknown. The biological processes in which it is involved are not known. 3 alleles are reported. No phenotypic data is available. It has 2 ann…	2	1	1						altexon
FBgn0030114	CG17754	X	9144460	This gene is referred to in FlyBase by the symbol Dmel\CG17754 (CG17754, FBgn0030114). It is a protein_coding_gene from Drosophila melanogaster. Its sequence location is X:9144460..9149853. It has the cytological map location 8D3. An electronic pipeline based on InterPro domains suggests that it has the molecular function</span>: protein binding. There is experimental evidence that it is involved…	3	1	1	17	3primeCassette		193		altexon
FBgn0030171	Cht6	X	9924145	The gene Cht6 is referred to in FlyBase by the symbol Dmel\Cht6 (CG2989, FBgn0030171). It is a protein_coding_gene from Drosophila melanogaster. Its sequence location is X:9924145..9938633. It has the cytological map location 9A4. Based on sequence similarity, it is predicted to have molecular function</span>: chitinase activity. An electronic pipeline based on InterPro domains suggests that it i…	2	1	1					452	altexon
FBgn0030230	Rph	X	10651699	The gene Rabphilin is referred to in FlyBase by the symbol Dmel\Rph (CG11556, FBgn0030230). It is a protein_coding_gene from Drosophila melanogaster. Its sequence location is X:10643110..10651699. It has the cytological map location 9E2-9E4. Based on sequence similarity, it is predicted to have molecular function</span>: protein transporter activity. Based on sequence similarity, it is predicted …	2	1	1					168
FBgn0030245	CG1637	X	10771840	This gene is referred to in FlyBase by the symbol Dmel\CG1637 (CG1637, FBgn0030245). It is a protein_coding_gene from Drosophila melanogaster. Its sequence location is X:10764627..10771840. It has the cytological map location 9F5-9F7. Based on sequence similarity, it is predicted to have molecular function</span>: acid phosphatase activity. The biological processes in which it is involved are not…	3	1	1		3primeCassette		715	194	altexon
FBgn0030258	CG1552	X	10947549	This gene is referred to in FlyBase by the symbol Dmel\CG1552 (CG1552, FBgn0030258). It is a protein_coding_gene from Drosophila melanogaster. Its sequence location is X:10946369..10947549. It has the cytological map location 10A3. Its molecular function is unknown. The biological processes in which it is involved are not known. 2 alleles are reported. No phenotypic data is available. It has 2 an…	2	1	1						altexon
FBgn0030299	CG11727	X	11348335	This gene is referred to in FlyBase by the symbol Dmel\CG11727 (CG11727, FBgn0030299). It is a protein_coding_gene from Drosophila melanogaster. Its sequence location is X:11326945..11348335. It has the cytological map location 10B11-10B14. An electronic pipeline based on InterPro domains suggests that it has the molecular function</span>: Rab GTPase activator activity. An electronic pipeline bas…	3	1	1		3primeCassette		506		altexon
FBgn0030349	CG10353	X	11781192	This gene is referred to in FlyBase by the symbol Dmel\CG10353 (CG10353, FBgn0030349). It is a protein_coding_gene from Drosophila melanogaster. Its sequence location is X:11771772..11781192. It has the cytological map location 10F2-10F4. Its molecular function is unknown. The biological processes in which it is involved are not known. 4 alleles are reported. No phenotypic data is available. It h…	2	1	1					484	altexon
FBgn0030391	Rab40	X	12357141	The gene Rab40 is referred to in FlyBase by the symbol Dmel\Rab40 (CG1900, FBgn0030391). It is a protein_coding_gene from Drosophila melanogaster. Its sequence location is X:12353823..12357141. It has the cytological map location 11A11. Based on sequence similarity, it is predicted to have molecular function</span>: GTPase activity. There is experimental evidence that it is involved in the biolog…	2	1	1						altexon
FBgn0030418	CG4004	X	12638499	This gene is referred to in FlyBase by the symbol Dmel\CG4004 (CG4004, FBgn0030418). It is a protein_coding_gene from Drosophila melanogaster. Its sequence location is X:12638499..12643818. It has the cytological map location 11B14. Its molecular function is unknown. The biological processes in which it is involved are not known. 10 alleles are reported. No phenotypic data is available. It has 2 …	2	1	1	5primeCassette	2024	484			altexon
FBgn0030421	CG3812	X	12659301	This gene is referred to in FlyBase by the symbol Dmel\CG3812 (CG3812, FBgn0030421). It is a protein_coding_gene from Drosophila melanogaster. Its sequence location is X:12659301..12665016. It has the cytological map location 11B16. Based on sequence similarity, it is predicted to have molecular function</span>: 1-acylglycerol-3-phosphate O-acyltransferase activity. An electronic pipeline based o…	2	1	1						altexon
FBgn0030431	CG4407	X	12797550	This gene is referred to in FlyBase by the symbol Dmel\CG4407 (CG4407, FBgn0030431). It is a protein_coding_gene from Drosophila melanogaster. Its sequence location is X:12795386..12797550. It has the cytological map location 11D1. Based on sequence similarity, it is predicted to have molecular function</span>: FMN adenylyltransferase activity. An electronic pipeline based on InterPro domains sug…	2	1	1	5primeCassette		189			altexon
FBgn0030469	CG15745	X	13198915	This gene is referred to in FlyBase by the symbol Dmel\CG15745 (CG15745, FBgn0030469). It is a protein_coding_gene from Drosophila melanogaster. Its sequence location is X:13198915..13201427. It has the cytological map location 11E9. Its molecular function is unknown. The biological processes in which it is involved are not known. 5 alleles are reported. No phenotypic data is available. It has 2 …	2	1	1	637					altexon
FBgn0030485	CG1998	X	13307107	This gene is referred to in FlyBase by the symbol Dmel\CG1998 (CG1998, FBgn0030485). It is a protein_coding_gene from Drosophila melanogaster. Its sequence location is X:13303402..13307107. It has the cytological map location 11F4. Based on sequence similarity, it is predicted to have molecular function</span>: C-4 methylsterol oxidase activity. An electronic pipeline based on InterPro domains su…	2	1	1	5primeCassette		93			altexon
FBgn0030574	CG9413	X	14496613	This gene is referred to in FlyBase by the symbol Dmel\CG9413 (CG9413, FBgn0030574). It is a protein_coding_gene from Drosophila melanogaster. Its sequence location is X:14478766..14496613. It has the cytological map location 12F1. Based on sequence similarity, it is predicted to have molecular function</span>: amino acid transmembrane transporter activity. Based on sequence similarity, it is pre…	2	1	1	5primeCassette		119		269
FBgn0030603	CG5541	X	14938141	This gene is referred to in FlyBase by the symbol Dmel\CG5541 (CG5541, FBgn0030603). It is a protein_coding_gene from Drosophila melanogaster. Its sequence location is X:14938141..14945533. It has the cytological map location 13A5. An electronic pipeline based on InterPro domains suggests that it has the molecular function</span>: binding. The biological processes in which it is involved are not …	2	1	1	5primeCassette		176			altexon
FBgn0030634	CG9164	X	15279439	This gene is referred to in FlyBase by the symbol Dmel\CG9164 (CG9164, FBgn0030634). It is a protein_coding_gene from Drosophila melanogaster. Its sequence location is X:15274655..15279439. It has the cytological map location 13C1. An electronic pipeline based on InterPro domains suggests that it has the molecular function</span>: sulfotransferase activity. The biological processes in which it is…	3	1	1	5primeCassette		496		104
FBgn0030641	CG6299	X	15356745	This gene is referred to in FlyBase by the symbol Dmel\CG6299 (CG6299, FBgn0030641). It is a protein_coding_gene from Drosophila melanogaster. Its sequence location is X:15356745..15360845. It has the cytological map location 13C4. An electronic pipeline based on InterPro domains suggests that it has the molecular function</span>: glycolipid transporter activity; glycolipid binding. Based on sequ…	2	1	1	5primeCassette		1714			altexon
FBgn0030648	CG6340	X	15376400	This gene is referred to in FlyBase by the symbol Dmel\CG6340 (CG6340, FBgn0030648). It is a protein_coding_gene from Drosophila melanogaster. Its sequence location is X:15376400..15380642. It has the cytological map location 13C5. Its molecular function is unknown. The biological processes in which it is involved are not known. 9 alleles are reported. No phenotypic data is available. It has 3 an…	2	1	1		3primeCassette		1278		altexon
FBgn0030672	CG9281	X	15604631	This gene is referred to in FlyBase by the symbol Dmel\CG9281 (CG9281, FBgn0030672). It is a protein_coding_gene from Drosophila melanogaster. Its sequence location is X:15599839..15604631. It has the cytological map location 13E8. Based on sequence similarity, it is predicted to have molecular function</span>: ATPase activity, coupled to transmembrane movement of substances; transporter activity…	2	1	1	5primeCassette		293			altexon
FBgn0030680	CG8944	X	15640240	This gene is referred to in FlyBase by the symbol Dmel\CG8944 (CG8944, FBgn0030680). It is a protein_coding_gene from Drosophila melanogaster. Its sequence location is X:15635368..15640240. It has the cytological map location 13E12-13E13. An electronic pipeline based on InterPro domains suggests that it has the molecular function</span>: zinc ion binding. The biological processes in which it is i…	2	1	1						altexon
FBgn0030685	Graf	X	15654741	The gene Graf is referred to in FlyBase by the symbol Dmel\Graf (CG8948, FBgn0030685). It is a protein_coding_gene from Drosophila melanogaster. Its sequence location is X:15645707..15654741. It has the cytological map location 13E14. Based on sequence similarity, it is predicted to have molecular function</span>: Rho GTPase activator activity. An electronic pipeline based on InterPro domains sug…	2	1	1					70	altexon
FBgn0030701	CG16952	X	15764209	This gene is referred to in FlyBase by the symbol Dmel\CG16952 (CG16952, FBgn0030701). It is a protein_coding_gene from Drosophila melanogaster. Its sequence location is X:15764209..15769563. It has the cytological map location 13F17. An electronic pipeline based on InterPro domains suggests that it has the molecular function</span>: protein binding. The biological processes in which it is involv…	2	1	1						altexon
FBgn0030716	CG9170	X	15876974	This gene is referred to in FlyBase by the symbol Dmel\CG9170 (CG9170, FBgn0030716). It is a protein_coding_gene from Drosophila melanogaster. Its sequence location is X:15872136..15876974. It has the cytological map location 14A4-14A5. An electronic pipeline based on InterPro domains suggests that it has the molecular function</span>: protein binding. The biological processes in which it is invo…	2	1	1						altexon
FBgn0030719	eIF5	X	15886023	The gene eIF5 is referred to in FlyBase by the symbol Dmel\eIF5 (CG9177, FBgn0030719). It is a protein_coding_gene from Drosophila melanogaster. Its sequence location is X:15881194..15886023. It has the cytological map location 14A5. Based on sequence similarity, it is predicted to have molecular function</span>: translation initiation factor activity. Based on sequence similarity, it is predicte…	2	1	1	5primeCassette		169		263	altexon
FBgn0030745	CG4239	X	16279348	This gene is referred to in FlyBase by the symbol Dmel\CG4239 (CG4239, FBgn0030745). It is a protein_coding_gene from Drosophila melanogaster. Its sequence location is X:16279348..16282736. It has the cytological map location 14C2. An electronic pipeline based on InterPro domains suggests that it has the molecular function</span>: cation channel activity. An electronic pipeline based on InterPro …	2	1	1	311					altexon
FBgn0030749	Anxb11	X	16316249	The gene Annexin B11 is referred to in FlyBase by the symbol Dmel\Anxb11 (CG9968, FBgn0030749). It is a protein_coding_gene from Drosophila melanogaster. Its sequence location is X:16311269..16316249. It has the cytological map location 14C4. Based on sequence similarity, it is predicted to have molecular function</span>: actin binding. There is experimental evidence that it is involved in the bi…	2	1	1	5primeCassette		50		567	altexon
FBgn0030778	CG4678	X	16590165	This gene is referred to in FlyBase by the symbol Dmel\CG4678 (CG4678, FBgn0030778). It is a protein_coding_gene from Drosophila melanogaster. Its sequence location is X:16590165..16605178. It has the cytological map location 15A1-15A3. Based on sequence similarity, it is predicted to have molecular function</span>: serine-type carboxypeptidase activity. An electronic pipeline based on InterPro d…	4	1	1					42	altexon
FBgn0030796	CG4829	X	16705733	This gene is referred to in FlyBase by the symbol Dmel\CG4829 (CG4829, FBgn0030796). It is a protein_coding_gene from Drosophila melanogaster. Its sequence location is X:16705733..16720529. It has the cytological map location 15A10-15A11. Based on sequence similarity, it is predicted to have molecular function</span>: protein-glutamine gamma-glutamyltransferase activity. The biological processes …	2	1	1	5primeCassette		362			altexon
FBgn0030850	CG8408	X	17521929	This gene is referred to in FlyBase by the symbol Dmel\CG8408 (CG8408, FBgn0030850). It is a protein_coding_gene from Drosophila melanogaster. Its sequence location is X:17517247..17521929. It has the cytological map location 16B9. Its molecular function is unknown. The biological processes in which it is involved are not known. 2 alleles are reported. No phenotypic data is available. It has 2 an…	2	1	1		3primeCassette		992		altexon
FBgn0030873	CG15814	X	17744396	This gene is referred to in FlyBase by the symbol Dmel\CG15814 (CG15814, FBgn0030873). It is a protein_coding_gene from Drosophila melanogaster. Its sequence location is X:17742143..17744396. It has the cytological map location 16E1. An electronic pipeline based on InterPro domains suggests that it has the molecular function</span>: protein binding; zinc ion binding. The biological processes in w…	2	1	1	5primeCassette		438			altexon
FBgn0030892	CG7206	X	17984542	This gene is referred to in FlyBase by the symbol Dmel\CG7206 (CG7206, FBgn0030892). It is a protein_coding_gene from Drosophila melanogaster. Its sequence location is X:17982757..17984542. It has the cytological map location 16F6. Its molecular function is unknown. The biological processes in which it is involved are not known. 2 alleles are reported. No phenotypic data is available. It has 2 an…	2	1	1	31	3				altexon
FBgn0030894	CG7192	X	17995367	This gene is referred to in FlyBase by the symbol Dmel\CG7192 (CG7192, FBgn0030894). It is a protein_coding_gene from Drosophila melanogaster. Its sequence location is X:17991867..17995367. It has the cytological map location 16F6. Its molecular function is unknown. The biological processes in which it is involved are not known. 6 alleles are reported. No phenotypic data is available. It has 2 an…	2	1	1	5primeCassette		242			altexon
FBgn0030976	CG7378	X	18794443	This gene is referred to in FlyBase by the symbol Dmel\CG7378 (CG7378, FBgn0030976). It is a protein_coding_gene from Drosophila melanogaster. Its sequence location is X:18794443..18803330. It has the cytological map location 17F2. It is reported to have molecular function</span>: protein tyrosine/serine/threonine phosphatase activity. It is reported to be involved in the biological process</span…	2	1	1					60
FBgn0031066	CG14235	X	19638371	This gene is referred to in FlyBase by the symbol Dmel\CG14235 (CG14235, FBgn0031066). It is a protein_coding_gene from Drosophila melanogaster. Its sequence location is X:19634575..19638371. It has the cytological map location 18E5. Based on sequence similarity, it is predicted to have molecular function</span>: cytochrome-c oxidase activity. The biological processes in which it is involved are …	3	1	1		33				altexon
FBgn0031119	CG1812	X	20382574	This gene is referred to in FlyBase by the symbol Dmel\CG1812 (CG1812, FBgn0031119). It is a protein_coding_gene from Drosophila melanogaster. Its sequence location is X:20382574..20386859. It has the cytological map location 19D2. Based on sequence similarity, it is predicted to have molecular function</span>: actin binding. The biological processes in which it is involved are not known. 4 allel…	2	1	1	5primeCassette	4	541			altexon
FBgn0031195	CG17600	X	21917035	This gene is referred to in FlyBase by the symbol Dmel\CG17600 (CG17600, FBgn0031195). It is a protein_coding_gene from Drosophila melanogaster. Its sequence location is X:21917035..21943860. It has the cytological map location 20C1. Its molecular function is unknown. The biological processes in which it is involved are not known. 12 alleles are reported. No phenotypic data is available. It has 2…	2	1	1	5primeCassette		395			altexon
FBgn0031220	CG4822	2L	121974	This gene is referred to in FlyBase by the symbol Dmel\CG4822 (CG4822, FBgn0031220). It is a protein_coding_gene from Drosophila melanogaster. Its sequence location is 2L:117079..121974. It has the cytological map location 21B2. Based on sequence similarity, it is predicted to have molecular function</span>: ATPase activity, coupled to transmembrane movement of substances; transporter activity. T…	2	1	1						altexon
FBgn0031285	CG3662	2L	821418	This gene is referred to in FlyBase by the symbol Dmel\CG3662 (CG3662, FBgn0031285). It is a protein_coding_gene from Drosophila melanogaster. Its sequence location is 2L:821418..824337. It has the cytological map location 21E2. Its molecular function is unknown. The biological processes in which it is involved are not known. 2 alleles are reported. No phenotypic data is available. It has 3 annot…	2	1	1						altexon
FBgn0031319	CG4896	2L	1177706	This gene is referred to in FlyBase by the symbol Dmel\CG4896 (CG4896, FBgn0031319). It is a protein_coding_gene from Drosophila melanogaster. Its sequence location is 2L:1177706..1182459. It has the cytological map location 21F2. Based on sequence similarity, it is predicted to have molecular function</span>: mRNA binding. The biological processes in which it is involved are not known. 7 alleles…	2	1	1	14	5				altexon
FBgn0031362	CG17646	2L	1732526	This gene is referred to in FlyBase by the symbol Dmel\CG17646 (CG17646, FBgn0031362). It is a protein_coding_gene from Drosophila melanogaster. Its sequence location is 2L:1732526..1750613. It has the cytological map location 22B1-22B2. Based on sequence similarity, it is predicted to have molecular function</span>: ATPase activity, coupled to transmembrane movement of substances; transporter ac…	2	1	1	5primeCassette		129			altexon
FBgn0031384	CG4238	2L	2010118	This gene is referred to in FlyBase by the symbol Dmel\CG4238 (CG4238, FBgn0031384). It is a protein_coding_gene from Drosophila melanogaster. Its sequence location is 2L:2010118..2030536. It has the cytological map location 22B8-22C1. Based on sequence similarity, it is predicted to have molecular function</span>: ubiquitin-protein ligase activity. An electronic pipeline based on InterPro domain…	2	1	1	5primeCassette		196			altexon
FBgn0031395	CG10874	2L	2192372	This gene is referred to in FlyBase by the symbol Dmel\CG10874 (CG10874, FBgn0031395). It is a protein_coding_gene from Drosophila melanogaster. Its sequence location is 2L:2189913..2192372. It has the cytological map location 22D1. Its molecular function is unknown. The biological processes in which it is involved are not known. 2 alleles are reported. No phenotypic data is available. It has 2 a…	2	1	1		3				altexon
FBgn0031436	CG3214	2L	2580056	This gene is referred to in FlyBase by the symbol Dmel\CG3214 (CG3214, FBgn0031436). It is a protein_coding_gene from Drosophila melanogaster. Its sequence location is 2L:2579217..2580056. It has the cytological map location 23A1. Based on sequence similarity, it is predicted to have molecular function</span>: NADH dehydrogenase activity; NADH dehydrogenase (ubiquinone) activity. Based on sequenc…	2	1	1	18					altexon
FBgn0031450	Hrs	2L	2739986	The gene Hepatocyte growth factor regulated tyrosine kinase substrate is referred to in FlyBase by the symbol Dmel\Hrs (CG2903, FBgn0031450). It is a protein_coding_gene from Drosophila melanogaster. Its sequence location is 2L:2739986..2743377. It has the cytological map location 23A3. It is reported to have molecular function</span>: protein binding. There is experimental evidence that it is in…	2	1	1	5primeCassette	1	170			altexon
FBgn0031589	CG3714	2L	4198058	This gene is referred to in FlyBase by the symbol Dmel\CG3714 (CG3714, FBgn0031589). It is a protein_coding_gene from Drosophila melanogaster. Its sequence location is 2L:4189497..4198058. It has the cytological map location 24D8. Based on sequence similarity, it is predicted to have molecular function</span>: nicotinate phosphoribosyltransferase activity. An electronic pipeline based on InterPro…	3	1	1						altexon
FBgn0031628	CG3294	2L	4794549	This gene is referred to in FlyBase by the symbol Dmel\CG3294 (CG3294, FBgn0031628). It is a protein_coding_gene from Drosophila melanogaster. Its sequence location is 2L:4794549..4796576. It has the cytological map location 25A6. Based on sequence similarity, it is predicted to have molecular function</span>: mRNA binding. Based on sequence similarity, it is predicted to be involved in the biolo…	2	1	1						altexon
FBgn0031635	CG15626	2L	4837996	This gene is referred to in FlyBase by the symbol Dmel\CG15626 (CG15626, FBgn0031635). It is a protein_coding_gene from Drosophila melanogaster. Its sequence location is 2L:4835333..4837996. It has the cytological map location 25A8. Its molecular function is unknown. The biological processes in which it is involved are not known. 4 alleles are reported. No phenotypic data is available. It has 2 a…	2	1	1	5primeCassette		152			altexon
FBgn0031636	CG12194	2L	4839219	This gene is referred to in FlyBase by the symbol Dmel\CG12194 (CG12194, FBgn0031636). It is a protein_coding_gene from Drosophila melanogaster. Its sequence location is 2L:4839219..4841465. It has the cytological map location 25A8. Its molecular function is unknown. An electronic pipeline based on InterPro domains suggests that it is involved in the biological process</span>: transmembrane trans…	2	1	1						altexon
FBgn0031681	pgant5	2L	5093590	The gene polypeptide GalNAc transferase 5 is referred to in FlyBase by the symbol Dmel\pgant5 (CG31651, FBgn0031681). It is a protein_coding_gene from Drosophila melanogaster. Its sequence location is 2L:5072156..5093590. It has the cytological map location 25C4-25C6. There is experimental evidence that it has the molecular function</span>: polypeptide N-acetylgalactosaminyltransferase activity. …	2	1	1					181
FBgn0031717	Oscillin	2L	5547203	The gene Oscillin is referred to in FlyBase by the symbol Dmel\Oscillin (CG6957, FBgn0031717). It is a protein_coding_gene from Drosophila melanogaster. Its sequence location is 2L:5547203..5549614. It has the cytological map location 25E6. Based on sequence similarity, it is predicted to have molecular function</span>: glucosamine-6-phosphate deaminase activity. An electronic pipeline based on I…	2	1	1	57					altexon
FBgn0031737	obst-E	2L	5766141	The gene obstructor-E is referred to in FlyBase by the symbol Dmel\obst-E (CG11142, FBgn0031737). It is a protein_coding_gene from Drosophila melanogaster. Its sequence location is 2L:5762553..5766141. It has the cytological map location 25F4. Based on sequence similarity, it is predicted to have molecular function</span>: chitin binding; structural constituent of peritrophic membrane. An electro…	2	1	1		3primeCassette		816		altexon
FBgn0031762	CG9098	2L	6012338	This gene is referred to in FlyBase by the symbol Dmel\CG9098 (CG9098, FBgn0031762). It is a protein_coding_gene from Drosophila melanogaster. Its sequence location is 2L:6007364..6012338. It has the cytological map location 26B2. Based on sequence similarity, it is predicted to have molecular function</span>: SH3/SH2 adaptor activity. An electronic pipeline based on InterPro domains suggests tha…	2	1	1	5primeCassette	141	160		239	altexon
FBgn0031818	CG9536	2L	6476972	This gene is referred to in FlyBase by the symbol Dmel\CG9536 (CG9536, FBgn0031818). It is a protein_coding_gene from Drosophila melanogaster. Its sequence location is 2L:6474438..6476972. It has the cytological map location 26D7. Its molecular function is unknown. The biological processes in which it is involved are not known. 4 alleles are reported. No phenotypic data is available. It has 2 ann…	2	1	1						altexon
FBgn0031850	Tsp	2L	6709085	The gene Thrombospondin is referred to in FlyBase by the symbol Dmel\Tsp (CG11326, FBgn0031850). It is a protein_coding_gene from Drosophila melanogaster. Its sequence location is 2L:6686786..6709085. It has the cytological map location 26F7-27A1. There is experimental evidence that it has the molecular function</span>: heparin binding. There is experimental evidence that it is involved in the bi…	3	1	1	5	3primeCassette		177		altexon
FBgn0031893	CG4495	2L	7182236	This gene is referred to in FlyBase by the symbol Dmel\CG4495 (CG4495, FBgn0031893). It is a protein_coding_gene from Drosophila melanogaster. Its sequence location is 2L:7182236..7185530. It has the cytological map location 27E4. An electronic pipeline based on InterPro domains suggests that it has the molecular function</span>: calcium ion binding. The biological processes in which it is involv…	2	1	1					163
FBgn0031897	CG13784	2L	7220029	This gene is referred to in FlyBase by the symbol Dmel\CG13784 (CG13784, FBgn0031897). It is a protein_coding_gene from Drosophila melanogaster. Its sequence location is 2L:7205250..7220029. It has the cytological map location 27E4-27E5. Its molecular function is unknown. The biological processes in which it is involved are not known. 5 alleles are reported. No phenotypic data is available. It ha…	2	1	1		3primeCassette		2850		altexon
FBgn0031968	CG7231	2L	7983920	This gene is referred to in FlyBase by the symbol Dmel\CG7231 (CG7231, FBgn0031968). It is a protein_coding_gene from Drosophila melanogaster. Its sequence location is 2L:7983920..7986786. It has the cytological map location 28D3. Its molecular function is unknown. The biological processes in which it is involved are not known. 7 alleles are reported. No phenotypic data is available. It has 3 ann…	2	1	1	5primeCassette		319			altexon
FBgn0031969	pes	2L	7994182	The gene peste is referred to in FlyBase by the symbol Dmel\pes (CG7228, FBgn0031969). It is a protein_coding_gene from Drosophila melanogaster. Its sequence location is 2L:7987113..7994182. It has the cytological map location 28D3. It is reported to have molecular function</span>: scavenger receptor activity. It is reported to be involved in the biological process</span>: defense response. 13 al…	2	1	1						altexon
FBgn0031975	Tg	2L	8011407	The gene Transglutaminase is referred to in FlyBase by the symbol Dmel\Tg (CG7356, FBgn0031975). It is a protein_coding_gene from Drosophila melanogaster. Its sequence location is 2L:8011407..8026901. It has the cytological map location 28D3. Based on sequence similarity, it is predicted to have molecular function</span>: protein-glutamine gamma-glutamyltransferase activity. There is experimental…	2	1	1	5primeCassette		477			altexon
FBgn0031993	CG8486	2L	8163298	This gene is referred to in FlyBase by the symbol Dmel\CG8486 (CG8486, FBgn0031993). It is a protein_coding_gene from Drosophila melanogaster. Its sequence location is 2L:8163298..8190044. It has the cytological map location 28E9-28F1. Its molecular function is unknown. The biological processes in which it is involved are not known. 10 alleles are reported. No phenotypic data is available. It has…	2	1	1					153
FBgn0032010	CG8086	2L	8257502	This gene is referred to in FlyBase by the symbol Dmel\CG8086 (CG8086, FBgn0032010). It is a protein_coding_gene from Drosophila melanogaster. Its sequence location is 2L:8244159..8257502. It has the cytological map location 28F5-29A1. Its molecular function is unknown. The biological processes in which it is involved are not known. 5 alleles are reported. No phenotypic data is available. It has …	2	1	1	5primeCassette	3primeCassette	425	343	99	altexon
FBgn0032022	CG14275	2L	8327458	This gene is referred to in FlyBase by the symbol Dmel\CG14275 (CG14275, FBgn0032022). It is a protein_coding_gene from Drosophila melanogaster. Its sequence location is 2L:8327458..8332911. It has the cytological map location 29A5. Its molecular function is unknown. The biological processes in which it is involved are not known. 4 alleles are reported. No phenotypic data is available. It has 2 a…	2	1	1	5primeCassette		126			altexon
FBgn0032029	CG17292	2L	8370513	This gene is referred to in FlyBase by the symbol Dmel\CG17292 (CG17292, FBgn0032029). It is a protein_coding_gene from Drosophila melanogaster. Its sequence location is 2L:8370513..8374257. It has the cytological map location 29B2. Based on sequence similarity, it is predicted to have molecular function</span>: triglyceride lipase activity. An electronic pipeline based on InterPro domains sugges…	2	1	1	5primeCassette		129			altexon
FBgn0032078	C1GalTA	2L	8951200	The gene Core 1 Galactosyltransferase A is referred to in FlyBase by the symbol Dmel\C1GalTA (CG9520, FBgn0032078). It is a protein_coding_gene from Drosophila melanogaster. Its sequence location is 2L:8943454..8951200. It has the cytological map location 29F5. There is experimental evidence that it has the molecular function</span>: beta-1,3-galactosyltransferase activity; glycoprotein-N-acetylg…	2	1	1						altexon
FBgn0032120	CG33298	2L	9495472	This gene is referred to in FlyBase by the symbol Dmel\CG33298 (CG33298, FBgn0032120). It is a protein_coding_gene from Drosophila melanogaster. Its sequence location is 2L:9495472..9520696. It has the cytological map location 30B5-30B10. Based on sequence similarity, it is predicted to have molecular function</span>: phospholipid-translocating ATPase activity. Based on sequence similarity, it is…	3	1	1						altexon
FBgn0032123	Oatp30B	2L	9521214	The gene Organic anion transporting polypeptide 30B is referred to in FlyBase by the symbol Dmel\Oatp30B (CG3811, FBgn0032123). It is a protein_coding_gene from Drosophila melanogaster. Its sequence location is 2L:9521214..9540060. It has the cytological map location 30B10. Based on sequence similarity, it is predicted to have molecular function</span>: organic anion transmembrane transporter act…	2	1	1						altexon
FBgn0032130	CG3838	2L	9568892	This gene is referred to in FlyBase by the symbol Dmel\CG3838 (CG3838, FBgn0032130). It is a protein_coding_gene from Drosophila melanogaster. Its sequence location is 2L:9568892..9573572. It has the cytological map location 30B12. An electronic pipeline based on InterPro domains suggests that it has the molecular function</span>: DNA binding. The biological processes in which it is involved are …	2	1	1	5primeCassette		307			altexon
FBgn0032151	nAcRalpha-30D	2L	9886214	The gene nicotinic Acetylcholine Receptor Î± 30D is referred to in FlyBase by the symbol Dmel\nAcRÎ±-30D (CG4128, FBgn0032151). It is a protein_coding_gene from Drosophila melanogaster. Its sequence location is 2L:9796948..9886214. It has the cytological map location 30D1-30E1. Based on sequence similarity, it is predicted to have molecular function</span>: nicotinic acetylcholine-activated catio…	3	1	1		3primeCassette		245	45	altexon
FBgn0032156	CG13124	2L	9908649	This gene is referred to in FlyBase by the symbol Dmel\CG13124 (CG13124, FBgn0032156). It is a protein_coding_gene from Drosophila melanogaster. Its sequence location is 2L:9903379..9908649. It has the cytological map location 30E1. An electronic pipeline based on InterPro domains suggests that it has the molecular function</span>: protein binding. An electronic pipeline based on InterPro domains…	3	1	1						altexon
FBgn0032195	CG4908	2L	10222658	This gene is referred to in FlyBase by the symbol Dmel\CG4908 (CG4908, FBgn0032195). It is a protein_coding_gene from Drosophila melanogaster. Its sequence location is 2L:10222658..10224442. It has the cytological map location 31B1. Based on sequence similarity, it is predicted to have molecular function</span>: ATPase activity. Based on sequence similarity, it is predicted to be involved in the …	2	1	1						altexon
FBgn0032196	CG5708	2L	10226808	This gene is referred to in FlyBase by the symbol Dmel\CG5708 (CG5708, FBgn0032196). It is a protein_coding_gene from Drosophila melanogaster. Its sequence location is 2L:10224664..10226808. It has the cytological map location 31B1. An electronic pipeline based on InterPro domains suggests that it has the molecular function</span>: zinc ion binding. The biological processes in which it is involve…	2	1	1					92
FBgn0032197	CG5694	2L	10231689	This gene is referred to in FlyBase by the symbol Dmel\CG5694 (CG5694, FBgn0032197). It is a protein_coding_gene from Drosophila melanogaster. Its sequence location is 2L:10227760..10231689. It has the cytological map location 31B1. Its molecular function is unknown. The biological processes in which it is involved are not known. 8 alleles are reported. No phenotypic data is available. It has 2 a…	2	1	1						altexon
FBgn0032202	CG18619	2L	10264131	This gene is referred to in FlyBase by the symbol Dmel\CG18619 (CG18619, FBgn0032202). It is a protein_coding_gene from Drosophila melanogaster. Its sequence location is 2L:10264131..10265229. It has the cytological map location 31B1. Based on sequence similarity, it is predicted to have molecular function</span>: protein dimerization activity. An electronic pipeline based on InterPro domains sug…	2	1	1						altexon
FBgn0032210	CYLD	2L	10299827	The gene cylindromatosis is referred to in FlyBase by the symbol Dmel\CYLD (CG5603, FBgn0032210). It is a protein_coding_gene from Drosophila melanogaster. Its sequence location is 2L:10295856..10299827. It has the cytological map location 31C7-31D1. There is experimental evidence that it has the molecular function</span>: ubiquitin-specific protease activity. There is experimental evidence that …	2	1	1	5primeCassette		66			altexon
FBgn0032336	Ast-C	2L	11081397	The gene Allatostatin C is referred to in FlyBase by the symbol Dmel\Ast-C (CG14919, FBgn0032336). It is a protein_coding_gene from Drosophila melanogaster. Its sequence location is 2L:11076165..11081397. It has the cytological map location 32D2. There is experimental evidence that it has the molecular function</span>: neuropeptide hormone activity. It is reported to be involved in the biological…	2	1	1	3					altexon
FBgn0032455	CG5792	2L	12721957	This gene is referred to in FlyBase by the symbol Dmel\CG5792 (CG5792, FBgn0032455). It is a protein_coding_gene from Drosophila melanogaster. Its sequence location is 2L:12713276..12721957. It has the cytological map location 33F3-33F4. Its molecular function is unknown. The biological processes in which it is involved are not known. 4 alleles are reported. No phenotypic data is available. It ha…	2	1	1		3primeCassette		100	2163	altexon
FBgn0032475	Sfmbt	2L	13176783	The gene Scm-related gene containing four mbt domains is referred to in FlyBase by the symbol Dmel\Sfmbt (CG16975, FBgn0032475). It is a protein_coding_gene from Drosophila melanogaster. Its sequence location is 2L:13169643..13176783. It has the cytological map location 34A7-34A8. There is experimental evidence that it has the molecular function</span>: protein binding; chromatin binding; methyla…	2	1	1					838	altexon
FBgn0032506	CG9395	2L	13355073	This gene is referred to in FlyBase by the symbol Dmel\CG9395 (CG9395, FBgn0032506). It is a protein_coding_gene from Drosophila melanogaster. Its sequence location is 2L:13349823..13355073. It has the cytological map location 34B6-34B7. Its molecular function is unknown. The biological processes in which it is involved are not known. 2 alleles are reported. No phenotypic data is available. It ha…	2	1	1	5primeCassette		132			altexon
FBgn0032515	loqs	2L	13382648	The gene loquacious is referred to in FlyBase by the symbol Dmel\loqs (CG6866, FBgn0032515). It is a protein_coding_gene from Drosophila melanogaster. Its sequence location is 2L:13382648..13385671. It has the cytological map location 34B9. There is experimental evidence that it has the molecular function</span>: protein binding. There is experimental evidence that it is involved in the biologica…	2	1	1					138
FBgn0032586	Tpr2	2L	16491542	The gene Tetratricopeptide repeat protein 2 is referred to in FlyBase by the symbol Dmel\Tpr2 (CG4599, FBgn0032586). It is a protein_coding_gene from Drosophila melanogaster. Its sequence location is 2L:16491542..16507352. It has the cytological map location 36A2. An electronic pipeline based on InterPro domains suggests that it has the molecular function</span>: heat shock protein binding. The b…	2	1	1	5primeCassette		510			altexon
FBgn0032600	CG17912	2L	16743404	This gene is referred to in FlyBase by the symbol Dmel\CG17912 (CG17912, FBgn0032600). It is a protein_coding_gene from Drosophila melanogaster. Its sequence location is 2L:16743404..16749609. It has the cytological map location 36A14. An electronic pipeline based on InterPro domains suggests that it has the molecular function</span>: DNA binding; zinc ion binding. The biological processes in whi…	2	1	1		3primeCassette		319		altexon
FBgn0032614	CG13284	2L	16848713	This gene is referred to in FlyBase by the symbol Dmel\CG13284 (CG13284, FBgn0032614). It is a protein_coding_gene from Drosophila melanogaster. Its sequence location is 2L:16843192..16848713. It has the cytological map location 36B2. Based on sequence similarity, it is predicted to have molecular function</span>: steroid dehydrogenase activity. There is experimental evidence that it is involved …	2	1	1	5primeCassette		114			altexon
FBgn0032629	beat-IIIc	2L	17260732	The gene beat-IIIc is referred to in FlyBase by the symbol Dmel\beat-IIIc (CG15138, FBgn0032629). It is a protein_coding_gene from Drosophila melanogaster. Its sequence location is 2L:17189810..17260732. It has the cytological map location 36C2-36C4. Its molecular function is unknown. The biological processes in which it is involved are not known. 11 alleles are reported. No phenotypic data is av…	2	1	1		1				altexon
FBgn0032633	CG6860	2L	17384147	This gene is referred to in FlyBase by the symbol Dmel\CG6860 (CG6860, FBgn0032633). It is a protein_coding_gene from Drosophila melanogaster. Its sequence location is 2L:17367509..17384147. It has the cytological map location 36C7. An electronic pipeline based on InterPro domains suggests that it has the molecular function</span>: protein binding. Based on sequence similarity, it is predicted to…	2	1	1					978
FBgn0032651	Oli	2L	17589407	The gene Olig family is referred to in FlyBase by the symbol Dmel\Oli (CG5545, FBgn0032651). It is a protein_coding_gene from Drosophila melanogaster. Its sequence location is 2L:17589407..17591267. It has the cytological map location 36D1. Based on sequence similarity, it is predicted to have molecular function</span>: transcription factor activity. Based on sequence similarity, it is predicted …	2	1	1	5primeCassette		76			altexon
FBgn0032656	CG5674	2L	17963338	This gene is referred to in FlyBase by the symbol Dmel\CG5674 (CG5674, FBgn0032656). It is a protein_coding_gene from Drosophila melanogaster. Its sequence location is 2L:17963338..17974870. It has the cytological map location 36E3. Its molecular function is unknown. The biological processes in which it is involved are not known. 3 alleles are reported. No phenotypic data is available. It has 3 a…	2	1	1						altexon
FBgn0032783	CG10237	2L	19441278	This gene is referred to in FlyBase by the symbol Dmel\CG10237 (CG10237, FBgn0032783). It is a protein_coding_gene from Drosophila melanogaster. Its sequence location is 2L:19435844..19441278. It has the cytological map location 37E1. Based on sequence similarity, it is predicted to have molecular function</span>: retinal binding; vitamin E binding. An electronic pipeline based on InterPro domain…	2	1	1	5primeCassette	2	120		78	altexon
FBgn0032785	CG10026	2L	19454256	This gene is referred to in FlyBase by the symbol Dmel\CG10026 (CG10026, FBgn0032785). It is a protein_coding_gene from Drosophila melanogaster. Its sequence location is 2L:19454256..19457726. It has the cytological map location 37E1. Based on sequence similarity, it is predicted to have molecular function</span>: retinal binding; vitamin E binding. An electronic pipeline based on InterPro domain…	2	1	1	5primeCassette		308			altexon
FBgn0032796	CG10188	2L	19508760	This gene is referred to in FlyBase by the symbol Dmel\CG10188 (CG10188, FBgn0032796). It is a protein_coding_gene from Drosophila melanogaster. Its sequence location is 2L:19502334..19508760. It has the cytological map location 37E4-37E5. Based on sequence similarity, it is predicted to have molecular function</span>: Rho guanyl-nucleotide exchange factor activity. An electronic pipeline based o…	2	1	1						altexon
FBgn0032797	CG10186	2L	19517201	This gene is referred to in FlyBase by the symbol Dmel\CG10186 (CG10186, FBgn0032797). It is a protein_coding_gene from Drosophila melanogaster. Its sequence location is 2L:19508953..19517201. It has the cytological map location 37E5. An electronic pipeline based on InterPro domains suggests that it has the molecular function</span>: peptidase inhibitor activity. The biological processes in which…	2	1	1	5primeCassette	3primeCassette	65	1778		altexon
FBgn0032838	CG13966	2L	20017282	This gene is referred to in FlyBase by the symbol Dmel\CG13966 (CG13966, FBgn0032838). It is a protein_coding_gene from Drosophila melanogaster. Its sequence location is 2L:19969484..20017282. It has the cytological map location 38A8-38B1. Its molecular function is unknown. The biological processes in which it is involved are not known. One allele is reported. No phenotypic data is available. It …	2	1	1	5primeCassette		463			altexon
FBgn0032850	Kua	2L	20097858	The gene Kua is referred to in FlyBase by the symbol Dmel\Kua (CG10723, FBgn0032850). It is a protein_coding_gene from Drosophila melanogaster. Its sequence location is 2L:20097858..20103375. It has the cytological map location 38C1. Its molecular function is unknown. The biological processes in which it is involved are not known. 2 alleles are reported. No phenotypic data is available. It has 2 …	2	1	1	5primeCassette		83			altexon
FBgn0032886	CG9328	2L	20797717	This gene is referred to in FlyBase by the symbol Dmel\CG9328 (CG9328, FBgn0032886). It is a protein_coding_gene from Drosophila melanogaster. Its sequence location is 2L:20797717..20814030. It has the cytological map location 38E10-38F1. Its molecular function is unknown. The biological processes in which it is involved are not known. 9 alleles are reported. No phenotypic data is available. It h…	2	1	1	5primeCassette		798			altexon
FBgn0032889	CG9331	2L	20824436	This gene is referred to in FlyBase by the symbol Dmel\CG9331 (CG9331, FBgn0032889). It is a protein_coding_gene from Drosophila melanogaster. Its sequence location is 2L:20824436..20827724. It has the cytological map location 38F1. An electronic pipeline based on InterPro domains suggests that it has the molecular function</span>: NAD or NADH binding; oxidoreductase activity, acting on the CH-OH…	2	1	1	5primeCassette		289			altexon
FBgn0032911	tadr	2L	21071009	The gene torn and diminished rhabdomeres is referred to in FlyBase by the symbol Dmel\tadr (CG9264, FBgn0032911). It is a protein_coding_gene from Drosophila melanogaster. Its sequence location is 2L:21071009..21081053. It has the cytological map location 39A1. An electronic pipeline based on InterPro domains suggests that it has the molecular function</span>: amino acid transmembrane transporter…	2	1	1	5primeCassette		308			altexon
[truncated: 866 more rows]
